# Supplementary material for: N⋯π and O⋯π interactions rather than “directed” hydrogen bonding in the crystal packing of ethyl (Z)-2-cyano-3-[(4-alkoxyphenyl)amino]prop-2-enoates
Source: Royal Society of Chemistry journal article supplement (doi:10.1039/c1ce05199g), 2011-01-01
Supplement: c1ce05199g.fcf [file c1ce05199g.fcf]

# 
# h,k,l, Fc-squared, Fo-squared, sigma(Fo-squared) and status flag 
# 
data_s409b 
_shelx_title ' THB-2 in P-1' 
_shelx_refln_list_code          4 
_shelx_F_calc_maximum      115.34 
_exptl_crystal_F_000       552.00 
_reflns_d_resolution_high  0.8107 
 
loop_ 
 _symmetry_equiv_pos_as_xyz 
 'x, y, z' 
 '-x, -y, -z' 
 
_cell_length_a     8.4186 
_cell_length_b    12.5730 
_cell_length_c    13.2177 
_cell_angle_alpha  79.947 
_cell_angle_beta   84.258 
_cell_angle_gamma  79.707 
 
_shelx_F_squared_multiplier     1.000 
 
loop_ 
 _refln_index_h 
 _refln_index_k 
 _refln_index_l 
 _refln_F_squared_calc 
 _refln_F_squared_meas 
 _refln_F_squared_sigma 
 _refln_observed_status 
   2   0   0      693.68      682.71      4.93 o 
   4   0   0      555.75      519.07      5.71 o 
   5   0   0      373.26      396.07      5.83 o 
   6   0   0        7.46        9.24      1.64 o 
   7   0   0       14.25       11.41      1.89 o 
   8   0   0        0.10        0.28      1.57 o 
   9   0   0        4.38        5.61      1.90 o 
  10   0   0       18.00       16.52      3.07 o 
 -10   1   0       18.26       16.56      3.36 o 
  -9   1   0        3.76        5.12      2.34 o 
  -8   1   0        3.34        3.58      1.74 o 
  -7   1   0        1.84        3.55      1.60 o 
  -6   1   0       25.45       24.19      2.09 o 
  -5   1   0      219.99      226.24      2.79 o 
  -4   1   0       72.21       72.69      1.54 o 
  -3   1   0       56.67       62.18      1.23 o 
  -2   1   0       36.52       32.17      0.93 o 
  -1   1   0     6240.91     6016.29     37.45 o 
   0   1   0        0.63       -0.36      0.24 o 
   1   1   0      646.01      659.58      4.40 o 
   2   1   0      161.61      157.27      1.60 o 
   4   1   0       23.08       17.65      1.27 o 
   5   1   0        0.01       -1.14      0.92 o 
   6   1   0       18.03       14.33      1.72 o 
   7   1   0        4.29        4.71      1.63 o 
   8   1   0        4.62        3.52      1.69 o 
   9   1   0        4.07        4.48      1.69 o 
  10   1   0        7.89       13.74      2.46 o 
  -9   2   0       15.01        9.66      2.86 o 
  -8   2   0       16.42       15.41      2.47 o 
  -7   2   0       10.94       11.79      1.88 o 
  -6   2   0       40.85       37.83      2.42 o 
  -5   2   0     1369.82     1421.89     10.36 o 
  -4   2   0       17.56       16.75      0.94 o 
  -2   2   0     1552.52     1560.06     13.19 o 
  -1   2   0    10039.08     9431.86     75.89 o 
   0   2   0    11199.85    10237.38     80.98 o 
   1   2   0       72.80       86.19      1.08 o 
   2   2   0      280.78      282.78      2.42 o 
   3   2   0       88.86       93.39      1.33 o 
   4   2   0        0.12       -0.10      0.67 o 
   5   2   0        3.84        3.65      1.07 o 
   6   2   0       33.48       37.04      2.26 o 
   7   2   0        2.33        2.82      1.54 o 
   8   2   0       10.82       13.54      1.99 o 
   9   2   0        0.02        0.81      1.57 o 
  10   2   0        4.16        4.67      2.00 o 
  -9   3   0        0.28        4.24      2.52 o 
  -8   3   0        1.83        1.07      2.08 o 
  -7   3   0        0.04       -2.44      1.89 o 
  -6   3   0       37.66       45.47      2.61 o 
  -5   3   0       86.66       85.45      2.12 o 
  -4   3   0      138.08      141.15      2.38 o 
  -3   3   0       12.64       14.12      1.01 o 
  -2   3   0      283.46      345.02      3.12 o 
  -1   3   0      230.79      229.55      2.10 o 
   0   3   0     3587.26     3645.47     19.59 o 
   1   3   0      541.90      597.64      4.10 o 
   3   3   0      148.67      158.91      3.30 o 
   4   3   0       20.03       15.91      0.83 o 
   5   3   0      162.06      162.49      2.07 o 
   6   3   0       16.43       15.57      1.73 o 
   7   3   0        8.26        8.31      1.72 o 
   8   3   0        0.30       -0.09      1.96 o 
   9   3   0        1.70        1.55      1.56 o 
  10   3   0        4.85        2.30      2.45 o 
  -9   4   0        0.30        5.30      2.74 o 
  -8   4   0        9.24       10.09      2.74 o 
  -7   4   0        0.01       -0.62      2.06 o 
  -6   4   0       16.47       15.87      1.91 o 
  -5   4   0       81.74       77.36      2.52 o 
  -4   4   0      104.89      106.46      2.36 o 
  -2   4   0        0.54       -0.58      0.79 o 
   0   4   0      385.03      383.69      3.23 o 
   1   4   0      241.24      270.99      2.58 o 
   2   4   0     1104.23     1108.89      7.22 o 
   3   4   0      133.05      146.14      2.24 o 
   4   4   0      202.84      208.57      2.60 o 
   5   4   0       50.69       58.82      1.83 o 
   6   4   0       45.28       43.81      2.78 o 
   7   4   0       16.91       17.97      1.94 o 
   8   4   0       13.47        9.59      1.91 o 
   9   4   0        2.96        5.26      2.46 o 
  10   4   0        1.01        1.85      2.03 o 
  -9   5   0        8.88        7.51      2.92 o 
  -8   5   0        6.56        8.36      2.98 o 
  -7   5   0        0.08        0.52      2.29 o 
  -6   5   0       16.26       14.98      2.66 o 
  -5   5   0      169.88      158.69      2.97 o 
  -4   5   0       54.94       55.13      1.80 o 
  -3   5   0        2.57        3.73      0.68 o 
  -2   5   0       42.22       42.92      1.95 o 
  -1   5   0        1.12        1.13      0.68 o 
   0   5   0        0.62        0.40      0.44 o 
   1   5   0        6.04        3.85      0.56 o 
   2   5   0     4201.00     4051.19     22.50 o 
   3   5   0       14.08       13.15      0.84 o 
   4   5   0        8.87       11.11      0.88 o 
   5   5   0       84.48       94.04      2.06 o 
   6   5   0        0.46        1.06      1.72 o 
   7   5   0      119.00      121.12      3.78 o 
   8   5   0        1.70        1.09      1.34 o 
   9   5   0        0.55        0.47      1.73 o 
  10   5   0        0.17       -1.41      2.68 o 
  -8   6   0        1.17       -0.61      2.42 o 
  -7   6   0        2.49        0.41      2.34 o 
  -6   6   0       48.72       46.33      6.03 o 
  -5   6   0       20.15       19.80      1.90 o 
  -4   6   0        5.27        3.02      1.30 o 
  -3   6   0      215.46      199.83      3.95 o 
  -2   6   0       72.43       78.11      2.51 o 
  -1   6   0        1.75       -0.17      0.80 o 
   0   6   0        0.26       -0.44      0.53 o 
   1   6   0      216.17      224.18      2.67 o 
   2   6   0        1.51        2.35      0.61 o 
   3   6   0      641.53      597.89      5.17 o 
   4   6   0       45.12       38.43      2.06 o 
   5   6   0        0.51       -0.11      0.76 o 
   6   6   0       20.22       20.56      1.88 o 
   7   6   0        0.49        1.07      1.38 o 
   8   6   0       26.59       28.06      2.46 o 
   9   6   0        0.01        1.55      1.79 o 
  10   6   0        0.20        3.63      3.30 o 
  -8   7   0        4.57        3.36      2.79 o 
  -7   7   0        6.37        7.36      2.70 o 
  -6   7   0        0.01       -3.16      2.11 o 
  -5   7   0        2.33       -1.06      1.80 o 
  -4   7   0        4.28        2.45      1.57 o 
  -3   7   0      826.03      835.07      8.94 o 
  -2   7   0      380.21      367.57      5.34 o 
  -1   7   0       65.65       74.55      2.47 o 
   0   7   0       28.94       27.11      1.30 o 
   1   7   0       76.32       82.91      2.10 o 
   2   7   0     3549.77     3590.52     22.75 o 
   3   7   0        0.01        0.09      0.70 o 
   4   7   0       42.57       35.17      1.47 o 
   5   7   0       22.07       18.51      1.22 o 
   6   7   0      156.55      161.37      3.50 o 
   7   7   0      110.84      110.49      3.59 o 
   8   7   0       10.67       12.00      1.96 o 
   9   7   0        5.89        3.94      3.76 o 
  -7   8   0        3.39        1.86      2.42 o 
  -6   8   0       10.89        7.07      2.74 o 
  -5   8   0       13.41       12.75      1.95 o 
  -4   8   0      938.56      921.16     10.28 o 
  -3   8   0       21.01       23.92      2.11 o 
  -2   8   0        8.07        4.85      1.37 o 
  -1   8   0       24.88       26.50      1.82 o 
   0   8   0       77.20       73.40      3.29 o 
   1   8   0     1117.88     1109.55     11.65 o 
   2   8   0       55.82       59.95      2.40 o 
   3   8   0       13.83        8.25      1.00 o 
   4   8   0        1.69        2.44      0.89 o 
   5   8   0       18.97       20.51      1.41 o 
   6   8   0       80.59       82.11      3.11 o 
   7   8   0       16.11       16.41      1.94 o 
   8   8   0        4.82        1.90      2.46 o 
   9   8   0        0.17        1.40      2.21 o 
  -7   9   0        4.08        7.60      4.02 o 
  -6   9   0        0.61       -1.42      2.24 o 
  -5   9   0        2.02        0.98      1.59 o 
  -4   9   0       28.13       30.04      2.52 o 
  -3   9   0      822.59      891.46     10.11 o 
  -2   9   0        0.10       -1.11      1.30 o 
  -1   9   0      131.86      122.92      3.45 o 
   0   9   0       20.47       16.00      1.65 o 
   1   9   0      313.69      331.54      4.16 o 
   2   9   0        2.06        0.96      0.88 o 
   3   9   0       25.42       20.91      1.40 o 
   4   9   0        0.19       -0.78      0.88 o 
   5   9   0        1.17       -1.28      0.85 o 
   6   9   0       15.32       17.30      2.57 o 
   7   9   0       28.46       27.29      5.57 o 
   8   9   0        0.23       -1.77      2.33 o 
   9   9   0        0.30        2.20      2.20 o 
  -6  10   0        4.06        9.68      3.01 o 
  -5  10   0        0.57        0.80      2.62 o 
  -4  10   0      172.08      196.10      7.39 o 
  -3  10   0      139.75      174.98      5.56 o 
  -1  10   0       11.81       12.98      1.78 o 
   0  10   0       57.28       60.21      4.57 o 
   1  10   0       13.46       11.92      1.53 o 
   2  10   0        2.57        3.33      0.99 o 
   3  10   0       40.18       41.45      1.97 o 
   4  10   0        0.15       -0.70      1.09 o 
   5  10   0        0.11       -0.78      1.53 o 
   6  10   0        0.02       -0.57      1.73 o 
   7  10   0        7.16        7.45      2.27 o 
   8  10   0        3.95        5.12      2.52 o 
  -5  11   0        2.83        1.29      1.74 o 
  -4  11   0        1.07        0.61      1.60 o 
  -3  11   0       32.78       20.97      2.28 o 
  -2  11   0       29.17       19.28      2.15 o 
  -1  11   0        0.00        1.42      1.29 o 
   0  11   0        8.94       11.70      3.92 o 
   1  11   0        1.45        2.35      1.18 o 
   2  11   0        8.39        9.38      1.44 o 
   3  11   0       47.61       39.26      2.15 o 
   4  11   0        0.25       -1.63      1.09 o 
   5  11   0        0.45        0.56      1.72 o 
   6  11   0        1.49        2.32      1.92 o 
   7  11   0        0.17       -1.38      2.01 o 
   8  11   0        0.01        0.01      2.24 o 
  -4  12   0        0.27        1.06      2.47 o 
  -3  12   0        5.71        2.47      3.39 o 
  -2  12   0       11.13       12.36      2.12 o 
  -1  12   0        3.48        1.94      1.44 o 
   0  12   0        0.14        2.35      1.72 o 
   1  12   0        1.08        0.55      1.63 o 
   2  12   0        5.48        3.31      1.77 o 
   3  12   0        1.28        4.97      1.77 o 
   4  12   0        2.71        0.50      1.33 o 
   5  12   0        6.20        2.55      1.78 o 
   6  12   0        4.33        4.03      2.14 o 
   7  12   0        3.93        6.03      2.57 o 
  -3  13   0        0.81        3.21      2.13 o 
  -2  13   0       43.91       51.54      3.28 o 
  -1  13   0        8.37        7.99      1.81 o 
   0  13   0       13.63       16.19      2.64 o 
   1  13   0        7.01       10.05      3.50 o 
   2  13   0       20.91       22.25      4.54 o 
   3  13   0        3.01        5.24      2.05 o 
   4  13   0       12.17       14.54      2.39 o 
   5  13   0        0.00        0.58      1.97 o 
   6  13   0        0.30       -0.77      2.10 o 
  -2  14   0        2.90        2.39      2.15 o 
  -1  14   0       48.86       57.15      7.06 o 
   0  14   0        0.19       -0.84      1.82 o 
   1  14   0        0.42        2.17      2.04 o 
   2  14   0        9.67        9.37      2.42 o 
   3  14   0        0.41        0.63      2.59 o 
   4  14   0       13.99       15.50      2.64 o 
   5  14   0        0.02        1.60      1.63 o 
   0  15   0        2.06        2.89      3.43 o 
   1  15   0        2.34        4.28      2.16 o 
   2  15   0        1.00       -3.01      2.66 o 
   3  15   0        3.43        4.82      2.79 o 
  -2 -15   1        0.14       -0.76      3.24 o 
  -1 -15   1       12.32       12.83      2.85 o 
  -5 -14   1       19.92       22.66      2.62 o 
  -4 -14   1        0.59        1.06      1.96 o 
  -3 -14   1        8.48       10.55      2.49 o 
  -2 -14   1       43.04       49.94      3.92 o 
  -1 -14   1        0.61        1.22      2.33 o 
   0 -14   1        5.46        5.13      2.18 o 
   1 -14   1        0.13       -0.08      2.00 o 
  -6 -13   1        5.56        9.71      5.77 o 
  -5 -13   1        0.07       -1.12      1.52 o 
  -4 -13   1        5.15        8.46      2.15 o 
  -3 -13   1        0.22        0.75      1.77 o 
  -2 -13   1       15.95       19.84      2.66 o 
  -1 -13   1       12.28       10.23      2.46 o 
   0 -13   1        1.06       -1.61      3.11 o 
   1 -13   1        0.03        0.67      1.88 o 
   2 -13   1        3.79        5.14      2.35 o 
   3 -13   1       12.89       19.61      2.48 o 
  -7 -12   1       33.02       38.96      9.46 o 
  -6 -12   1        0.16       -1.23      2.11 o 
  -5 -12   1        2.43        0.92      1.71 o 
  -4 -12   1        0.20       -1.83      1.22 o 
  -3 -12   1       15.56       16.99      2.39 o 
  -2 -12   1        5.30        5.37      1.94 o 
  -1 -12   1       18.85       14.50      3.89 o 
   0 -12   1        6.03       12.05      2.25 o 
   1 -12   1        8.78       11.04      1.78 o 
   2 -12   1        4.62       11.67      1.96 o 
   3 -12   1        1.42        1.68      1.74 o 
   4 -12   1       29.40       36.12      5.73 o 
  -8 -11   1       25.28       23.60      3.53 o 
  -7 -11   1       48.76       44.93      4.08 o 
  -6 -11   1        0.21       -1.17      1.99 o 
  -5 -11   1        2.61        1.56      1.95 o 
  -4 -11   1        1.14        0.22      1.25 o 
  -3 -11   1        5.06        3.67      1.24 o 
  -2 -11   1        0.28       -0.66      1.81 o 
  -1 -11   1        6.22        6.43      1.73 o 
   0 -11   1       45.18       50.07      5.26 o 
   1 -11   1        0.07        0.10      1.19 o 
   2 -11   1        0.94        1.40      1.38 o 
   3 -11   1       56.65       62.92      9.03 o 
   4 -11   1        0.38        1.17      1.60 o 
   5 -11   1        0.01        2.31      2.27 o 
  -8 -10   1        1.86       -2.93      1.96 o 
  -7 -10   1       12.63       13.98      2.73 o 
  -6 -10   1        1.92        3.02      2.59 o 
  -5 -10   1        0.61       -0.15      1.20 o 
  -4 -10   1        0.63       -0.94      1.20 o 
  -3 -10   1        0.00       -1.18      1.12 o 
  -2 -10   1        0.47       -0.72      1.87 o 
  -1 -10   1       14.93       22.99      1.56 o 
   0 -10   1        4.65        6.21      1.35 o 
   1 -10   1        4.16        2.85      1.56 o 
   2 -10   1        0.64        2.24      1.35 o 
   3 -10   1      105.95       89.73      6.95 o 
   4 -10   1       21.04       19.67      2.30 o 
   5 -10   1        1.34        2.18      1.96 o 
   6 -10   1        0.06        1.21      2.47 o 
  -9  -9   1        2.48        3.75      3.95 o 
  -8  -9   1       13.53       11.02      2.52 o 
  -7  -9   1       22.70       24.16      3.82 o 
  -6  -9   1        2.29        3.19      1.93 o 
  -5  -9   1        3.72        2.84      1.29 o 
  -4  -9   1       47.94       48.63      2.46 o 
  -3  -9   1       28.72       25.00      1.50 o 
  -2  -9   1      286.75      297.19      3.65 o 
  -1  -9   1        0.04       -0.78      0.85 o 
   0  -9   1        0.35        0.49      0.95 o 
   1  -9   1        3.53        4.39      1.40 o 
   2  -9   1      984.04      882.78     11.93 o 
   3  -9   1        2.31        1.88      1.37 o 
   4  -9   1      436.54      473.28      7.30 o 
   5  -9   1       92.76       91.72      6.30 o 
   6  -9   1        2.48        0.65      2.47 o 
   7  -9   1       32.00       41.30      4.31 o 
  -9  -8   1        2.94        4.16      2.34 o 
  -8  -8   1        3.84        2.27      2.53 o 
  -7  -8   1        3.40        2.79      1.86 o 
  -6  -8   1       83.88       72.51      3.98 o 
  -5  -8   1       41.13       42.72      1.94 o 
  -4  -8   1       54.85       61.31      2.04 o 
  -3  -8   1        7.70        7.10      0.96 o 
  -2  -8   1        0.41        1.03      0.76 o 
  -1  -8   1       20.74       26.66      1.96 o 
   0  -8   1       82.74       94.69      2.42 o 
   1  -8   1      190.90      178.65      3.76 o 
   2  -8   1        4.46        8.37      1.46 o 
   4  -8   1      131.34      139.58      4.09 o 
   5  -8   1       34.50       33.41      2.99 o 
   6  -8   1        1.38        0.17      2.34 o 
   7  -8   1        1.93       -0.42      2.52 o 
  -9  -7   1        4.09        2.27      2.24 o 
  -8  -7   1        7.32        4.01      2.14 o 
  -7  -7   1        3.69        4.68      1.56 o 
  -6  -7   1       16.10       19.26      3.04 o 
  -5  -7   1       37.51       40.76      2.21 o 
  -4  -7   1       50.98       58.17      1.91 o 
  -3  -7   1      508.65      534.83      5.04 o 
  -2  -7   1        4.46        5.44      0.81 o 
   0  -7   1      841.15      838.22      6.73 o 
   1  -7   1       65.18       76.13      1.98 o 
   2  -7   1       26.48       23.08      1.16 o 
   3  -7   1       21.37       18.82      2.38 o 
   4  -7   1     2136.23     2106.12     35.64 o 
   5  -7   1       57.24       53.59      4.26 o 
   6  -7   1      105.88      114.92      5.54 o 
   7  -7   1        4.61        5.93      2.74 o 
   8  -7   1        0.10       -1.46      4.54 o 
  -9  -6   1        0.31       -1.81      1.92 o 
  -8  -6   1        7.34        7.84      1.87 o 
  -7  -6   1        1.76        0.58      2.40 o 
  -6  -6   1      278.48      266.34      4.87 o 
  -5  -6   1      145.48      146.31      2.68 o 
  -4  -6   1       83.35       73.95      1.94 o 
  -2  -6   1       90.81       99.12      2.38 o 
  -1  -6   1      328.44      314.75      4.08 o 
   0  -6   1      905.22      866.55      6.58 o 
   1  -6   1        1.03        1.62      0.69 o 
   2  -6   1       53.72       59.51      1.52 o 
   3  -6   1      881.85      841.58      6.81 o 
   4  -6   1       27.14       28.53      2.03 o 
   5  -6   1        0.14       -1.91      1.27 o 
   6  -6   1        0.04       -1.00      3.37 o 
   7  -6   1        0.26       -3.79      2.53 o 
   8  -6   1        0.49        1.32      2.52 o 
 -10  -5   1       19.36       17.32      3.76 o 
  -9  -5   1        0.72       -0.24      3.66 o 
  -8  -5   1       23.38       26.59      2.51 o 
  -7  -5   1        0.51        1.19      1.34 o 
  -6  -5   1      125.41      128.75      3.59 o 
  -5  -5   1       78.32       76.68      2.00 o 
  -4  -5   1        2.96        7.08      1.72 o 
  -3  -5   1       40.33       48.68      1.61 o 
  -2  -5   1      186.37      167.99      2.24 o 
  -1  -5   1     1350.41     1340.58      8.65 o 
   0  -5   1       32.95       30.03      1.20 o 
   1  -5   1        1.05        0.90      0.80 o 
   2  -5   1        0.00        0.08      0.54 o 
   3  -5   1      252.03      237.13      3.05 o 
   4  -5   1      165.06      160.81      2.83 o 
   5  -5   1       13.20       12.17      1.28 o 
   6  -5   1      218.63      220.31      6.50 o 
   7  -5   1        3.85        3.76      2.47 o 
   8  -5   1        2.53       -0.79      3.43 o 
   9  -5   1        8.70        7.72      6.48 o 
 -10  -4   1       46.61       47.13      3.61 o 
  -9  -4   1       35.61       39.31      3.13 o 
  -8  -4   1        2.73        5.46      1.71 o 
  -7  -4   1        9.47        9.65      1.77 o 
  -6  -4   1       93.12       88.67      3.09 o 
  -4  -4   1       72.58       78.01      1.69 o 
  -3  -4   1       49.53       48.95      1.30 o 
  -2  -4   1      235.08      219.71      3.57 o 
  -1  -4   1     1713.77     1689.93     10.08 o 
   0  -4   1      506.08      529.27      4.14 o 
   1  -4   1        1.92        1.04      0.54 o 
   3  -4   1        3.56        5.96      0.75 o 
   4  -4   1       60.30       62.36      2.06 o 
   5  -4   1       38.11       32.76      1.60 o 
   6  -4   1       29.81       31.07      2.28 o 
   7  -4   1        7.31        4.70      4.47 o 
   8  -4   1       16.54       17.62      3.01 o 
   9  -4   1       10.57       18.36      3.17 o 
 -10  -3   1        3.18       -0.39      1.99 o 
  -9  -3   1       18.41       24.19      2.67 o 
  -8  -3   1        0.68       -0.26      2.57 o 
  -7  -3   1       23.32       25.20      2.24 o 
  -6  -3   1       52.90       37.78      2.02 o 
  -5  -3   1       13.47       15.82      1.29 o 
  -4  -3   1      109.94      104.18      1.77 o 
  -3  -3   1       60.21       60.64      1.23 o 
  -2  -3   1      958.40     1000.90      6.47 o 
  -1  -3   1      331.39      303.07      2.58 o 
   0  -3   1       48.49       47.84      1.34 o 
   1  -3   1     1312.12     1284.47     12.70 o 
   2  -3   1        5.62        7.57      0.69 o 
   3  -3   1        0.69        0.04      0.53 o 
   4  -3   1       30.44       36.93      1.41 o 
   5  -3   1      202.53      210.20      3.14 o 
   6  -3   1       11.14       12.41      1.80 o 
   7  -3   1       29.31       33.36      2.52 o 
   8  -3   1       12.81        7.80      2.52 o 
   9  -3   1        6.63        6.81      2.71 o 
 -10  -2   1        1.06        2.70      2.10 o 
  -9  -2   1        0.00       -0.92      1.75 o 
  -8  -2   1        9.53       10.12      2.39 o 
  -7  -2   1       26.06       26.13      2.17 o 
  -6  -2   1       22.30       22.85      1.94 o 
  -5  -2   1       26.59       23.53      0.95 o 
  -4  -2   1       25.89       22.36      0.94 o 
  -2  -2   1        4.33        3.70      0.47 o 
   0  -2   1      843.08      925.76      5.59 o 
   1  -2   1     1919.61     1995.64     11.26 o 
   2  -2   1      567.17      550.52      4.17 o 
   3  -2   1        0.02       -0.30      0.56 o 
   5  -2   1       20.94       16.57      1.85 o 
   6  -2   1      672.48      648.02      8.00 o 
   7  -2   1       13.19       13.69      1.96 o 
   8  -2   1        0.07       -0.85      1.54 o 
   9  -2   1        0.45       -2.49      2.11 o 
 -10  -1   1        0.01       -1.61      1.94 o 
  -9  -1   1        0.48       -0.56      1.74 o 
  -8  -1   1        0.30        0.22      1.48 o 
  -7  -1   1        3.74        4.23      1.40 o 
  -6  -1   1        0.26        0.15      1.26 o 
  -5  -1   1        9.08        7.12      1.25 o 
  -4  -1   1       25.05       26.08      0.97 o 
  -3  -1   1        2.57        3.41      0.80 o 
  -2  -1   1      952.33      971.06      6.02 o 
  -1  -1   1        9.60        7.51      0.44 o 
   1  -1   1     4798.98     4428.20     23.31 o 
   2  -1   1     6661.81     6336.31     33.31 o 
   3  -1   1     2337.88     2276.68     16.00 o 
   4  -1   1        7.92        9.00      0.70 o 
   5  -1   1      397.44      372.66      5.30 o 
   6  -1   1        2.03        2.34      1.40 o 
   7  -1   1        4.74        6.09      1.71 o 
   8  -1   1       11.54       15.74      3.04 o 
   9  -1   1        3.10        1.90      1.88 o 
  10  -1   1       11.46       10.56      3.18 o 
 -10   0   1        0.57       -0.17      2.03 o 
  -9   0   1        1.18        1.57      1.84 o 
  -8   0   1        4.49        3.73      1.73 o 
  -7   0   1       23.45       26.11      2.31 o 
  -6   0   1        0.43       -1.54      1.17 o 
  -5   0   1      124.60      128.00      2.17 o 
  -4   0   1       30.06       37.62      1.17 o 
  -3   0   1      643.32      686.78      5.55 o 
  -2   0   1      107.65       98.77      2.53 o 
  -1   0   1     6185.58     6062.78     38.32 o 
   0   0   1       22.52       20.25      1.58 o 
   1   0   1      426.72      476.39      3.10 o 
   2   0   1     2919.48     2914.22     18.30 o 
   3   0   1       56.63       53.60      0.96 o 
   4   0   1      425.26      438.47      5.72 o 
   5   0   1      135.10      145.58      7.16 o 
   6   0   1      684.50      693.04      8.16 o 
   7   0   1       16.43       18.83      2.14 o 
   8   0   1       23.23       19.20      2.29 o 
   9   0   1        0.75       -0.28      1.79 o 
  10   0   1       10.63       10.76      2.48 o 
 -10   1   1        0.21       -2.16      2.45 o 
  -9   1   1        0.76        2.02      1.85 o 
  -8   1   1        3.20        2.86      1.72 o 
  -7   1   1       34.87       37.71      2.54 o 
  -6   1   1        1.40        1.50      1.35 o 
  -5   1   1        8.46        8.74      0.89 o 
  -4   1   1      242.37      249.36      2.90 o 
  -3   1   1     1238.84     1207.35      8.86 o 
  -2   1   1      154.97      133.32      2.47 o 
   0   1   1     1571.63     1526.74     13.14 o 
   2   1   1       33.02       32.86      1.07 o 
   3   1   1       63.77       55.02      1.69 o 
   4   1   1       91.15       96.85      2.29 o 
   5   1   1      777.87      735.86      7.65 o 
   6   1   1       18.57       22.24      1.94 o 
   7   1   1        3.59        4.14      1.68 o 
   8   1   1        1.10       -0.57      1.47 o 
   9   1   1        4.79        2.99      1.87 o 
  10   1   1        3.50        0.12      2.66 o 
  -9   2   1      102.70      100.52      5.38 o 
  -8   2   1       26.02       27.51      2.56 o 
  -7   2   1        3.74        6.19      1.59 o 
  -6   2   1      188.76      182.82      3.61 o 
  -5   2   1       23.46       22.43      1.29 o 
  -4   2   1     2435.08     2585.39     15.61 o 
  -3   2   1      204.18      222.54      2.62 o 
  -2   2   1      318.63      338.47      2.96 o 
  -1   2   1        1.99        1.42      0.40 o 
   0   2   1     1311.65     1305.54      9.24 o 
   1   2   1       63.37       68.01      1.66 o 
   2   2   1       40.38       38.77      2.10 o 
   3   2   1     1925.23     1939.22     11.30 o 
   4   2   1      106.25       94.50      2.33 o 
   5   2   1      208.87      232.40      4.40 o 
   6   2   1        4.86        2.75      1.28 o 
   7   2   1       12.95       15.20      1.90 o 
   8   2   1        2.99        3.00      1.64 o 
   9   2   1        3.94        0.43      1.84 o 
  10   2   1        1.40       -0.83      2.24 o 
  -9   3   1        0.09        1.67      2.49 o 
  -8   3   1       58.30       56.62      4.25 o 
  -7   3   1       39.80       29.51      3.74 o 
  -6   3   1        5.37        3.64      1.77 o 
  -5   3   1        0.58       -0.26      0.69 o 
  -4   3   1        6.02        9.45      0.93 o 
  -3   3   1     1189.46     1153.64      7.90 o 
  -1   3   1     4495.72     4453.88     46.59 o 
   0   3   1     8667.65     8242.44     59.97 o 
   1   3   1     5321.73     5027.48     26.51 o 
   2   3   1       31.13       29.82      1.18 o 
   3   3   1        7.78        7.46      0.62 o 
   4   3   1       53.16       53.51      1.22 o 
   5   3   1        0.15        0.19      0.89 o 
   6   3   1        8.40        5.62      1.36 o 
   7   3   1        0.22        0.55      1.39 o 
   8   3   1        0.43        1.48      1.75 o 
   9   3   1        0.51        0.39      1.72 o 
  10   3   1        0.61       -2.83      1.89 o 
  -9   4   1       48.90       45.07      4.24 o 
  -8   4   1        2.20        1.44      2.21 o 
  -7   4   1        1.55        5.58      2.18 o 
  -6   4   1       13.63       17.12      1.90 o 
  -5   4   1       72.85       73.54      2.77 o 
  -4   4   1     2022.30     2044.39     13.22 o 
  -3   4   1        3.39        2.98      0.68 o 
  -2   4   1       90.91      109.74      2.60 o 
  -1   4   1       12.44       13.28      0.96 o 
   0   4   1      862.47      856.25      5.71 o 
   1   4   1     2474.23     2529.13     17.93 o 
   2   4   1       62.08       69.51      1.37 o 
   3   4   1      316.60      329.10      3.22 o 
   4   4   1       13.47       13.67      0.87 o 
   5   4   1        0.09        0.19      0.53 o 
   6   4   1       11.09       10.63      1.54 o 
   7   4   1        0.25        1.56      1.42 o 
   8   4   1        3.92        4.74      1.82 o 
   9   4   1        2.67        0.55      1.77 o 
  10   4   1        1.37        1.02      2.23 o 
  -9   5   1        6.55        8.75      2.84 o 
  -8   5   1        7.09        8.92      2.73 o 
  -7   5   1       13.26       10.50      2.58 o 
  -6   5   1       55.64       42.15      5.83 o 
  -5   5   1       38.84       43.00      2.26 o 
  -4   5   1      118.18      105.35      3.57 o 
  -3   5   1      597.00      580.48      5.00 o 
  -2   5   1        0.24        3.02      0.87 o 
  -1   5   1        5.01        4.08      2.15 o 
   0   5   1        9.15        9.79      0.63 o 
   1   5   1      613.44      606.88      4.71 o 
   2   5   1       27.90       30.35      1.17 o 
   3   5   1       92.61       92.71      1.80 o 
   4   5   1       91.44      101.51      1.97 o 
   5   5   1        6.89        6.81      0.83 o 
   6   5   1        3.67        2.89      1.27 o 
   7   5   1        5.79        4.70      1.50 o 
   8   5   1        3.90        5.81      1.69 o 
   9   5   1        4.41        0.57      1.73 o 
  10   5   1        0.63       -1.91      1.98 o 
  -8   6   1        0.67        0.28      2.43 o 
  -7   6   1       12.39       13.56      2.84 o 
  -6   6   1       19.75       13.29      2.79 o 
  -5   6   1        6.04        5.36      1.46 o 
  -4   6   1       70.12       70.25      2.72 o 
  -3   6   1       77.77       68.39      2.62 o 
  -2   6   1        6.27        8.19      1.13 o 
  -1   6   1       47.08       46.38      2.36 o 
   0   6   1       93.22      104.94      1.74 o 
   1   6   1      112.57      108.87      1.94 o 
   2   6   1      163.68      142.93      2.26 o 
   3   6   1      526.85      532.22      4.79 o 
   4   6   1       49.24       63.98      1.76 o 
   5   6   1        9.74        9.86      1.00 o 
   6   6   1        4.13        3.19      1.24 o 
   7   6   1       15.09       15.97      1.90 o 
   8   6   1       24.92       26.04      3.36 o 
   9   6   1        0.06       -2.16      2.28 o 
  10   6   1        2.21        2.48      2.01 o 
  -8   7   1        3.23        6.08      2.74 o 
  -7   7   1       15.85       19.71      3.25 o 
  -6   7   1        1.31       -2.08      1.97 o 
  -5   7   1        3.06        0.18      1.30 o 
  -4   7   1      483.62      449.28      6.55 o 
  -3   7   1        2.79        3.67      1.42 o 
  -2   7   1      357.81      334.73      5.60 o 
  -1   7   1       23.40       21.91      2.01 o 
   0   7   1        8.81       10.92      0.86 o 
   1   7   1       46.18       49.75      1.54 o 
   2   7   1       42.97       52.15      2.13 o 
   3   7   1       89.21       90.79      2.19 o 
   4   7   1       26.83       25.43      1.80 o 
   5   7   1        3.55        2.27      0.90 o 
   6   7   1        0.30        0.71      1.26 o 
   7   7   1       15.46       13.35      1.87 o 
   8   7   1       40.28       35.56      2.67 o 
   9   7   1        0.06       -1.01      2.14 o 
  -7   8   1        0.41       -0.44      2.85 o 
  -6   8   1        0.92        1.20      2.29 o 
  -5   8   1        0.59       -1.79      1.30 o 
  -4   8   1        3.48        2.58      1.58 o 
  -3   8   1        3.92        4.71      1.58 o 
  -2   8   1      141.18      137.40      3.64 o 
  -1   8   1      590.91      604.73      7.55 o 
   0   8   1       50.37       56.50      1.75 o 
   1   8   1        0.45        1.22      1.59 o 
   2   8   1      451.15      432.82      5.56 o 
   3   8   1       46.50       46.06      1.85 o 
   4   8   1       36.75       35.15      1.70 o 
   5   8   1       21.39       27.06      2.13 o 
   6   8   1        0.36       -1.79      1.67 o 
   7   8   1       28.43       26.05      2.29 o 
   8   8   1       22.70       18.89      1.98 o 
   9   8   1        0.54        0.66      1.86 o 
  -7   9   1       14.27       23.17      3.62 o 
  -6   9   1        0.03        1.43      2.47 o 
  -5   9   1        3.22        1.59      1.58 o 
  -4   9   1      151.03      158.01      4.34 o 
  -3   9   1       42.11       47.00      3.50 o 
  -2   9   1     1744.04     1743.76     15.26 o 
  -1   9   1       13.80       10.76      1.57 o 
   0   9   1       27.96       22.73      1.78 o 
   1   9   1       10.69       11.03      1.09 o 
   2   9   1      196.93      197.27      3.24 o 
   3   9   1        0.30        0.91      0.90 o 
   4   9   1        0.10       -0.40      0.85 o 
   5   9   1       74.55       71.27      2.15 o 
   6   9   1        8.00       10.50      1.46 o 
   7   9   1        2.29        4.92      1.40 o 
   8   9   1        5.47        1.49      1.97 o 
   9   9   1        1.26        3.46      2.15 o 
  -6  10   1        2.62        3.45      2.52 o 
  -5  10   1        0.00       -3.47      2.53 o 
  -4  10   1        0.92        0.47      1.51 o 
  -3  10   1       42.99       48.71      3.54 o 
  -2  10   1       83.48       85.54      3.62 o 
   0  10   1        3.35        0.99      1.21 o 
   1  10   1      127.18      113.00      3.27 o 
   2  10   1       39.67       39.34      2.15 o 
   3  10   1       31.11       35.64      2.00 o 
   4  10   1        0.84       -0.23      0.93 o 
   5  10   1        2.64        1.47      0.97 o 
   6  10   1        9.87        7.65      2.15 o 
   7  10   1        6.06        4.80      2.11 o 
   8  10   1       12.68       12.90      2.61 o 
  -5  11   1       61.82       74.09      3.93 o 
  -4  11   1        0.42       -1.65      1.34 o 
  -3  11   1      169.42      165.61      7.12 o 
  -2  11   1      415.02      462.15      7.38 o 
  -1  11   1        4.83        1.60      1.42 o 
   0  11   1      633.70      589.54     13.88 o 
   1  11   1        7.47        7.76      1.46 o 
   2  11   1        0.08        0.66      1.08 o 
   3  11   1        4.34        4.58      1.08 o 
   4  11   1       56.39       60.61      2.85 o 
   5  11   1        1.07        2.01      1.27 o 
   6  11   1        7.98        8.79      4.15 o 
   7  11   1        3.32        2.50      2.15 o 
   8  11   1        1.37        2.20      2.11 o 
  -5  12   1        1.17        1.23      1.82 o 
  -4  12   1        0.18       -0.17      1.99 o 
  -3  12   1        0.53        1.17      1.51 o 
  -2  12   1        0.69        2.26      1.57 o 
  -1  12   1       66.33       51.05      3.01 o 
   0  12   1        9.60       14.33      1.85 o 
   1  12   1        1.01        0.91      1.23 o 
   2  12   1        9.69        7.11      1.48 o 
   3  12   1        2.14        2.26      1.68 o 
   4  12   1        0.16       -0.36      1.18 o 
   5  12   1        0.00       -0.82      1.55 o 
   6  12   1        0.79       -0.37      3.50 o 
   7  12   1        0.88       -1.58      1.97 o 
  -3  13   1        0.04        1.15      1.96 o 
  -2  13   1        0.12       -0.74      2.04 o 
  -1  13   1       61.92       63.16      3.26 o 
   0  13   1        0.34        3.16      1.50 o 
   1  13   1        1.03        3.01      1.41 o 
   2  13   1        8.13        8.35      2.08 o 
   3  13   1        4.18        2.82      1.77 o 
   4  13   1        2.08        0.06      1.62 o 
   5  13   1        2.72        2.53      2.21 o 
   6  13   1        0.69       -1.53      1.99 o 
  -2  14   1       26.01       32.47      3.43 o 
  -1  14   1        1.18        3.45      1.65 o 
   1  14   1        1.46        2.41      2.53 o 
   2  14   1        1.37       -0.81      1.75 o 
   3  14   1        1.27       -1.00      2.20 o 
   4  14   1        2.65        1.02      1.92 o 
   5  14   1        1.54        0.07      2.85 o 
   0  15   1        7.71        9.90      2.92 o 
   1  15   1        0.01       -1.41      2.06 o 
   2  15   1        0.73       -2.73      1.82 o 
   3  15   1        1.61        1.70      2.18 o 
   4  15   1        7.26        2.54      2.13 o 
  -4 -14   2        1.01        2.58      2.53 o 
  -3 -14   2        0.67       -1.93      2.85 o 
  -2 -14   2        7.24        8.32      2.28 o 
  -1 -14   2        0.01       -2.26      1.51 o 
   0 -14   2        0.04        0.67      1.94 o 
   1 -14   2       29.79       36.10      3.72 o 
  -6 -13   2        9.11        8.00      2.98 o 
  -4 -13   2        5.87        7.46      2.18 o 
  -3 -13   2        0.68        1.01      1.77 o 
  -2 -13   2       14.91       13.41      2.46 o 
  -1 -13   2        9.93       11.58      2.39 o 
   0 -13   2        0.05       -0.08      1.73 o 
   1 -13   2        0.78       -1.88      1.81 o 
   2 -13   2        1.07        1.41      2.06 o 
   3 -13   2        1.52        8.29      2.49 o 
  -7 -12   2       64.11       57.29      4.72 o 
  -6 -12   2      126.74      131.21     10.43 o 
  -5 -12   2        0.02       -1.13      1.44 o 
  -4 -12   2        1.01        0.27      1.41 o 
  -3 -12   2        0.02       -1.35      1.58 o 
  -2 -12   2       33.56       24.51      2.71 o 
  -1 -12   2        2.60       -0.21      3.11 o 
   0 -12   2       22.39       25.20      2.86 o 
   1 -12   2        0.05       -1.49      1.65 o 
   2 -12   2        0.28       -0.33      1.73 o 
   3 -12   2       85.71      114.03      8.21 o 
   4 -12   2        0.81       -1.07      1.61 o 
  -7 -11   2        0.56        3.17      2.43 o 
  -6 -11   2       52.25       50.83      4.26 o 
  -5 -11   2       16.28       13.77      2.04 o 
  -4 -11   2        2.05        1.55      1.37 o 
  -3 -11   2        1.09        0.18      1.14 o 
  -2 -11   2       31.05       30.25      2.80 o 
  -1 -11   2        0.73        2.30      1.58 o 
   0 -11   2       38.55       34.64      2.99 o 
   1 -11   2       11.41       12.46      1.72 o 
   3 -11   2        0.02       -0.92      1.71 o 
   4 -11   2       45.08       55.21      3.35 o 
   5 -11   2        0.17        1.26      1.70 o 
  -8 -10   2        0.13        2.44      2.40 o 
  -7 -10   2      117.92      113.33      5.26 o 
  -6 -10   2       16.74       19.32      3.50 o 
  -5 -10   2       13.20       10.19      1.75 o 
  -4 -10   2       23.81       23.39      2.09 o 
  -3 -10   2       16.53       14.28      1.75 o 
  -2 -10   2       20.80       17.91      1.87 o 
  -1 -10   2        5.18        7.89      1.58 o 
   0 -10   2        8.36        9.94      2.19 o 
   1 -10   2        3.56        3.58      1.76 o 
   2 -10   2        2.10        3.83      1.40 o 
   3 -10   2        2.37       -1.37      2.74 o 
   4 -10   2       22.35       21.56      2.80 o 
   5 -10   2        0.21       -2.24      1.49 o 
   6 -10   2        1.38        0.51      6.09 o 
  -8  -9   2        6.26        5.95      2.36 o 
  -7  -9   2       58.85       62.01      4.86 o 
  -6  -9   2        2.43        3.95      2.85 o 
  -5  -9   2        1.66        1.73      1.36 o 
  -4  -9   2        0.74       -1.11      1.17 o 
  -3  -9   2        4.85        3.51      1.62 o 
  -2  -9   2        3.20        3.19      1.42 o 
  -1  -9   2      158.76      152.37      3.78 o 
   0  -9   2        5.48        8.27      1.22 o 
   1  -9   2       16.17       15.39      1.64 o 
   2  -9   2       10.57       11.40      1.62 o 
   3  -9   2        9.61        9.89      1.62 o 
   4  -9   2       40.65       29.30      2.38 o 
   5  -9   2       11.25        6.68      2.06 o 
   6  -9   2        0.00       -2.87      2.66 o 
   7  -9   2        5.72        7.26      2.93 o 
  -9  -8   2        0.04        2.06      2.34 o 
  -8  -8   2        0.19       -2.75      1.83 o 
  -7  -8   2        1.82        4.22      1.99 o 
  -6  -8   2        9.89        8.70      2.18 o 
  -5  -8   2       95.99       97.68      4.29 o 
  -4  -8   2        0.00        0.39      1.22 o 
  -3  -8   2        6.96        6.02      1.30 o 
  -2  -8   2        0.81        0.12      0.88 o 
  -1  -8   2      193.72      205.67      3.22 o 
   0  -8   2       31.97       29.89      1.61 o 
   1  -8   2        2.67        3.84      1.01 o 
   2  -8   2       46.31       49.34      2.48 o 
   3  -8   2       40.47       30.90      2.70 o 
   4  -8   2        1.82        3.39      1.61 o 
   5  -8   2      178.56      216.44      5.10 o 
   6  -8   2      103.61      121.06     12.64 o 
   7  -8   2        3.57        4.09      2.84 o 
  -9  -7   2        6.25        4.45      2.45 o 
  -8  -7   2        6.05        6.36      2.34 o 
  -7  -7   2        0.28        2.11      1.84 o 
  -6  -7   2       10.72        6.32      3.37 o 
  -5  -7   2       79.54       78.71      2.54 o 
  -4  -7   2       37.28       37.39      1.89 o 
  -3  -7   2        0.20        0.74      0.67 o 
  -2  -7   2        7.62        3.91      0.74 o 
  -1  -7   2       40.09       48.86      1.69 o 
   0  -7   2       10.03        9.76      1.01 o 
   1  -7   2      284.92      328.20      3.96 o 
   2  -7   2        8.65        6.49      1.12 o 
   3  -7   2      200.33      178.87      4.01 o 
   4  -7   2        0.00       -1.17      1.33 o 
   5  -7   2      367.68      422.30      6.60 o 
   6  -7   2       52.94       62.27      4.70 o 
   7  -7   2        0.03        0.80      4.21 o 
   8  -7   2        0.53       -3.70      3.89 o 
  -9  -6   2       26.60       26.50      5.31 o 
  -8  -6   2        0.42        1.08      2.33 o 
  -7  -6   2        0.64        3.24      2.01 o 
  -6  -6   2       33.93       39.28      2.36 o 
  -5  -6   2       80.99       78.85      2.86 o 
  -4  -6   2      219.94      217.37      3.07 o 
  -3  -6   2      206.14      236.14      2.95 o 
  -2  -6   2       42.47       45.82      2.04 o 
   0  -6   2       45.23       40.72      1.86 o 
   1  -6   2     1931.18     2013.73     12.93 o 
   2  -6   2       95.43       83.22      1.99 o 
   3  -6   2       12.93        7.50      1.25 o 
   4  -6   2       43.89       44.97      3.48 o 
   5  -6   2       31.03       33.73      2.39 o 
   6  -6   2      363.41      370.72      8.78 o 
   7  -6   2        2.52        2.51      2.61 o 
   8  -6   2        1.54        0.08      2.51 o 
  -9  -5   2      116.31      122.32      5.81 o 
  -8  -5   2        5.06        7.88      1.81 o 
  -7  -5   2       41.90       49.73      2.74 o 
  -6  -5   2       27.93       30.92      2.17 o 
  -5  -5   2      662.83      662.10      5.96 o 
  -4  -5   2      738.37      720.77      5.96 o 
  -3  -5   2       90.87       80.03      1.67 o 
  -2  -5   2      369.64      301.43      3.03 o 
  -1  -5   2        0.02        1.84      0.55 o 
   0  -5   2     7999.27     7879.98     42.21 o 
   1  -5   2      124.30      124.38      2.18 o 
   2  -5   2       34.30       33.00      1.59 o 
   3  -5   2       44.72       52.01      1.72 o 
   4  -5   2      105.13      106.06      2.48 o 
   5  -5   2      584.42      585.97      6.00 o 
   6  -5   2        0.31       -1.23      2.10 o 
   7  -5   2        0.44       -2.33      2.08 o 
   8  -5   2        0.38       -2.70      2.43 o 
   9  -5   2        2.47        1.76      2.79 o 
 -10  -4   2       88.15       98.86      5.46 o 
  -9  -4   2       12.83        9.69      2.91 o 
  -8  -4   2        2.53        2.11      2.27 o 
  -7  -4   2        0.01       -1.66      1.31 o 
  -6  -4   2      264.02      278.92      5.04 o 
  -5  -4   2        7.94        9.68      1.04 o 
  -4  -4   2      133.47      139.15      2.31 o 
  -3  -4   2        1.33        2.69      0.57 o 
  -2  -4   2      170.67      187.57      2.16 o 
  -1  -4   2     2899.51     2804.42     15.91 o 
   1  -4   2      259.45      257.75      2.90 o 
   2  -4   2        3.63        6.09      0.72 o 
   3  -4   2        0.00        0.97      0.67 o 
   4  -4   2       19.06       14.50      1.16 o 
   5  -4   2      253.89      237.67      3.56 o 
   6  -4   2       17.83       22.51      2.13 o 
   7  -4   2        0.39       -2.57      2.66 o 
   8  -4   2        5.88        6.36      2.73 o 
   9  -4   2        0.79       -3.41      2.27 o 
 -10  -3   2       24.32       27.36      3.07 o 
  -9  -3   2       88.40      101.33      5.74 o 
  -8  -3   2        0.32       -1.11      1.79 o 
  -7  -3   2       12.07       12.04      1.82 o 
  -6  -3   2        9.83       13.33      1.76 o 
  -5  -3   2      760.77      809.06      7.37 o 
  -4  -3   2       20.87       20.67      1.09 o 
  -3  -3   2      649.26      664.27      5.09 o 
  -2  -3   2       11.16       17.27      1.19 o 
   0  -3   2     9216.97     9057.25     47.49 o 
   1  -3   2       58.82       68.67      1.50 o 
   2  -3   2        0.54       -0.74      0.49 o 
   3  -3   2       17.18       20.81      1.07 o 
   4  -3   2       15.56       17.12      1.28 o 
   5  -3   2       22.97       21.66      1.30 o 
   6  -3   2        4.48        4.43      1.57 o 
   7  -3   2       45.17       47.12      2.86 o 
   8  -3   2        5.66        6.70      2.65 o 
   9  -3   2        0.31       -0.11      2.55 o 
 -10  -2   2       13.46       10.45      2.56 o 
  -9  -2   2        4.71        4.92      2.60 o 
  -8  -2   2        6.31        5.32      1.77 o 
  -7  -2   2        0.15       -0.76      2.57 o 
  -6  -2   2       38.20       43.19      2.44 o 
  -5  -2   2       28.14       37.99      1.41 o 
  -4  -2   2      430.55      412.10      3.92 o 
  -3  -2   2       38.09       36.68      1.22 o 
  -2  -2   2     1127.69     1176.79      7.36 o 
  -1  -2   2     1053.78     1042.45     10.04 o 
   0  -2   2     1020.94      954.96      5.95 o 
   1  -2   2      268.26      293.31      2.72 o 
   2  -2   2        0.09       -0.03      0.48 o 
   3  -2   2        0.00        0.25      0.73 o 
   4  -2   2       44.96       49.49      1.98 o 
   5  -2   2       19.61       20.36      1.21 o 
   6  -2   2       22.93       25.85      2.09 o 
   7  -2   2       21.00       19.11      2.25 o 
   8  -2   2       13.41       13.40      2.18 o 
   9  -2   2        0.79        0.13      1.82 o 
 -10  -1   2        4.29        6.36      2.31 o 
  -9  -1   2        2.55        1.43      1.98 o 
  -8  -1   2       34.27       40.65      3.40 o 
  -7  -1   2        6.98        9.48      1.81 o 
  -6  -1   2        0.02       -1.32      1.20 o 
  -5  -1   2      187.07      164.02      3.18 o 
  -4  -1   2       62.09       60.64      1.55 o 
  -3  -1   2      849.51      858.94      6.05 o 
  -2  -1   2        3.51        5.06      0.60 o 
  -1  -1   2       46.21       54.78      1.03 o 
   1  -1   2     1367.74     1479.35      8.62 o 
   2  -1   2     1944.08     1967.59     11.43 o 
   3  -1   2      500.52      455.63      3.84 o 
   5  -1   2       47.74       37.59      2.73 o 
   6  -1   2       40.24       33.76      2.28 o 
   7  -1   2       25.13       29.82      2.39 o 
   8  -1   2        4.45        2.07      1.64 o 
   9  -1   2        1.83        1.62      1.81 o 
  10  -1   2        0.83        2.92      2.13 o 
 -10   0   2        2.23        0.58      1.96 o 
  -9   0   2       30.07       31.63      3.42 o 
  -8   0   2        2.54        1.29      1.73 o 
  -7   0   2        0.14        2.08      1.55 o 
  -6   0   2       47.84       36.77      2.34 o 
  -5   0   2        0.17       -0.85      0.66 o 
  -4   0   2        5.97        6.56      0.74 o 
  -3   0   2       10.79       11.55      0.76 o 
  -2   0   2       84.60      104.31      1.58 o 
  -1   0   2        2.09        0.34      0.47 o 
   1   0   2       64.31       50.18      0.95 o 
   2   0   2     8406.51     8018.83     41.89 o 
   3   0   2     1730.27     1592.38      9.66 o 
   4   0   2      257.05      229.05      2.39 o 
   5   0   2      136.78      150.96      3.39 o 
   6   0   2       12.33       11.40      1.64 o 
   7   0   2      258.64      277.58      5.43 o 
   8   0   2       20.50       22.16      2.38 o 
   9   0   2        3.33        1.98      2.48 o 
  10   0   2        2.67        0.62      2.09 o 
  -9   1   2        1.07       -2.39      1.60 o 
  -8   1   2       22.00       23.31      2.45 o 
  -7   1   2        2.29       -1.36      1.36 o 
  -6   1   2       17.71       19.38      1.93 o 
  -5   1   2       15.44       16.04      1.12 o 
  -4   1   2      267.73      289.65      3.35 o 
  -3   1   2        0.05        0.20      0.46 o 
  -1   1   2     1153.53     1070.69      8.10 o 
   0   1   2        4.28        4.05      0.34 o 
   2   1   2     1399.60     1389.13      8.64 o 
   3   1   2     2518.66     2497.46     14.20 o 
   4   1   2        0.00        0.19      1.08 o 
   5   1   2       19.66       23.21      2.17 o 
   6   1   2        7.69        9.98      1.60 o 
   7   1   2       38.94       38.32      3.49 o 
   8   1   2       14.62       13.52      3.03 o 
   9   1   2        0.16       -2.71      1.86 o 
  10   1   2        0.44       -1.61      1.88 o 
  -9   2   2        8.32        4.92      3.43 o 
  -8   2   2       63.59       64.77      4.18 o 
  -7   2   2        5.15        3.56      1.97 o 
  -6   2   2        1.26        2.83      1.96 o 
  -5   2   2      181.08      162.49      2.80 o 
  -4   2   2        1.20        0.48      0.68 o 
  -3   2   2     1384.98     1427.83      9.32 o 
  -2   2   2      848.10      846.15     10.66 o 
   0   2   2      574.65      582.78      3.95 o 
   1   2   2      162.85      158.72      1.62 o 
   3   2   2        0.02        0.66      0.44 o 
   4   2   2       57.94       67.34      2.06 o 
   5   2   2       34.18       36.00      1.92 o 
   6   2   2      103.32      100.99      3.14 o 
   7   2   2       98.49       96.14      3.51 o 
   8   2   2        1.92        2.72      1.56 o 
   9   2   2        0.35       -0.92      1.77 o 
  10   2   2        0.00       -2.62      1.75 o 
  -9   3   2        4.10       -1.28      2.21 o 
  -8   3   2      114.73      112.56      5.31 o 
  -7   3   2       17.67       18.31      2.08 o 
  -6   3   2        3.28        0.91      1.39 o 
  -5   3   2        5.26        4.89      0.98 o 
  -4   3   2       29.65       31.42      1.43 o 
  -3   3   2      340.05      373.81      4.21 o 
  -2   3   2       84.70       89.21      1.42 o 
  -1   3   2      194.18      211.42      3.20 o 
   0   3   2       47.19       52.43      1.30 o 
   1   3   2     5577.05     5707.18     32.10 o 
   2   3   2      466.36      436.59      3.52 o 
   3   3   2     1010.62     1051.64      7.02 o 
   4   3   2       52.86       56.32      1.39 o 
   5   3   2        0.33       -0.19      0.91 o 
   6   3   2       17.62       19.26      1.79 o 
   7   3   2        6.29        4.17      1.49 o 
   8   3   2        1.37        0.56      1.50 o 
   9   3   2        0.62       -1.63      3.26 o 
  10   3   2        0.88        0.61      2.97 o 
  -9   4   2        7.67        7.02      2.61 o 
  -8   4   2        2.60        1.04      3.37 o 
  -7   4   2       74.38       72.71      7.00 o 
  -6   4   2       52.20       56.17      3.89 o 
  -5   4   2       25.23       26.23      1.54 o 
  -4   4   2       13.22       13.42      1.15 o 
  -3   4   2     2895.43     3007.53     23.01 o 
  -2   4   2       37.79       39.53      1.22 o 
   0   4   2     1145.92     1176.63      7.47 o 
   1   4   2     8524.65     8111.72     42.95 o 
   2   4   2     4863.95     4718.61     25.52 o 
   3   4   2      100.54      106.65      1.77 o 
   4   4   2       62.10       61.22      1.57 o 
   5   4   2       45.50       51.49      1.94 o 
   6   4   2       11.72       10.71      1.51 o 
   7   4   2        2.83        1.44      1.32 o 
   8   4   2        9.41       13.37      1.97 o 
   9   4   2        0.09       -2.04      2.51 o 
  10   4   2        0.97       -0.21      2.00 o 
  -8   5   2        3.58        3.91      2.43 o 
  -7   5   2        4.61        8.68      2.47 o 
  -6   5   2        2.50        2.73      2.19 o 
  -5   5   2       23.60       25.74      2.55 o 
  -4   5   2      208.60      226.43      3.46 o 
  -3   5   2      229.87      218.15      3.74 o 
  -2   5   2       90.33      107.69      2.62 o 
  -1   5   2       60.61       64.60      1.94 o 
   0   5   2      174.67      201.77      3.98 o 
   1   5   2       59.14       65.00      1.44 o 
   2   5   2      476.43      502.66      4.28 o 
   3   5   2       82.79       93.69      3.42 o 
   4   5   2       53.45       52.84      1.54 o 
   5   5   2       40.90       35.61      1.48 o 
   6   5   2        2.00        1.17      1.19 o 
   7   5   2       10.77       10.19      2.52 o 
   8   5   2        2.78       -0.25      1.48 o 
   9   5   2        0.00       -0.35      1.69 o 
  10   5   2        0.13       -3.07      2.05 o 
  -8   6   2        9.39       16.40      3.07 o 
  -7   6   2        0.78        2.98      2.38 o 
  -6   6   2       52.62       47.64      3.80 o 
  -5   6   2       10.93       11.97      1.68 o 
  -4   6   2        1.32        0.71      1.19 o 
  -3   6   2      180.41      172.78      3.68 o 
  -2   6   2       68.76       66.11      2.32 o 
   0   6   2       25.83       24.74      1.02 o 
   1   6   2       23.69       20.41      1.16 o 
   2   6   2      257.20      253.46      3.85 o 
   3   6   2       87.40      104.00      2.24 o 
   4   6   2      342.86      332.10      5.18 o 
   5   6   2        1.61        3.01      0.84 o 
   6   6   2       22.49       21.17      1.87 o 
   7   6   2       16.84       19.29      1.99 o 
   8   6   2        7.91        4.47      1.64 o 
   9   6   2        5.02        2.14      1.71 o 
  10   6   2        2.83        2.07      2.63 o 
  -8   7   2        5.22        5.58      2.69 o 
  -7   7   2       48.08       39.62      3.94 o 
  -6   7   2        3.29        0.26      2.98 o 
  -5   7   2        0.94        1.72      1.33 o 
  -4   7   2        8.93        4.47      1.55 o 
  -3   7   2      204.22      178.84      4.00 o 
  -2   7   2       56.89       54.93      2.43 o 
  -1   7   2        0.48       -1.08      0.82 o 
   0   7   2       59.01       59.07      2.18 o 
   1   7   2        1.14        1.06      0.67 o 
   2   7   2       27.50       26.08      1.26 o 
   3   7   2       15.03       16.25      1.12 o 
   4   7   2      733.29      685.86      6.14 o 
   5   7   2        7.98        7.43      1.02 o 
   6   7   2        3.21        3.71      1.39 o 
   7   7   2        4.84        5.07      1.51 o 
   8   7   2        0.14        3.21      1.59 o 
   9   7   2       15.58       12.77      2.21 o 
  -7   8   2        7.89       11.85      2.98 o 
  -6   8   2       14.68       12.17      2.79 o 
  -5   8   2        0.50       -1.91      1.28 o 
  -4   8   2       76.37       66.64      3.45 o 
  -3   8   2       59.18       54.32      3.70 o 
  -2   8   2        6.18        1.48      1.32 o 
  -1   8   2       28.58       23.26      1.75 o 
   0   8   2      104.17       92.08      1.98 o 
   1   8   2        0.02        0.79      0.95 o 
   2   8   2        3.37        1.61      0.78 o 
   3   8   2      124.11      120.96      2.56 o 
   4   8   2       28.25       25.80      1.47 o 
   5   8   2       84.27       83.31      2.36 o 
   6   8   2        3.78        3.02      1.30 o 
   7   8   2        0.54        0.97      1.32 o 
   8   8   2        2.52        4.69      1.73 o 
   9   8   2        0.01       -0.43      1.90 o 
  -7   9   2       24.25       20.85      6.87 o 
  -6   9   2        1.29        0.17      2.24 o 
  -5   9   2        4.28        2.10      1.75 o 
  -4   9   2        0.66       -1.39      1.86 o 
  -3   9   2        2.32        2.72      1.63 o 
  -2   9   2       23.04       21.16      2.04 o 
  -1   9   2      484.89      502.47      8.71 o 
   0   9   2      339.72      335.60      5.21 o 
   1   9   2       10.53       11.82      1.14 o 
   2   9   2        5.38        4.65      0.97 o 
   3   9   2       24.97       22.91      1.90 o 
   4   9   2      790.75      819.70      7.45 o 
   5   9   2        0.72        0.36      0.92 o 
   6   9   2        3.44        2.61      1.40 o 
   7   9   2        2.46        3.13      1.52 o 
   8   9   2       26.45       27.61      2.69 o 
   9   9   2       14.01        9.18      3.95 o 
  -6  10   2       16.63       20.48      3.48 o 
  -5  10   2        0.97        0.99      1.57 o 
  -4  10   2       17.36       20.05      2.28 o 
  -3  10   2       24.37       29.67      2.48 o 
  -2  10   2     1036.63     1029.75     11.12 o 
   0  10   2       16.99       18.13      2.17 o 
   1  10   2       18.90       13.72      1.64 o 
   2  10   2       52.63       56.06      2.39 o 
   3  10   2      282.54      281.90      3.45 o 
   4  10   2       26.88       33.58      1.85 o 
   5  10   2        3.06        0.77      1.08 o 
   6  10   2        0.00       -1.20      1.24 o 
   7  10   2        0.64       -0.92      1.37 o 
   8  10   2       16.37       12.92      2.25 o 
  -5  11   2        0.62       -0.98      3.07 o 
  -4  11   2        1.71        1.29      1.55 o 
  -3  11   2        5.15        3.07      1.64 o 
  -2  11   2        1.79        3.13      1.59 o 
  -1  11   2      812.51      901.87     10.39 o 
   0  11   2        0.00       -1.37      1.30 o 
   1  11   2       46.30       44.83      2.51 o 
   2  11   2       15.72       20.28      1.82 o 
   3  11   2      124.35      130.12      3.78 o 
   4  11   2        1.56        2.15      1.02 o 
   5  11   2        6.89        6.75      1.23 o 
   6  11   2        1.60        1.20      1.42 o 
   7  11   2        1.25        3.32      2.10 o 
   8  11   2        3.52        5.00      4.60 o 
  -5  12   2        3.29        4.74      2.79 o 
  -4  12   2       13.54       17.54      2.39 o 
  -3  12   2        0.08        1.67      1.64 o 
  -2  12   2      161.66      178.79      5.21 o 
  -1  12   2       32.92       46.44      2.88 o 
   0  12   2        8.02        6.08      2.42 o 
   1  12   2        3.30        5.27      1.51 o 
   2  12   2       34.38       34.24      2.26 o 
   3  12   2        8.42        6.92      1.48 o 
   4  12   2        0.19        0.08      0.96 o 
   5  12   2        4.63        5.26      1.52 o 
   6  12   2        0.00       -0.55      3.24 o 
   7  12   2        0.26       -0.35      1.96 o 
  -4  13   2       28.09       31.43      2.95 o 
  -3  13   2        0.25       -0.85      1.59 o 
  -2  13   2        4.07        3.79      1.67 o 
  -1  13   2       22.56       19.34      3.55 o 
   0  13   2        7.42        4.78      1.73 o 
   1  13   2        2.35        0.57      1.29 o 
   2  13   2        2.63        7.03      1.61 o 
   3  13   2        0.98       -2.18      1.45 o 
   4  13   2        4.57        3.82      2.07 o 
   5  13   2        8.86        6.58      1.69 o 
   6  13   2        0.00        1.90      3.82 o 
   7  13   2        0.04       -0.54      2.08 o 
  -2  14   2        0.05       -0.68      1.61 o 
  -1  14   2       13.43       14.98      4.59 o 
   0  14   2        4.06        3.32      1.62 o 
   1  14   2        0.24       -1.63      1.73 o 
   2  14   2        0.06       -0.09      1.86 o 
   3  14   2        0.17       -3.01      2.01 o 
   4  14   2        1.84        0.22      1.89 o 
   5  14   2        0.06       -1.03      2.20 o 
   6  14   2        0.08       -2.98      2.85 o 
   0  15   2       25.06       33.22      4.67 o 
   1  15   2       14.37       13.65      2.73 o 
   2  15   2        3.18        6.86      2.46 o 
   3  15   2        1.30        0.72      1.96 o 
   4  15   2        4.50        4.28      2.30 o 
  -4 -14   3        0.39        1.61      1.99 o 
  -3 -14   3       11.13        7.01      2.25 o 
  -2 -14   3        1.11        2.18      3.76 o 
  -1 -14   3        2.70        0.27      3.89 o 
   0 -14   3       51.72       46.05      4.03 o 
   1 -14   3        0.21        2.36      2.10 o 
  -5 -13   3       18.14       15.31      2.42 o 
  -4 -13   3        3.77        5.60      4.28 o 
  -3 -13   3        1.83        1.24      1.92 o 
  -2 -13   3        0.31        0.50      1.81 o 
  -1 -13   3        7.19        6.05      2.06 o 
   0 -13   3        0.10       -0.83      1.67 o 
   1 -13   3       23.96       18.88      4.47 o 
   2 -13   3        0.16       -0.27      2.07 o 
   3 -13   3        1.22        1.12      2.23 o 
  -6 -12   3        4.61        4.70      6.48 o 
  -5 -12   3      103.87      116.61      5.78 o 
  -4 -12   3        4.85        0.40      2.54 o 
  -3 -12   3       95.55       98.28      4.54 o 
  -2 -12   3        2.69        0.41      2.01 o 
  -1 -12   3       47.23       43.73      3.45 o 
   0 -12   3       86.18       85.21      4.48 o 
   1 -12   3        2.33        1.74      1.81 o 
   2 -12   3        4.39        6.62      2.28 o 
   3 -12   3        2.67       -1.30      1.71 o 
  -7 -11   3        1.82       -0.71      6.16 o 
  -6 -11   3      180.26      179.14      6.64 o 
  -5 -11   3       13.37       16.57      2.96 o 
  -4 -11   3       11.77        7.88      1.79 o 
  -3 -11   3        0.85       -2.02      1.37 o 
  -2 -11   3       24.12       28.41      2.36 o 
  -1 -11   3        0.54       -0.15      1.58 o 
   0 -11   3       29.21       23.29      2.64 o 
   1 -11   3       42.00       37.02      3.56 o 
   2 -11   3        0.02        1.89      1.71 o 
   3 -11   3        0.84        4.94      2.20 o 
   4 -11   3        0.67        2.25      1.70 o 
   5 -11   3       17.84       25.01      2.71 o 
  -8 -10   3       21.53       22.40      7.45 o 
  -7 -10   3       10.23       11.20      2.80 o 
  -6 -10   3       68.84       63.00      6.16 o 
  -5 -10   3      155.92      152.66      4.27 o 
  -4 -10   3       13.71       16.63      4.05 o 
  -3 -10   3        0.53       -0.68      1.21 o 
  -2 -10   3        0.10        0.08      1.26 o 
  -1 -10   3       62.39       54.14      3.93 o 
   0 -10   3        2.16        0.45      1.49 o 
   1 -10   3       74.08       65.19      3.54 o 
   2 -10   3       15.39       11.91      2.36 o 
   3 -10   3       15.88       18.45      2.18 o 
   5 -10   3        0.15        0.59      1.82 o 
   6 -10   3       15.12       20.85     11.41 o 
  -8  -9   3        0.01        0.95      2.37 o 
  -7  -9   3        9.65        6.25      4.41 o 
  -6  -9   3      107.20      107.61      4.85 o 
  -5  -9   3      227.40      234.09      5.11 o 
  -4  -9   3       14.90       13.05      1.76 o 
  -3  -9   3        0.05       -0.93      1.22 o 
  -2  -9   3        0.48        0.00      1.25 o 
  -1  -9   3        2.83        3.84      1.40 o 
   0  -9   3        6.72        9.14      1.27 o 
   1  -9   3        2.20        2.90      1.27 o 
   2  -9   3       62.60       66.14      2.99 o 
   3  -9   3        2.89        3.13      1.44 o 
   4  -9   3        0.37        1.10      1.33 o 
   5  -9   3       23.69       28.41      2.48 o 
   6  -9   3        0.00       -3.90      3.05 o 
  -9  -8   3        0.13       -2.56      2.27 o 
  -8  -8   3        2.49       -0.55      1.99 o 
  -7  -8   3       14.57       18.16      4.34 o 
  -6  -8   3        0.00        1.21      1.88 o 
  -5  -8   3       19.44       22.25      1.95 o 
  -4  -8   3        1.24        1.23      2.06 o 
  -3  -8   3        0.74        0.38      1.18 o 
  -2  -8   3        0.41       -0.25      1.11 o 
  -1  -8   3        2.15        2.12      0.84 o 
   0  -8   3        1.64        3.45      1.01 o 
   2  -8   3        0.08        2.80      1.27 o 
   3  -8   3        6.48        7.55      1.99 o 
   4  -8   3        3.70        2.81      1.43 o 
   5  -8   3       73.75       63.03      7.07 o 
   6  -8   3       35.22       40.71      4.13 o 
   7  -8   3        3.71        2.40      2.84 o 
  -9  -7   3        0.08        0.95      2.39 o 
  -8  -7   3        1.66        1.27      2.27 o 
  -7  -7   3       11.80       12.62      3.11 o 
  -6  -7   3       34.02       35.46      3.19 o 
  -5  -7   3       45.47       42.24      2.32 o 
  -4  -7   3        0.04        0.14      1.49 o 
  -3  -7   3        7.29        7.01      1.27 o 
  -2  -7   3      105.50       96.08      1.97 o 
  -1  -7   3       95.80       72.82      1.76 o 
   0  -7   3      738.92      788.23      6.76 o 
   1  -7   3       12.94       12.08      1.19 o 
   2  -7   3        3.37        3.11      1.02 o 
   3  -7   3        1.19        2.04      1.27 o 
   4  -7   3      719.43      657.73      8.24 o 
   5  -7   3        0.87       -0.54      1.98 o 
   6  -7   3      214.31      250.44      7.63 o 
   7  -7   3       21.38       17.74      3.43 o 
   8  -7   3        1.59        3.06      2.97 o 
  -9  -6   3       12.39       13.75      3.11 o 
  -8  -6   3       13.41       12.38      2.64 o 
  -7  -6   3        1.99        2.07      1.96 o 
  -6  -6   3       30.97       28.68      2.86 o 
  -5  -6   3       14.82       12.46      1.45 o 
  -4  -6   3      426.57      413.00      4.35 o 
  -3  -6   3       82.72       81.17      1.72 o 
  -2  -6   3      153.91      171.42      2.29 o 
  -1  -6   3        6.11        5.71      0.68 o 
   1  -6   3        0.01        2.25      0.79 o 
   2  -6   3       80.11       94.03      2.36 o 
   3  -6   3      164.44      157.58      2.98 o 
   4  -6   3       38.11       37.36      1.84 o 
   6  -6   3       69.02       68.28      4.58 o 
   7  -6   3       12.74       11.15      3.02 o 
   8  -6   3        0.88       -1.17      2.66 o 
  -9  -5   3        4.91        2.73      2.40 o 
  -8  -5   3        0.06       -1.19      1.90 o 
  -7  -5   3       12.72       16.68      2.65 o 
  -6  -5   3       21.86       23.43      2.04 o 
  -5  -5   3        0.71       -0.36      1.08 o 
  -4  -5   3       40.37       39.23      1.65 o 
  -3  -5   3      154.85      144.92      2.17 o 
  -2  -5   3       73.71       83.97      2.59 o 
  -1  -5   3     2235.06     2545.17     15.09 o 
   0  -5   3       32.32       31.30      1.37 o 
   2  -5   3     1381.48     1345.99      9.53 o 
   3  -5   3       72.82       74.92      2.09 o 
   4  -5   3       29.22       25.58      1.51 o 
   5  -5   3       11.61       13.48      1.38 o 
   6  -5   3     1279.26     1367.95     18.40 o 
   7  -5   3       34.77       42.40      6.16 o 
   8  -5   3       37.88       39.61      4.20 o 
  -9  -4   3       52.10       44.02      9.07 o 
  -8  -4   3       15.58       14.91      2.16 o 
  -7  -4   3        4.38        5.31      1.61 o 
  -6  -4   3       10.69       10.96      1.64 o 
  -5  -4   3       54.00       55.45      2.36 o 
  -4  -4   3     1823.13     1860.67     12.07 o 
  -3  -4   3      470.22      447.13      4.05 o 
  -2  -4   3      844.60      867.09      9.45 o 
  -1  -4   3        0.00        2.59      0.81 o 
   1  -4   3      480.27      495.78      4.51 o 
   2  -4   3      520.63      510.67      4.77 o 
   3  -4   3        0.87       -0.56      0.68 o 
   4  -4   3       27.58       30.99      2.04 o 
   5  -4   3      508.99      524.34      5.61 o 
   6  -4   3        2.97        2.46      1.92 o 
   7  -4   3        7.84        5.95      3.30 o 
   8  -4   3        0.33        2.14      2.61 o 
   9  -4   3        3.07        0.75      2.98 o 
  -9  -3   3       81.55       92.96      4.37 o 
  -8  -3   3       97.99      111.31      8.58 o 
  -7  -3   3        2.05       -0.15      2.01 o 
  -6  -3   3       60.56       65.50      3.11 o 
  -5  -3   3        1.06        0.75      0.81 o 
  -4  -3   3      244.04      256.55      3.21 o 
  -3  -3   3      234.44      224.20      2.72 o 
   0  -3   3      238.29      231.05      2.24 o 
   1  -3   3     3259.51     3340.43     18.93 o 
   2  -3   3        8.39        9.45      0.87 o 
   3  -3   3        0.02       -0.92      0.61 o 
   4  -3   3        0.22        0.66      0.73 o 
   5  -3   3      317.88      299.40      3.93 o 
   6  -3   3       46.14       45.16      2.67 o 
   7  -3   3       14.46       11.64      1.96 o 
   8  -3   3       47.45       49.33      8.68 o 
   9  -3   3        2.17        0.95      2.49 o 
  -9  -2   3       47.61       50.47      3.46 o 
  -8  -2   3      179.03      170.32      7.08 o 
  -7  -2   3      139.32      148.50      4.28 o 
  -6  -2   3        0.04       -0.19      1.57 o 
  -5  -2   3      198.67      210.80      3.57 o 
  -4  -2   3      243.19      242.62      3.06 o 
  -3  -2   3        0.01        0.93      0.57 o 
  -2  -2   3      467.79      473.14      4.28 o 
  -1  -2   3      170.08      193.88      4.92 o 
   1  -2   3     1276.35     1269.92      8.07 o 
   2  -2   3      221.20      224.56      2.65 o 
   3  -2   3       74.59       69.95      1.65 o 
   4  -2   3        0.24       -0.04      0.59 o 
   5  -2   3       59.10       55.29      1.79 o 
   6  -2   3       62.16       59.61      2.85 o 
   7  -2   3        6.46        4.89      1.71 o 
   8  -2   3        7.23        3.54      1.77 o 
   9  -2   3        2.30        2.56      1.94 o 
  -9  -1   3      383.06      404.83      7.62 o 
  -8  -1   3        8.82       15.94      2.57 o 
  -7  -1   3       94.84      107.73      3.68 o 
  -6  -1   3        2.29        1.27      1.42 o 
  -5  -1   3       57.31       63.61      1.97 o 
  -4  -1   3      326.69      272.44      3.25 o 
  -3  -1   3        0.36        0.66      0.57 o 
  -2  -1   3      586.14      633.09      5.78 o 
  -1  -1   3      314.36      298.28      2.57 o 
   0  -1   3     1965.10     2023.29     11.50 o 
   1  -1   3     1511.05     1507.38      9.07 o 
   2  -1   3       21.85       27.02      1.05 o 
   3  -1   3      647.69      662.90      5.21 o 
   4  -1   3       18.61       17.01      1.00 o 
   5  -1   3        0.16        1.40      0.65 o 
   6  -1   3       38.18       41.45      3.11 o 
   7  -1   3       14.92       18.02      2.06 o 
   8  -1   3        1.49        2.53      2.49 o 
   9  -1   3        5.20        2.00      1.91 o 
  -9   0   3       64.08       76.25      4.12 o 
  -8   0   3        0.08        1.30      1.72 o 
  -7   0   3        0.79        2.67      1.64 o 
  -6   0   3       31.77       36.44      2.35 o 
  -5   0   3       79.90       70.33      2.19 o 
  -4   0   3       85.46       86.24      1.94 o 
  -3   0   3       46.68       41.80      1.58 o 
  -2   0   3       11.16       10.23      0.74 o 
   2   0   3      630.12      634.30      4.64 o 
   3   0   3       85.08      101.52      1.72 o 
   4   0   3        0.88        0.17      0.56 o 
   5   0   3       17.40       15.93      0.98 o 
   6   0   3       38.65       46.66      2.47 o 
   7   0   3        0.95        1.61      1.51 o 
   8   0   3      123.13      122.45      5.37 o 
   9   0   3        1.47        0.46      1.88 o 
  10   0   3        0.22       -0.96      1.93 o 
  -9   1   3        7.63        3.25      1.89 o 
  -8   1   3        1.16        4.01      1.83 o 
  -7   1   3        1.89       -0.92      1.68 o 
  -6   1   3        0.68       -1.07      1.33 o 
  -4   1   3        6.98        4.17      0.79 o 
  -3   1   3       23.48       24.52      1.15 o 
  -2   1   3       94.25       81.66      1.85 o 
  -1   1   3        6.23        5.84      0.58 o 
   0   1   3     1358.18     1442.19      9.63 o 
   1   1   3        1.62        1.18      0.38 o 
   2   1   3        4.12        4.27      0.95 o 
   3   1   3      546.21      517.77      4.17 o 
   4   1   3     1147.62     1084.61      7.45 o 
   5   1   3      305.03      312.51      7.97 o 
   6   1   3        7.57        8.48      1.44 o 
   7   1   3       63.43       57.03      2.97 o 
   8   1   3        0.06       -0.57      1.48 o 
   9   1   3        0.81       -2.32      1.70 o 
  10   1   3        4.30        3.89      3.36 o 
  -9   2   3       18.74       12.80      2.89 o 
  -8   2   3        7.41        7.49      2.04 o 
  -7   2   3        6.60        4.52      1.59 o 
  -6   2   3       22.97       20.95      2.04 o 
  -5   2   3       64.50       71.71      2.51 o 
  -4   2   3        0.03        1.27      0.71 o 
  -3   2   3      427.38      456.97      4.33 o 
  -2   2   3        0.73        0.20      0.65 o 
  -1   2   3      485.71      533.27      4.14 o 
   1   2   3     6727.58     6650.21     34.93 o 
   2   2   3      164.99      178.75      2.08 o 
   3   2   3      246.06      289.28      2.89 o 
   4   2   3     1014.29      984.74      7.61 o 
   5   2   3       69.38       59.17      3.84 o 
   6   2   3       93.84       99.44      3.53 o 
   7   2   3       35.11       33.64      2.47 o 
   8   2   3      124.65      127.81      4.13 o 
   9   2   3        4.75        3.21      1.82 o 
  10   2   3        0.88       -2.69      1.79 o 
  -9   3   3        0.00       -0.12      2.33 o 
  -8   3   3        2.09        0.21      2.19 o 
  -7   3   3       24.10       24.05      2.29 o 
  -6   3   3        0.00       -1.51      1.28 o 
  -5   3   3      145.91      154.78      2.98 o 
  -4   3   3        7.89        6.72      0.95 o 
  -3   3   3        0.00       -0.60      0.61 o 
  -2   3   3      727.45      758.96      5.81 o 
  -1   3   3      428.87      420.76      3.69 o 
   0   3   3        8.10        3.86      0.84 o 
   1   3   3      807.08      799.26      5.38 o 
   2   3   3     2418.40     2367.63     13.58 o 
   3   3   3      132.94      151.73      2.31 o 
   4   3   3        0.00        0.29      0.99 o 
   5   3   3        8.76        8.91      0.82 o 
   6   3   3       43.80       49.14      2.54 o 
   7   3   3      149.83      135.11      3.86 o 
   8   3   3        3.60        3.59      1.61 o 
   9   3   3        0.93       -2.39      1.59 o 
  10   3   3        0.00        0.81      1.90 o 
  -9   4   3        0.37       -1.50      2.92 o 
  -8   4   3        9.65       10.31      2.75 o 
  -7   4   3      280.08      263.87      7.71 o 
  -6   4   3       16.36       13.79      2.52 o 
  -5   4   3        5.39        7.58      1.25 o 
  -4   4   3      604.39      603.46      5.76 o 
  -3   4   3        7.59        9.22      0.95 o 
  -2   4   3     3774.67     4034.43     22.84 o 
  -1   4   3        0.73        0.88      0.58 o 
   0   4   3      139.67      148.31      1.99 o 
   1   4   3       17.45       20.77      0.79 o 
   2   4   3      144.49      144.87      2.26 o 
   3   4   3       78.00       76.00      1.63 o 
   4   4   3        6.65        9.38      0.90 o 
   5   4   3      388.04      386.26      4.01 o 
   6   4   3       38.79       29.23      2.01 o 
   7   4   3       38.42       39.97      2.49 o 
   8   4   3        0.02       -0.19      1.47 o 
   9   4   3        1.86        1.64      1.71 o 
  10   4   3        0.78        0.12      1.89 o 
  -8   5   3        9.71        1.77      2.38 o 
  -7   5   3        0.04        5.57      2.47 o 
  -6   5   3      164.14      145.66      5.45 o 
  -5   5   3      175.40      159.20      3.83 o 
  -4   5   3        4.02        3.84      1.00 o 
  -3   5   3       24.61       29.55      1.41 o 
  -2   5   3        0.20        0.67      0.69 o 
  -1   5   3     1078.11     1050.87      9.05 o 
   0   5   3       18.20       20.22      0.94 o 
   1   5   3      939.15      917.49      6.51 o 
   2   5   3     2113.38     2109.93     12.74 o 
   3   5   3     1002.73      952.93      6.94 o 
   4   5   3       15.04        9.90      1.23 o 
   5   5   3        2.46        2.50      0.80 o 
   6   5   3        3.80        1.20      1.23 o 
   7   5   3        0.98        0.41      1.25 o 
   8   5   3        4.74        3.12      1.54 o 
   9   5   3        1.31       -2.05      1.54 o 
  10   5   3        0.33       -1.48      3.26 o 
  -8   6   3        1.01        1.07      2.34 o 
  -7   6   3      121.46       91.95      8.04 o 
  -6   6   3        2.92        0.83      2.10 o 
  -5   6   3        6.57        5.41      1.47 o 
  -4   6   3       70.47       76.32      3.18 o 
  -3   6   3      166.06      174.40      5.18 o 
  -2   6   3     1983.59     1983.62     15.25 o 
  -1   6   3       72.41       71.31      2.24 o 
   0   6   3      185.68      228.87      2.81 o 
   1   6   3       13.63       14.48      0.90 o 
   2   6   3      109.32       89.64      1.83 o 
   3   6   3      744.14      752.40      6.09 o 
   4   6   3        0.43       -0.04      0.74 o 
   5   6   3       72.67       66.13      1.98 o 
   6   6   3        3.93        5.64      1.97 o 
   7   6   3        0.36       -1.04      1.23 o 
   8   6   3        2.29        1.80      1.48 o 
   9   6   3        0.22        0.48      1.79 o 
  10   6   3        0.32       -2.73      1.98 o 
  -8   7   3       13.43        7.72      2.88 o 
  -7   7   3        3.57        3.54      2.79 o 
  -6   7   3       16.09       21.40      3.11 o 
  -5   7   3        9.02       11.85      1.76 o 
  -4   7   3      118.85      114.07      3.63 o 
  -3   7   3        0.53        0.96      1.25 o 
  -2   7   3      140.02      135.37      4.38 o 
  -1   7   3      353.25      347.91      4.93 o 
   0   7   3       36.47       39.26      1.38 o 
   1   7   3       17.93       14.76      1.02 o 
   2   7   3       20.19       24.04      1.11 o 
   3   7   3       30.80       26.01      1.33 o 
   4   7   3       11.60       15.34      1.21 o 
   5   7   3       51.61       51.04      1.88 o 
   6   7   3        5.43        1.74      1.39 o 
   7   7   3        0.09        0.30      1.30 o 
   8   7   3        0.27        0.67      1.47 o 
   9   7   3        1.92        3.83      1.88 o 
  -7   8   3       32.60       45.49      7.19 o 
  -6   8   3        5.13        5.68      2.52 o 
  -5   8   3        2.51        5.35      1.56 o 
  -4   8   3        1.72        3.39      1.50 o 
  -3   8   3        0.49       -1.63      1.29 o 
  -2   8   3      100.11       96.07      3.24 o 
  -1   8   3       71.31       70.85      2.73 o 
   0   8   3        2.04        3.69      0.79 o 
   1   8   3       65.13       62.31      1.96 o 
   2   8   3       46.13       43.50      1.68 o 
   3   8   3       30.50       30.58      1.96 o 
   4   8   3       33.42       31.86      1.65 o 
   5   8   3       41.29       44.32      2.30 o 
   6   8   3       13.75       18.80      1.90 o 
   7   8   3        4.38        3.51      1.46 o 
   8   8   3        0.08       -0.68      2.80 o 
   9   8   3        4.87        4.70      1.99 o 
  -7   9   3        0.04        2.16      3.05 o 
  -6   9   3       13.67       11.95      2.79 o 
  -5   9   3        7.84        6.98      1.73 o 
  -4   9   3        0.03       -2.00      1.33 o 
  -3   9   3        0.80       -1.70      1.44 o 
  -2   9   3      404.31      366.58      5.99 o 
  -1   9   3        0.27       -0.06      1.24 o 
   0   9   3      284.57      278.04      6.09 o 
   1   9   3        0.29        0.27      0.84 o 
   2   9   3        6.83        6.55      1.21 o 
   3   9   3       28.58       32.23      1.66 o 
   4   9   3       15.22       17.45      1.42 o 
   5   9   3        1.55        3.54      1.04 o 
   6   9   3        4.90        3.39      1.43 o 
   7   9   3        0.32       -0.26      1.35 o 
   8   9   3        0.01       -1.69      1.52 o 
   9   9   3        1.73        1.95      1.96 o 
  -6  10   3        8.31        7.84      2.84 o 
  -5  10   3        0.84        0.79      1.53 o 
  -4  10   3        5.40        2.81      1.61 o 
  -3  10   3        0.05       -0.93      1.41 o 
  -1  10   3        6.99        6.02      2.06 o 
   0  10   3      167.22      170.70      4.15 o 
   1  10   3      169.97      197.30      4.17 o 
   2  10   3       32.45       40.06      1.87 o 
   3  10   3        0.10        0.25      0.96 o 
   4  10   3       58.19       56.69      2.28 o 
   5  10   3        4.27        3.33      1.09 o 
   6  10   3        2.72        4.26      1.56 o 
   7  10   3       10.05        5.31      1.71 o 
   8  10   3        1.33        3.14      1.76 o 
   9  10   3        4.42        2.89      2.46 o 
  -5  11   3       12.95       22.98      2.61 o 
  -4  11   3        0.47       -0.18      2.22 o 
  -3  11   3        6.53        4.72      1.77 o 
  -2  11   3      109.11      118.30      5.75 o 
  -1  11   3       17.71       19.90      2.15 o 
   0  11   3      740.30      786.28      9.34 o 
   1  11   3        2.13        0.14      1.22 o 
   2  11   3       35.34       29.48      2.09 o 
   3  11   3        0.44        0.93      1.02 o 
   4  11   3       34.19       34.03      1.93 o 
   5  11   3        0.70       -0.06      1.06 o 
   6  11   3        0.63        0.61      1.69 o 
   7  11   3        9.31        8.79      1.86 o 
   8  11   3        0.48       -0.62      3.43 o 
  -4  12   3        2.28        0.43      1.63 o 
  -3  12   3        1.19        0.18      1.53 o 
  -2  12   3        0.97       -0.78      1.43 o 
  -1  12   3       20.47       26.17      2.40 o 
   0  12   3       16.34       21.50      2.29 o 
   2  12   3        6.74        9.84      1.58 o 
   3  12   3       47.85       39.45      2.45 o 
   4  12   3       10.79       12.67      1.44 o 
   5  12   3       13.42       15.66      1.90 o 
   6  12   3        0.57        0.01      1.50 o 
   7  12   3        0.35       -0.34      1.64 o 
  -3  13   3       51.39       67.01      4.70 o 
  -2  13   3        0.18        0.66      1.62 o 
  -1  13   3      134.01      152.80      4.65 o 
   0  13   3      180.54      191.65      6.82 o 
   1  13   3        3.91        0.64      1.46 o 
   2  13   3      202.64      189.14      4.64 o 
   3  13   3        5.43        4.17      1.51 o 
   4  13   3        0.18       -1.26      1.29 o 
   5  13   3        3.74        3.73      1.61 o 
   6  13   3        8.03       10.87      2.51 o 
   7  13   3        0.20        2.02      2.08 o 
  -2  14   3        0.04       -1.07      1.54 o 
  -1  14   3        5.31        5.98      1.95 o 
   0  14   3        2.36        3.26      1.65 o 
   1  14   3       15.59        9.67      1.85 o 
   2  14   3        9.01       10.60      1.81 o 
   3  14   3        0.29        5.05      2.05 o 
   4  14   3        3.73        1.09      2.72 o 
   5  14   3        0.03        0.34      1.80 o 
   6  14   3        0.66       -3.24      2.85 o 
   0  15   3        2.45        2.21      1.78 o 
   1  15   3       30.37       27.38      5.77 o 
   2  15   3        0.01       -0.91      1.78 o 
   3  15   3        0.63        1.23      2.06 o 
   4  15   3        0.13       -2.56      1.84 o 
  -2 -14   4        3.35        2.09      2.08 o 
  -1 -14   4        5.56        2.96      2.25 o 
  -5 -13   4       34.74       36.36      3.10 o 
  -4 -13   4        0.57        0.20      1.87 o 
  -3 -13   4        0.57        1.49      2.72 o 
  -2 -13   4       43.93       43.69      6.09 o 
  -1 -13   4        7.91        3.47      4.15 o 
   0 -13   4       31.16       22.86      2.97 o 
   1 -13   4        0.61        0.43      2.27 o 
   2 -13   4       13.10        7.98      2.57 o 
  -6 -12   4        3.19       -1.18      2.39 o 
  -5 -12   4        0.53       -0.67      2.30 o 
  -4 -12   4       42.53       34.89      2.79 o 
  -3 -12   4        0.91        0.93      1.71 o 
  -2 -12   4        0.25        0.54      1.77 o 
  -1 -12   4        1.51        0.12      1.58 o 
   0 -12   4        3.69        4.66      2.01 o 
   1 -12   4        0.36       -0.46      1.94 o 
   2 -12   4        1.55        1.20      1.92 o 
   3 -12   4       56.12       61.96      5.83 o 
  -7 -11   4       15.22       15.79      3.69 o 
  -6 -11   4       15.64       10.00      2.80 o 
  -5 -11   4        3.95        3.84      1.72 o 
  -4 -11   4       11.64       13.79      2.06 o 
  -3 -11   4        2.53        2.14      1.38 o 
  -2 -11   4        6.22        5.63      1.71 o 
  -1 -11   4        0.28       -0.26      3.11 o 
   0 -11   4       56.29       61.64      3.80 o 
   1 -11   4       22.47       20.30      2.77 o 
   2 -11   4        4.13        7.24      2.20 o 
   3 -11   4        0.46       -2.68      1.78 o 
   4 -11   4        0.05       -1.04      2.92 o 
   5 -11   4        6.50       12.17      2.33 o 
  -7 -10   4       47.25       48.93      5.12 o 
  -6 -10   4       30.94       28.66      3.52 o 
  -5 -10   4      293.34      306.48      6.05 o 
  -4 -10   4      423.62      455.98     10.93 o 
  -3 -10   4        0.90       -0.97      1.39 o 
  -2 -10   4       20.48       30.73      4.06 o 
  -1 -10   4        0.00        1.15      1.53 o 
   0 -10   4       49.53       37.27      4.92 o 
   1 -10   4        6.81        4.07      1.87 o 
   2 -10   4       29.27       32.97      3.16 o 
   3 -10   4        1.18        1.51      1.82 o 
   4 -10   4        0.04        1.06      1.51 o 
   5 -10   4       55.72       76.73      5.56 o 
  -8  -9   4        1.11        1.61      2.66 o 
  -7  -9   4       24.20       26.89      3.48 o 
  -6  -9   4       10.00       10.55      2.52 o 
  -5  -9   4        2.78        3.26      1.56 o 
  -4  -9   4      225.82      227.43      4.96 o 
  -3  -9   4       99.35       94.76      4.18 o 
  -2  -9   4        2.73        3.09      1.47 o 
  -1  -9   4       14.94       13.28      2.27 o 
   0  -9   4       19.46       17.64      1.94 o 
   1  -9   4        3.36        5.84      1.82 o 
   2  -9   4       20.55       20.56      2.04 o 
   3  -9   4        1.50       -0.38      1.27 o 
   4  -9   4       15.49       22.12      2.22 o 
   5  -9   4        5.06        8.12      1.92 o 
   6  -9   4       24.96       27.81      3.80 o 
  -8  -8   4        0.16        0.22      2.15 o 
  -7  -8   4        6.13        5.97      2.25 o 
  -6  -8   4        2.03        2.13      1.96 o 
  -5  -8   4      596.20      600.80     11.23 o 
  -4  -8   4       85.09       91.53      3.26 o 
  -3  -8   4       39.81       38.72      2.82 o 
  -2  -8   4       41.90       41.67      2.46 o 
  -1  -8   4        6.21        5.59      2.08 o 
   0  -8   4       15.50       20.28      1.87 o 
   1  -8   4        0.02        1.54      1.06 o 
   2  -8   4        2.70        4.26      1.41 o 
   3  -8   4        4.17        2.60      1.39 o 
   4  -8   4        1.77        3.42      1.42 o 
   5  -8   4        1.76        3.60      1.55 o 
   6  -8   4       23.59       19.18      3.36 o 
   7  -8   4        0.07       -0.78      2.79 o 
  -9  -7   4        0.00        0.70      2.49 o 
  -8  -7   4        7.13        5.47      2.33 o 
  -7  -7   4        5.42        5.42      2.23 o 
  -6  -7   4       25.72       22.75      2.82 o 
  -5  -7   4      134.89      134.41      3.65 o 
  -4  -7   4       38.88       47.57      2.55 o 
  -3  -7   4        3.05        3.91      1.30 o 
  -2  -7   4        7.72       11.17      1.54 o 
  -1  -7   4       33.94       31.13      1.76 o 
   0  -7   4        4.25        2.12      0.91 o 
   1  -7   4      233.80      238.20      3.67 o 
   2  -7   4        0.83        0.36      1.03 o 
   3  -7   4        8.28        5.51      3.25 o 
   4  -7   4        7.80        9.15      2.04 o 
   5  -7   4        7.90        7.80      1.66 o 
   6  -7   4       22.13       17.23      3.20 o 
   7  -7   4        0.07       -0.23      2.52 o 
  -9  -6   4        6.51        6.17      2.83 o 
  -8  -6   4        3.09        1.06      2.18 o 
  -7  -6   4        0.00       -0.56      1.81 o 
  -6  -6   4        0.13       -1.17      1.53 o 
  -5  -6   4        2.20        0.62      1.11 o 
  -4  -6   4        2.90        1.60      1.16 o 
  -3  -6   4      611.34      602.41      9.81 o 
  -2  -6   4        5.61        4.27      1.05 o 
   0  -6   4       30.51       23.61      1.35 o 
   1  -6   4      320.10      349.62      4.22 o 
   2  -6   4       60.27       59.53      2.16 o 
   3  -6   4        0.32        0.51      0.96 o 
   4  -6   4       10.84       12.62      1.37 o 
   5  -6   4       50.85       49.27      4.59 o 
   6  -6   4        0.74       -0.90      2.23 o 
   7  -6   4       81.76      102.30      5.77 o 
   8  -6   4       33.65       37.55      4.22 o 
  -9  -5   4        2.39        2.83      2.49 o 
  -8  -5   4       10.34       11.76      4.80 o 
  -7  -5   4       13.32       13.12      2.51 o 
  -6  -5   4       63.91       76.88      6.74 o 
  -5  -5   4        8.94       11.10      1.50 o 
  -4  -5   4      129.42      123.52      2.39 o 
  -3  -5   4      100.56      102.12      3.79 o 
  -2  -5   4       52.69       43.43      1.97 o 
  -1  -5   4        6.33        6.10      1.09 o 
   0  -5   4        0.89        0.95      0.64 o 
   1  -5   4       38.49       48.39      1.75 o 
   2  -5   4        0.01       -0.05      0.86 o 
   3  -5   4       84.26       99.32      2.46 o 
   4  -5   4        1.08        2.34      1.04 o 
   5  -5   4      170.00      153.96      3.28 o 
   6  -5   4        0.02       -3.09      2.15 o 
   8  -5   4       36.06       42.73      4.25 o 
  -9  -4   4        0.07       -0.92      2.29 o 
  -8  -4   4        0.02       -0.68      2.05 o 
  -7  -4   4       66.04       65.55      4.16 o 
  -6  -4   4        3.12        1.29      1.42 o 
  -5  -4   4        0.48        0.68      0.89 o 
  -4  -4   4      178.29      197.07      2.98 o 
  -3  -4   4      185.78      170.20      2.35 o 
  -2  -4   4      150.12      149.24      2.96 o 
  -1  -4   4      631.25      764.98      7.36 o 
   0  -4   4       74.50       84.19      1.87 o 
   1  -4   4      108.27       89.21      3.67 o 
   2  -4   4        8.70        9.51      1.34 o 
   3  -4   4      962.29      941.01      7.61 o 
   4  -4   4      110.55      102.34      2.57 o 
   5  -4   4        0.01       -0.10      0.94 o 
   6  -4   4       30.95       32.83      2.44 o 
   7  -4   4        7.34       10.67      2.88 o 
   8  -4   4       70.45       82.92      9.53 o 
   9  -4   4        0.77        0.31      2.88 o 
  -9  -3   4        2.60       -1.91      5.12 o 
  -8  -3   4       54.31       60.74      3.42 o 
  -7  -3   4      393.41      404.58      9.88 o 
  -6  -3   4        3.36        4.30      1.52 o 
  -5  -3   4      120.51      132.89      2.69 o 
  -4  -3   4       17.59       18.42      1.68 o 
  -3  -3   4     2753.69     2961.59     17.45 o 
  -2  -3   4     1825.31     1784.39     13.40 o 
  -1  -3   4      199.57      214.05      3.28 o 
   0  -3   4      807.04      672.73      5.89 o 
   2  -3   4     5493.75     5613.44     31.01 o 
   3  -3   4      114.45      104.99      2.25 o 
   4  -3   4        9.77       10.53      1.07 o 
   5  -3   4        6.61        5.54      1.07 o 
   6  -3   4        2.70        5.48      1.65 o 
   7  -3   4      220.81      255.13      5.61 o 
   8  -3   4        0.03       -1.77      1.77 o 
   9  -3   4        0.10       -3.66      4.47 o 
  -9  -2   4        5.00        5.92      2.10 o 
  -8  -2   4      439.04      452.68      7.61 o 
  -7  -2   4       21.02       17.23      2.09 o 
  -6  -2   4       42.26       37.38      2.41 o 
  -5  -2   4        0.02        0.48      0.90 o 
  -4  -2   4      993.97     1049.16      9.15 o 
  -3  -2   4       52.29       59.40      1.98 o 
  -2  -2   4      428.01      440.81      3.79 o 
   1  -2   4     2928.15     2790.95     16.14 o 
   3  -2   4      246.22      241.76      3.09 o 
   4  -2   4        0.03       -1.04      0.69 o 
   5  -2   4        0.19        0.94      0.86 o 
   6  -2   4        3.92        2.88      1.53 o 
   7  -2   4      121.42      133.66      4.19 o 
   8  -2   4       17.93       21.21      2.42 o 
   9  -2   4        1.01        1.22      1.86 o 
  -9  -1   4        3.82        5.54      2.13 o 
  -8  -1   4      230.52      234.49      6.35 o 
  -7  -1   4      343.51      349.40      6.22 o 
  -6  -1   4        0.09       -0.09      2.24 o 
  -5  -1   4       78.67       88.27      2.33 o 
  -4  -1   4        8.76        8.88      0.98 o 
  -3  -1   4     3343.30     3901.89     22.14 o 
  -2  -1   4       49.33       56.21      1.40 o 
  -1  -1   4     1489.22     1446.37      9.30 o 
   0  -1   4      150.28      167.03      2.23 o 
   1  -1   4      288.75      259.92      2.71 o 
   2  -1   4     7391.94     7333.48     39.09 o 
   3  -1   4        1.15        1.13      0.62 o 
   4  -1   4        4.23        3.60      0.80 o 
   5  -1   4       31.42       29.45      1.70 o 
   6  -1   4        0.38       -0.54      1.31 o 
   7  -1   4       27.76       28.49      2.36 o 
   8  -1   4        1.93        3.04      1.72 o 
   9  -1   4        4.47        4.19      1.91 o 
  -9   0   4       44.19       43.57      3.38 o 
  -8   0   4      111.53      118.69      4.39 o 
  -7   0   4        5.71        4.87      1.73 o 
  -6   0   4       43.58       46.67      2.67 o 
  -5   0   4       16.18       14.89      1.31 o 
  -2   0   4     1790.94     1950.15     11.84 o 
  -1   0   4       47.37       51.80      1.23 o 
   0   0   4     1064.45     1108.30      7.00 o 
   1   0   4      565.67      573.28      6.57 o 
   2   0   4        0.49        0.47      0.48 o 
   3   0   4       38.73       47.80      1.40 o 
   4   0   4       61.51       66.00      1.74 o 
   5   0   4        1.39        2.20      0.99 o 
   6   0   4       38.39       31.36      2.14 o 
   7   0   4        2.34        3.22      1.45 o 
   8   0   4        0.15       -2.27      1.51 o 
   9   0   4        5.16        3.87      1.96 o 
  10   0   4        4.43       -1.75      2.02 o 
  -9   1   4        8.78        6.61      2.17 o 
  -8   1   4       26.97       26.72      2.67 o 
  -7   1   4       19.97       20.03      2.23 o 
  -6   1   4       81.46       88.88      4.96 o 
  -5   1   4       12.35       13.89      1.24 o 
  -4   1   4        7.21        6.56      1.16 o 
  -3   1   4      899.80      869.49      6.67 o 
  -1   1   4     1029.51     1026.57      7.47 o 
   0   1   4        0.49       -0.46      0.38 o 
   1   1   4       77.44       84.22      1.28 o 
   2   1   4       92.05       96.64      1.74 o 
   3   1   4      423.43      436.12      3.89 o 
   4   1   4      275.57      316.24      3.46 o 
   5   1   4      115.51      110.17      2.14 o 
   6   1   4        1.23        0.35      1.25 o 
   7   1   4       19.12       20.03      2.04 o 
   8   1   4        4.27        5.31      1.67 o 
   9   1   4        7.04        6.84      2.03 o 
  10   1   4        1.01       -2.57      1.94 o 
  -9   2   4       10.75       10.55      2.85 o 
  -8   2   4        1.22        1.94      2.87 o 
  -7   2   4       88.83       87.40      3.58 o 
  -6   2   4        0.01       -0.31      1.47 o 
  -5   2   4        0.94        1.13      0.96 o 
  -4   2   4      116.62      103.95      2.40 o 
  -3   2   4       13.59       12.86      0.99 o 
  -2   2   4       34.20       43.41      1.95 o 
  -1   2   4       13.08       11.28      0.75 o 
   0   2   4      154.92      168.15      2.73 o 
   1   2   4       14.99       14.33      0.92 o 
   2   2   4      119.69      117.51      1.63 o 
   3   2   4       49.55       40.96      1.27 o 
   4   2   4     2167.23     2033.52     12.60 o 
   5   2   4       74.96       65.32      1.77 o 
   6   2   4       20.39       17.27      1.76 o 
   7   2   4       30.34       29.44      2.28 o 
   8   2   4        1.58       -0.15      1.48 o 
   9   2   4       26.05       27.58      2.68 o 
  10   2   4        4.88        4.66      2.18 o 
  -9   3   4        0.03       -0.83      2.29 o 
  -8   3   4       13.94       15.92      2.84 o 
  -7   3   4        1.59        1.64      1.64 o 
  -6   3   4       22.68       13.93      1.91 o 
  -5   3   4        0.21        0.58      0.98 o 
  -4   3   4       78.21       99.07      2.71 o 
  -3   3   4       12.27       14.11      1.09 o 
  -2   3   4      508.32      546.99      4.84 o 
  -1   3   4       33.83       43.23      1.35 o 
   0   3   4      304.73      324.30      3.05 o 
   1   3   4      574.71      525.09      4.00 o 
   2   3   4       46.76       43.83      1.25 o 
   3   3   4      349.91      377.20      3.59 o 
   4   3   4      936.01      903.14      6.83 o 
   5   3   4      549.45      541.34      4.95 o 
   6   3   4       13.55       14.59      1.64 o 
   7   3   4        1.53        0.94      1.40 o 
   8   3   4        0.12       -0.12      1.43 o 
   9   3   4        2.24        3.84      2.13 o 
  10   3   4        5.21        6.47      2.21 o 
  -9   4   4        2.45        2.78      2.47 o 
  -8   4   4       26.39       18.99      3.10 o 
  -7   4   4        8.53        2.74      2.19 o 
  -6   4   4       92.93       81.06      4.39 o 
  -5   4   4        5.94        6.53      1.23 o 
  -4   4   4        0.51        0.29      0.94 o 
  -3   4   4      512.26      422.94      4.93 o 
  -2   4   4        0.17       -0.65      0.64 o 
  -1   4   4     1034.58     1044.44      7.43 o 
   0   4   4      854.27      847.99     10.84 o 
   1   4   4       28.83       27.52      1.10 o 
   2   4   4       31.11       35.28      2.26 o 
   3   4   4      104.52      100.57      1.89 o 
   4   4   4    13303.71    12835.11     67.46 o 
   5   4   4        2.62        2.22      0.87 o 
   6   4   4        2.43        4.50      1.34 o 
   7   4   4        9.68        6.97      1.66 o 
   8   4   4        8.05        8.62      1.97 o 
   9   4   4       21.52       19.75      2.39 o 
  10   4   4        0.11       -2.36      1.77 o 
  -8   5   4        0.54        1.98      2.27 o 
  -7   5   4       12.01        8.67      2.52 o 
  -6   5   4      346.39      305.50      7.42 o 
  -5   5   4       19.02       18.14      2.87 o 
  -4   5   4        0.19        1.10      1.04 o 
  -3   5   4       19.43       20.48      1.50 o 
  -2   5   4       69.80       76.81      2.02 o 
  -1   5   4       90.84      108.18      2.15 o 
   0   5   4       22.71       21.32      1.06 o 
   1   5   4      276.06      311.07      3.29 o 
   2   5   4      145.42      155.50      2.31 o 
   3   5   4     1510.27     1515.33     10.09 o 
   4   5   4      204.02      188.49      8.96 o 
   5   5   4      219.54      223.07      3.23 o 
   6   5   4        8.18        9.85      1.52 o 
   7   5   4        0.01        1.68      1.62 o 
   8   5   4        4.23        5.02      3.00 o 
   9   5   4        6.00        5.15      1.84 o 
  10   5   4        3.07        1.03      2.78 o 
  -8   6   4        0.02       -1.29      2.23 o 
  -7   6   4       10.50        7.75      2.60 o 
  -6   6   4       23.88       16.04      2.66 o 
  -5   6   4      153.30      142.61      5.03 o 
  -4   6   4       99.07       99.10      4.39 o 
  -3   6   4       19.82       16.94      1.73 o 
  -2   6   4        4.06        3.24      1.08 o 
  -1   6   4     2542.28     2683.35     26.58 o 
   0   6   4      141.34      137.17      2.14 o 
   1   6   4       16.63       10.60      0.78 o 
   2   6   4      156.32      150.45      2.42 o 
   3   6   4     1898.51     1854.32     12.09 o 
   4   6   4     1256.76     1226.36     12.57 o 
   5   6   4       20.29       26.25      1.48 o 
   6   6   4        6.36        7.55      1.55 o 
   7   6   4       12.34       13.33      1.74 o 
   8   6   4       10.72       11.55      1.86 o 
   9   6   4        1.46        3.67      2.64 o 
  10   6   4        1.00        0.42      1.91 o 
  -7   7   4      140.83      124.95      6.16 o 
  -6   7   4       10.75        7.39      2.61 o 
  -5   7   4       16.96       20.54      2.07 o 
  -4   7   4        4.01        3.06      1.47 o 
  -3   7   4       59.81       63.49      2.82 o 
  -2   7   4      404.31      420.60      5.02 o 
  -1   7   4      149.06      134.20      3.31 o 
   0   7   4       19.94       23.10      1.97 o 
   1   7   4       70.43       77.56      1.95 o 
   2   7   4        2.82        4.00      0.75 o 
   3   7   4      116.03      128.64      2.22 o 
   4   7   4        1.21        3.10      1.01 o 
   5   7   4        4.75        3.61      0.99 o 
   6   7   4       26.04       26.19      2.08 o 
   7   7   4        1.72        0.83      1.30 o 
   8   7   4        0.42       -1.48      1.52 o 
   9   7   4        0.12       -0.89      1.61 o 
  -7   8   4        0.28       -2.20      2.20 o 
  -6   8   4       23.00       33.46      4.86 o 
  -5   8   4        4.80        3.02      2.33 o 
  -4   8   4      105.12      101.00      5.49 o 
  -3   8   4       41.56       33.19      2.36 o 
  -2   8   4        8.90        7.93      1.45 o 
  -1   8   4      141.25      132.83      3.43 o 
   0   8   4        0.06        0.55      0.72 o 
   1   8   4        0.25       -0.06      0.75 o 
   2   8   4        0.59        0.76      0.94 o 
   3   8   4       16.13       16.13      1.29 o 
   4   8   4       27.80       28.73      1.58 o 
   5   8   4       32.41       35.58      1.84 o 
   6   8   4       65.47       60.32      2.83 o 
   7   8   4        0.01       -0.07      1.28 o 
   8   8   4        4.58        2.34      1.64 o 
   9   8   4        2.95        3.38      1.90 o 
  -6   9   4        6.75        9.46      2.79 o 
  -5   9   4      115.12      105.77      3.89 o 
  -4   9   4        0.40        2.59      1.50 o 
  -3   9   4        1.73        2.08      1.16 o 
  -2   9   4        0.00       -1.96      1.31 o 
  -1   9   4       80.23       73.80      2.97 o 
   0   9   4        7.58        7.30      1.39 o 
   1   9   4        0.68       -0.10      0.83 o 
   2   9   4       10.53       11.42      1.23 o 
   3   9   4        0.13        0.06      0.82 o 
   4   9   4       18.68       20.83      1.56 o 
   5   9   4        6.64        4.96      1.16 o 
   6   9   4       72.82       69.42      3.37 o 
   7   9   4        1.78        1.77      1.49 o 
   8   9   4        0.34        0.90      1.58 o 
   9   9   4        0.11       -2.07      1.80 o 
  -6  10   4        0.00        3.20      2.52 o 
  -5  10   4       12.62       14.62      2.13 o 
  -4  10   4       36.67       38.02      2.84 o 
  -3  10   4        2.92        0.83      1.88 o 
  -2  10   4       27.43       18.76      2.96 o 
  -1  10   4       40.65       44.18      3.94 o 
   0  10   4       31.96       29.02      2.20 o 
   1  10   4        5.49        5.01      1.49 o 
   2  10   4       44.12       45.43      2.04 o 
   3  10   4        0.21       -0.22      0.95 o 
   4  10   4        0.00       -0.20      0.93 o 
   5  10   4       35.88       33.69      1.91 o 
   6  10   4       14.78       12.56      1.81 o 
   7  10   4       10.30       12.30      1.93 o 
   8  10   4        0.08       -1.74      1.51 o 
  -5  11   4       12.30       11.93      2.24 o 
  -4  11   4        1.61        2.00      1.58 o 
  -3  11   4        0.05        0.04      1.98 o 
  -2  11   4        0.13       -2.19      1.46 o 
  -1  11   4        0.22       -2.54      2.34 o 
   0  11   4       25.75       26.00      2.19 o 
   1  11   4      165.91      183.03      6.19 o 
   2  11   4       88.91       93.79      4.48 o 
   3  11   4        2.86        2.90      1.08 o 
   4  11   4        0.15       -0.71      0.91 o 
   5  11   4        1.92        1.89      1.13 o 
   6  11   4      124.95      127.05      4.16 o 
   7  11   4        0.66        0.31      1.53 o 
   8  11   4        0.07       -2.39      1.60 o 
  -4  12   4       11.69       17.07      2.40 o 
  -3  12   4        0.00        1.87      1.50 o 
  -2  12   4        8.39       11.12      3.54 o 
  -1  12   4       14.52       15.60      2.11 o 
   0  12   4      507.82      511.46      7.64 o 
   1  12   4        7.06       10.18      1.79 o 
   2  12   4       24.07       27.44      2.21 o 
   3  12   4        7.29        4.72      1.38 o 
   4  12   4       14.22       17.40      1.65 o 
   5  12   4       51.65       52.62      2.62 o 
   6  12   4        5.93        8.81      2.96 o 
   7  12   4        0.87        2.18      1.74 o 
  -3  13   4        0.01        1.00      1.71 o 
  -2  13   4        0.00       -1.07      1.54 o 
  -1  13   4        1.20        0.03      1.52 o 
   0  13   4        0.73       -0.11      1.59 o 
   1  13   4      384.86      451.78      7.31 o 
   2  13   4        0.10       -1.00      1.89 o 
   3  13   4        8.85        9.08      1.73 o 
   4  13   4        3.72        1.38      1.43 o 
   5  13   4       28.72       27.86      2.34 o 
   6  13   4        1.97        2.54      4.11 o 
   7  13   4        1.18        5.31      4.02 o 
  -2  14   4       10.17        9.98      2.12 o 
  -1  14   4        0.12       -0.19      1.52 o 
   0  14   4       86.47       95.27      6.05 o 
   1  14   4        1.27        4.61      1.74 o 
   2  14   4        4.15        3.66      1.65 o 
   3  14   4        0.95        0.89      1.42 o 
   4  14   4        9.76       10.34      1.88 o 
   5  14   4        2.36        0.30      1.84 o 
   0  15   4        5.58        4.18      2.99 o 
   1  15   4        4.28        1.65      3.41 o 
   2  15   4        0.42        1.13      2.21 o 
   3  15   4        0.80       -0.65      2.01 o 
   4  15   4        0.17       -2.39      1.92 o 
  -4 -13   5        0.27       -0.66      1.74 o 
  -3 -13   5        2.18        5.67      2.18 o 
  -2 -13   5        0.45        2.40      2.06 o 
  -1 -13   5        1.11       -2.36      3.24 o 
   0 -13   5        4.81        4.90      2.40 o 
   1 -13   5        0.00        0.20      1.88 o 
  -5 -12   5        0.23       -0.33      1.61 o 
  -4 -12   5        1.86        0.95      1.71 o 
  -3 -12   5        4.49        1.10      1.77 o 
  -2 -12   5        3.04        3.13      1.82 o 
  -1 -12   5       30.50       27.74      2.99 o 
   0 -12   5        2.73        0.40      1.84 o 
   1 -12   5        3.90        2.81      1.90 o 
   2 -12   5       63.40       53.19      4.23 o 
   3 -12   5        0.48        0.37      1.90 o 
  -6 -11   5       29.01       26.92      3.69 o 
  -5 -11   5        7.03        8.21      1.97 o 
  -4 -11   5       12.29       10.89      1.99 o 
  -3 -11   5       30.37       28.84      2.32 o 
  -2 -11   5        9.83       10.57      2.40 o 
  -1 -11   5        0.73        1.54      3.37 o 
   0 -11   5        0.49       -1.42      1.63 o 
   1 -11   5        9.15        9.25      2.27 o 
   2 -11   5        0.10       -0.08      1.81 o 
   3 -11   5       23.75       28.89      3.28 o 
   4 -11   5        0.43       -0.46      3.30 o 
  -7 -10   5        2.78       -0.25      2.30 o 
  -6 -10   5       25.27       23.62      5.25 o 
  -5 -10   5       47.66       57.68      3.23 o 
  -4 -10   5       23.66       26.86      2.53 o 
  -3 -10   5      334.11      336.41      6.36 o 
  -2 -10   5        3.01        2.39      1.55 o 
  -1 -10   5      215.87      172.38      4.69 o 
   0 -10   5        1.20       -0.33      1.49 o 
   1 -10   5      118.66      107.07      4.54 o 
   2 -10   5       89.38       76.86      4.73 o 
   3 -10   5        4.57        2.27      2.07 o 
   4 -10   5        0.43        0.06      1.84 o 
   5 -10   5        6.12        5.94      1.93 o 
  -7  -9   5        0.24        2.05      2.27 o 
  -6  -9   5       18.05       19.06      3.10 o 
  -5  -9   5        9.27       10.29      2.65 o 
  -4  -9   5      828.10      872.11     10.38 o 
  -3  -9   5       24.90       22.48      2.26 o 
  -2  -9   5       18.26       18.90      2.13 o 
  -1  -9   5        1.70       -0.93      1.28 o 
   0  -9   5       33.37       33.81      3.70 o 
   1  -9   5       14.00        7.54      1.89 o 
   2  -9   5       33.53       41.13      3.20 o 
   3  -9   5       53.77       52.46      4.33 o 
   4  -9   5        1.54        2.09      1.57 o 
   5  -9   5        2.09        7.71      1.93 o 
   6  -9   5        8.51        7.25      4.08 o 
  -8  -8   5        0.69       -2.92      2.92 o 
  -7  -8   5        4.81        4.25      4.15 o 
  -6  -8   5       74.03       76.00      4.52 o 
  -5  -8   5       44.79       54.98      5.60 o 
  -4  -8   5       70.95       60.40      2.89 o 
  -3  -8   5      508.55      483.31      7.08 o 
  -2  -8   5       72.28       70.46      3.13 o 
  -1  -8   5       13.32       13.03      1.84 o 
   0  -8   5        0.05        0.40      1.43 o 
   1  -8   5      114.73       96.77      3.28 o 
   2  -8   5        0.21        1.11      1.24 o 
   3  -8   5      105.50      107.57      5.13 o 
   4  -8   5       16.68       15.64      1.99 o 
   5  -8   5       10.58       16.36      2.10 o 
   6  -8   5       11.51       16.40      3.23 o 
   7  -8   5        0.32        0.18      2.82 o 
  -8  -7   5       28.92       30.72      4.47 o 
  -7  -7   5       22.39       18.60      2.86 o 
  -6  -7   5        0.22       -2.66      1.77 o 
  -5  -7   5      106.39      109.62      3.49 o 
  -4  -7   5      324.47      322.56      5.55 o 
  -3  -7   5      606.46      584.21      7.56 o 
  -2  -7   5       88.88       90.82      6.00 o 
  -1  -7   5       15.53       12.09      1.44 o 
   0  -7   5        0.87        4.86      1.41 o 
   1  -7   5        1.06        0.82      1.08 o 
   2  -7   5       10.96       10.08      1.34 o 
   3  -7   5        0.08       -0.91      1.27 o 
   4  -7   5       26.48       30.18      2.35 o 
   5  -7   5        2.57        1.86      1.48 o 
   6  -7   5        0.35       -0.06      2.34 o 
   7  -7   5        5.40        3.40      2.98 o 
  -9  -6   5       48.27       63.66      5.13 o 
  -8  -6   5        1.61        1.03      2.30 o 
  -7  -6   5        4.99        2.93      3.76 o 
  -6  -6   5       21.09       23.60      2.82 o 
  -5  -6   5       45.54       44.35      3.73 o 
  -4  -6   5       12.13        9.70      1.57 o 
  -3  -6   5        1.64        3.20      1.25 o 
  -2  -6   5       22.47       20.77      2.99 o 
  -1  -6   5        3.65       12.53      3.14 o 
   0  -6   5       23.52       20.67      1.24 o 
   1  -6   5       27.63       21.79      1.48 o 
   2  -6   5       42.21       45.84      1.97 o 
   3  -6   5       46.63       52.53      2.17 o 
   4  -6   5        0.01        1.08      1.10 o 
   5  -6   5        4.90        5.33      1.75 o 
   6  -6   5        9.19        6.46      2.74 o 
   7  -6   5       25.64       22.39      4.92 o 
   8  -6   5       16.65       15.59      5.31 o 
  -9  -5   5       19.12       17.85      3.89 o 
  -8  -5   5       12.31        8.48      2.58 o 
  -7  -5   5        1.62       -3.40      2.27 o 
  -6  -5   5        4.08        5.48      2.15 o 
  -5  -5   5       34.62       37.58      2.57 o 
  -4  -5   5       30.72       31.41      2.00 o 
  -3  -5   5       90.58       94.38      5.20 o 
  -2  -5   5       11.14       10.51      1.35 o 
  -1  -5   5      159.37      147.84      5.03 o 
   0  -5   5       29.58       23.73      1.19 o 
   2  -5   5      510.02      538.48      5.56 o 
   3  -5   5       26.20       19.29      1.46 o 
   4  -5   5        5.41        3.52      1.11 o 
   5  -5   5        0.22       -1.12      1.01 o 
   6  -5   5      235.43      243.55     16.33 o 
   7  -5   5        0.27       -0.77      3.05 o 
   8  -5   5       57.84       57.43      4.81 o 
  -9  -4   5        7.37        8.31      2.80 o 
  -8  -4   5        1.03       -0.87      2.40 o 
  -7  -4   5       22.74       23.47      3.63 o 
  -6  -4   5       19.81       20.37      2.68 o 
  -5  -4   5        3.16        3.82      1.26 o 
  -4  -4   5       45.77       52.33      3.85 o 
  -3  -4   5       61.27       65.10      2.45 o 
  -2  -4   5     1272.95     1299.36     11.21 o 
  -1  -4   5        2.09        2.44      1.46 o 
   0  -4   5      133.07      156.66      3.25 o 
   1  -4   5        0.18        0.32      0.72 o 
   2  -4   5       68.52       85.17      2.26 o 
   3  -4   5        5.14        4.25      1.00 o 
   4  -4   5       56.60       54.49      2.09 o 
   5  -4   5      104.29       96.47      2.72 o 
   6  -4   5       28.86       31.01      2.46 o 
   7  -4   5        1.19       -2.88      2.12 o 
   8  -4   5       11.94        7.16      3.02 o 
  -9  -3   5       39.63       41.68      4.20 o 
  -8  -3   5        0.63       -1.94      1.99 o 
  -7  -3   5       11.44       10.75      2.55 o 
  -6  -3   5        1.26        1.00      1.47 o 
  -5  -3   5       15.73       15.12      1.34 o 
  -4  -3   5       20.27       24.68      1.37 o 
  -3  -3   5      259.79      296.23      3.97 o 
  -2  -3   5       39.70       36.29      1.79 o 
   0  -3   5        2.15        1.40      0.57 o 
   1  -3   5     2041.62     2344.24     14.37 o 
   2  -3   5       11.56        9.86      0.97 o 
   4  -3   5      643.47      638.47      7.48 o 
   5  -3   5       41.79       43.03      1.97 o 
   6  -3   5       33.21       30.41      2.40 o 
   7  -3   5        6.01        8.73      2.76 o 
   8  -3   5      362.57      420.05      7.59 o 
   9  -3   5       11.39       19.02      3.76 o 
  -9  -2   5        9.33        8.59      2.92 o 
  -8  -2   5        0.19       -2.98      1.99 o 
  -7  -2   5      302.76      322.74      9.69 o 
  -6  -2   5       22.17       29.52      2.68 o 
  -5  -2   5       99.60      114.06      2.66 o 
  -4  -2   5       15.89       18.23      1.27 o 
  -3  -2   5      115.70      126.19      2.28 o 
  -2  -2   5     5001.44     5411.78     29.73 o 
  -1  -2   5      535.42      488.44      4.06 o 
   0  -2   5      976.92      960.75      7.67 o 
   1  -2   5       22.16       20.25      1.33 o 
   2  -2   5        2.87        1.24      0.71 o 
   3  -2   5      172.14      162.61      4.04 o 
   4  -2   5       86.02       89.54      4.43 o 
   5  -2   5        2.59        1.58      1.02 o 
   6  -2   5       19.61       20.56      4.17 o 
   7  -2   5      163.81      194.92      4.92 o 
   8  -2   5       10.17       10.71      2.24 o 
   9  -2   5        9.61       13.06      2.45 o 
  -9  -1   5        6.08        4.98      2.06 o 
  -8  -1   5        5.74        1.82      1.86 o 
  -7  -1   5      159.89      180.87      5.33 o 
  -6  -1   5      263.33      275.59      5.33 o 
  -5  -1   5        2.55        3.02      1.10 o 
  -4  -1   5      186.49      180.40      3.01 o 
  -3  -1   5       80.27       78.13      2.01 o 
  -2  -1   5      232.17      260.19      2.97 o 
  -1  -1   5      552.31      557.12      4.47 o 
   0  -1   5       10.66       17.55      1.34 o 
   2  -1   5        4.47        5.37      0.75 o 
   3  -1   5     1415.14     1433.23     10.87 o 
   4  -1   5        7.54        6.52      1.03 o 
   5  -1   5        1.08        1.70      0.89 o 
   6  -1   5        0.73        0.08      1.35 o 
   7  -1   5      121.42      134.59      4.57 o 
   8  -1   5       19.80       22.04      2.41 o 
   9  -1   5        6.17        5.98      2.15 o 
  -9   0   5        0.33       -0.04      1.91 o 
  -8   0   5       43.56       50.22      3.39 o 
  -7   0   5      282.19      302.34      6.05 o 
  -6   0   5      364.98      362.45      6.07 o 
  -5   0   5      248.98      240.60      3.72 o 
  -4   0   5        0.04        0.88      0.86 o 
  -3   0   5     1156.25     1269.85      9.01 o 
  -2   0   5      198.18      228.07      4.77 o 
  -1   0   5       46.98       55.91      2.39 o 
   0   0   5      590.99      585.97      8.62 o 
   1   0   5       24.31       30.17      1.80 o 
   2   0   5      117.79      101.26      1.86 o 
   3   0   5      263.44      250.00      3.11 o 
   4   0   5        5.27        5.74      1.28 o 
   5   0   5       52.60       46.62      1.79 o 
   6   0   5        1.69        1.15      1.32 o 
   7   0   5       40.94       41.16      2.62 o 
   8   0   5       10.68       12.05      2.03 o 
   9   0   5        0.60       -3.20      2.13 o 
  -9   1   5       13.00       13.78      2.49 o 
  -8   1   5        4.71        2.17      1.96 o 
  -7   1   5     1454.35     1468.09     26.93 o 
  -6   1   5        6.99       10.27      1.91 o 
  -5   1   5      163.05      172.30      3.89 o 
  -4   1   5       50.46       52.93      2.05 o 
  -2   1   5      551.89      522.44      4.63 o 
  -1   1   5       28.88       29.32      1.14 o 
   0   1   5      293.86      308.92      3.29 o 
   1   1   5      262.83      260.87      2.59 o 
   2   1   5      583.83      587.63      4.66 o 
   3   1   5      406.60      392.34      3.82 o 
   4   1   5       12.53       15.86      1.07 o 
   5   1   5      115.50      122.61      4.10 o 
   6   1   5        7.66       10.10      1.61 o 
   7   1   5        3.81        3.30      1.60 o 
   8   1   5       12.32        9.24      1.92 o 
   9   1   5        0.02        1.55      1.84 o 
  10   1   5        3.47       -0.60      3.84 o 
  -9   2   5        4.44        4.28      2.34 o 
  -8   2   5        3.42        1.21      1.81 o 
  -7   2   5       61.37       66.41      3.41 o 
  -6   2   5        0.34        2.12      1.50 o 
  -5   2   5        8.28        7.47      1.45 o 
  -4   2   5       34.35       34.81      1.90 o 
  -3   2   5       78.25       72.67      3.31 o 
  -2   2   5      108.41      109.73      2.53 o 
  -1   2   5       28.67       25.40      1.52 o 
   0   2   5        0.25        0.36      0.71 o 
   1   2   5        7.90        3.72      0.70 o 
   2   2   5       22.75       20.50      1.20 o 
   3   2   5       15.59       11.03      1.10 o 
   4   2   5       78.60       77.65      1.89 o 
   5   2   5        0.82       -0.15      0.78 o 
   6   2   5       14.24       13.54      1.70 o 
   7   2   5        8.57        8.24      1.69 o 
   8   2   5        4.14        7.10      1.72 o 
   9   2   5        1.24        2.19      1.74 o 
  10   2   5       13.39        8.33      2.38 o 
  -9   3   5        3.63        5.93      2.52 o 
  -8   3   5        3.05        3.22      2.23 o 
  -7   3   5       19.92       12.02      2.01 o 
  -6   3   5        0.92        2.32      1.60 o 
  -5   3   5        0.22        3.05      1.15 o 
  -4   3   5        1.96        1.70      0.96 o 
  -3   3   5      240.16      215.56      3.24 o 
  -2   3   5       48.34       45.68      1.62 o 
  -1   3   5       15.95       15.63      0.96 o 
   0   3   5        3.00        2.63      0.56 o 
   1   3   5       10.37       12.41      1.25 o 
   2   3   5      206.28      225.03      2.37 o 
   3   3   5       35.66       31.94      1.24 o 
   4   3   5       10.08        8.27      0.97 o 
   5   3   5       21.80       24.58      1.61 o 
   6   3   5      124.33      115.78      3.39 o 
   7   3   5       27.98       27.28      3.22 o 
   8   3   5        2.79        5.02      1.63 o 
   9   3   5        9.49        9.62      2.09 o 
  10   3   5        0.05       -2.00      2.00 o 
  -8   4   5       32.65       28.28      4.34 o 
  -7   4   5       35.74       31.14      3.30 o 
  -6   4   5       22.74       22.26      4.34 o 
  -5   4   5        2.94        4.77      1.18 o 
  -4   4   5       78.05       79.38      2.52 o 
  -3   4   5       24.69       28.35      2.24 o 
  -1   4   5      257.37      270.90      3.26 o 
   0   4   5       33.80       30.91      1.70 o 
   1   4   5       48.55       49.68      1.81 o 
   2   4   5        9.57        9.15      0.70 o 
   3   4   5     1604.68     1593.34     10.39 o 
   5   4   5       43.07       40.92      1.74 o 
   6   4   5      189.50      201.20      4.35 o 
   7   4   5       16.31       16.16      1.94 o 
   8   4   5        9.62       12.14      1.96 o 
   9   4   5        5.47        3.51      2.08 o 
  10   4   5       17.95       15.98      2.88 o 
  -8   5   5        5.79        9.47      2.60 o 
  -7   5   5        5.64        5.18      2.38 o 
  -6   5   5       16.95       13.21      2.52 o 
  -5   5   5      115.88       96.89      6.52 o 
  -4   5   5        0.04        0.69      1.06 o 
  -3   5   5      195.65      212.69      3.48 o 
  -2   5   5       41.03       40.99      1.92 o 
  -1   5   5        0.00       -0.36      0.67 o 
   0   5   5      404.98      404.84      4.06 o 
   1   5   5      246.35      224.30      2.86 o 
   2   5   5        6.91        4.23      0.68 o 
   3   5   5      285.98      298.96      3.52 o 
   4   5   5      636.52      628.97      5.88 o 
   5   5   5       46.02       50.65      2.68 o 
   6   5   5        7.06        7.86      1.56 o 
   7   5   5        0.36       -1.52      1.20 o 
   8   5   5       20.19       19.22      2.12 o 
   9   5   5       19.58       17.52      2.28 o 
  10   5   5        0.40       -1.00      1.83 o 
  -8   6   5        0.73       -0.56      2.18 o 
  -7   6   5        2.34        3.90      2.34 o 
  -6   6   5       22.73       19.58      2.93 o 
  -5   6   5      374.86      328.88      7.68 o 
  -4   6   5        0.00        0.65      1.59 o 
  -3   6   5        0.03        2.00      1.51 o 
  -2   6   5      545.66      541.44      5.39 o 
  -1   6   5        6.02       10.24      1.01 o 
   0   6   5     1697.62     1751.54     11.60 o 
   1   6   5      115.84      127.59      2.30 o 
   2   6   5      102.63       99.94      2.10 o 
   3   6   5        6.13        7.86      0.93 o 
   4   6   5        5.68        8.92      1.05 o 
   5   6   5      101.79      107.02      2.55 o 
   6   6   5        4.56        3.14      1.40 o 
   7   6   5       64.95       58.99      3.30 o 
   8   6   5        6.05        6.97      1.70 o 
   9   6   5        3.57        4.96      2.01 o 
  -7   7   5        3.08        7.45      2.66 o 
  -6   7   5        8.28        5.40      2.42 o 
  -5   7   5        3.08        2.69      1.44 o 
  -4   7   5      206.51      177.15      4.40 o 
  -3   7   5      219.78      206.37      4.49 o 
  -2   7   5       10.32        9.92      1.50 o 
  -1   7   5       16.37       19.91      1.50 o 
   0   7   5        8.52        6.21      0.91 o 
   1   7   5      222.62      192.96      4.54 o 
   2   7   5        7.30        4.28      1.16 o 
   3   7   5       61.18       59.70      2.02 o 
   4   7   5      317.92      338.17      7.45 o 
   5   7   5       77.16       74.76      2.33 o 
   6   7   5        4.30       -0.33      1.42 o 
   7   7   5        1.34        2.96      1.49 o 
   8   7   5        0.52        1.96      1.51 o 
   9   7   5        0.90        1.27      1.67 o 
  -7   8   5        1.21        2.65      2.52 o 
  -6   8   5        0.00        3.71      2.72 o 
  -4   8   5        5.27        3.67      1.54 o 
  -3   8   5        8.09        6.10      1.52 o 
  -2   8   5       66.00       62.83      2.86 o 
  -1   8   5      130.41      143.69      3.66 o 
   0   8   5      590.21      557.43      5.55 o 
   1   8   5      103.19      110.20      2.53 o 
   2   8   5       96.67      112.72      2.54 o 
   3   8   5       36.01       43.58      1.88 o 
   4   8   5        9.63        7.42      1.16 o 
   5   8   5      137.75      138.67      2.75 o 
   6   8   5        2.12        1.32      2.27 o 
   7   8   5       12.08        9.90      1.84 o 
   8   8   5        0.62        0.01      1.48 o 
   9   8   5        0.19       -0.13      2.23 o 
  -6   9   5       17.12       17.72      3.50 o 
  -5   9   5        1.33        1.56      1.60 o 
  -4   9   5       22.82       23.62      2.31 o 
  -3   9   5        1.28        0.28      1.43 o 
  -2   9   5      112.91      108.52      3.69 o 
  -1   9   5       18.20       13.51      1.74 o 
   0   9   5       36.14       39.75      1.98 o 
   1   9   5       47.87       48.28      3.16 o 
   2   9   5       43.82       49.32      1.76 o 
   3   9   5        7.45        6.27      1.11 o 
   4   9   5        7.30        8.71      1.24 o 
   5   9   5        9.45       10.58      2.09 o 
   6   9   5        5.38        4.94      2.07 o 
   7   9   5        6.09        4.18      1.54 o 
   8   9   5        0.06       -0.56      2.02 o 
   9   9   5        0.01       -3.18      2.12 o 
  -6  10   5        2.49        1.03      2.42 o 
  -5  10   5       41.79       51.68      3.27 o 
  -4  10   5        7.25        7.68      1.84 o 
  -3  10   5        0.03       -1.67      1.26 o 
  -2  10   5        2.87        2.18      1.40 o 
  -1  10   5       12.45        9.23      1.46 o 
   0  10   5       87.35       85.14      3.25 o 
   1  10   5       32.62       27.60      2.11 o 
   2  10   5        2.90        3.89      1.09 o 
   3  10   5       12.69       12.44      1.97 o 
   4  10   5        8.43        8.73      1.29 o 
   5  10   5        0.01       -1.30      0.99 o 
   6  10   5        6.61        9.51      1.70 o 
   7  10   5        0.39        0.36      1.93 o 
   8  10   5        2.28        2.30      2.24 o 
  -5  11   5        0.12        3.12      1.75 o 
  -4  11   5       17.18       19.47      2.36 o 
  -3  11   5        0.92        0.82      1.55 o 
  -2  11   5        0.01       -1.27      1.44 o 
  -1  11   5        0.26       -1.55      1.25 o 
   0  11   5      119.19      116.58      3.67 o 
   1  11   5        0.70        0.02      1.26 o 
   2  11   5      103.34      117.02      3.54 o 
   3  11   5        2.20        3.48      1.11 o 
   4  11   5        1.23        3.44      0.99 o 
   5  11   5        3.85        2.98      1.68 o 
   6  11   5        1.16        0.45      2.46 o 
   7  11   5        0.04       -0.25      2.01 o 
   8  11   5        0.94       -0.53      2.24 o 
  -4  12   5       18.15       16.38      2.36 o 
  -3  12   5        0.60        1.50      1.75 o 
  -2  12   5        3.99        1.88      1.52 o 
  -1  12   5        1.26       -2.09      2.84 o 
   0  12   5        0.00       -1.10      1.43 o 
   1  12   5        0.98        3.85      1.54 o 
   2  12   5       91.17      109.99      3.64 o 
   3  12   5       27.32       36.12      2.70 o 
   4  12   5        6.88        8.47      1.59 o 
   5  12   5        1.58        0.70      1.22 o 
   6  12   5        3.96        6.25      3.18 o 
   7  12   5        0.62        4.74      2.18 o 
  -3  13   5        6.51       11.79      2.20 o 
  -2  13   5        1.28       -1.09      1.19 o 
  -1  13   5       11.31        8.44      1.93 o 
   0  13   5       37.48       38.65      4.22 o 
   1  13   5        4.93        5.81      1.78 o 
   2  13   5      164.63      179.32      4.62 o 
   3  13   5        0.17       -1.43      1.46 o 
   4  13   5       21.22       16.84      2.03 o 
   5  13   5        1.14        1.04      1.74 o 
   6  13   5        5.55        6.68      2.34 o 
  -2  14   5        1.07       -2.40      1.60 o 
  -1  14   5        0.66        2.11      1.81 o 
   0  14   5        1.35        3.10      1.65 o 
   1  14   5        3.43        3.03      1.71 o 
   2  14   5        1.11        5.70      2.08 o 
   3  14   5        2.78        1.62      1.83 o 
   4  14   5        2.90        4.67      1.86 o 
   5  14   5       11.96       12.73      8.68 o 
   0  15   5        0.33       -1.20      2.51 o 
   1  15   5       47.17       53.83      4.63 o 
   2  15   5       42.22       53.54      3.89 o 
   3  15   5        0.71       -2.54      1.69 o 
   4  15   5       37.16       37.68      3.82 o 
  -2 -13   6        3.52        3.31      2.02 o 
  -1 -13   6        0.32        3.94      2.16 o 
   0 -13   6        0.16       -0.53      1.84 o 
  -4 -12   6        9.02        9.58      2.17 o 
  -3 -12   6       11.58       11.75      2.40 o 
  -2 -12   6        3.12        5.91      2.11 o 
  -1 -12   6        1.01        0.81      1.87 o 
   0 -12   6        2.25        4.33      2.15 o 
   1 -12   6       20.58       19.44      2.88 o 
   2 -12   6        0.64       -1.06      2.03 o 
  -6 -11   6        2.07        0.40      2.28 o 
  -5 -11   6        1.15       -0.62      1.83 o 
  -4 -11   6        0.80        0.11      3.46 o 
  -3 -11   6      102.63       98.06      3.48 o 
  -2 -11   6        1.64       -2.38      1.69 o 
  -1 -11   6        1.53        1.00      1.74 o 
   0 -11   6       84.77       78.41      6.87 o 
   1 -11   6        2.61        1.24      1.80 o 
   2 -11   6       50.87       46.86      3.80 o 
   3 -11   6        0.10       -1.07      6.74 o 
   4 -11   6        8.43        4.20      2.41 o 
  -6 -10   6        0.71       -2.20      2.85 o 
  -5 -10   6        0.02       -0.37      2.35 o 
  -4 -10   6        1.65        1.18      1.84 o 
  -3 -10   6        0.09        0.60      1.43 o 
  -2 -10   6       92.87       84.67      3.75 o 
  -1 -10   6        1.59       -1.69      1.33 o 
   0 -10   6        1.86        3.08      2.27 o 
   1 -10   6        2.59       -0.34      2.14 o 
   2 -10   6        0.16        1.63      1.92 o 
   3 -10   6        0.06        0.97      1.80 o 
   4 -10   6        1.53        0.70      2.00 o 
   5 -10   6       49.15       58.40      4.06 o 
  -7  -9   6        2.79        0.39      2.40 o 
  -6  -9   6       21.64       22.24      3.33 o 
  -5  -9   6       73.23       80.78      4.87 o 
  -4  -9   6       44.48       46.60      3.19 o 
  -3  -9   6        2.56        1.91      1.57 o 
  -2  -9   6        4.95        9.27      1.57 o 
  -1  -9   6        0.25        0.90      1.42 o 
   0  -9   6       13.59       10.07      1.78 o 
   1  -9   6        2.35        2.41      1.73 o 
   2  -9   6       78.21       86.63      4.19 o 
   3  -9   6       22.31       23.69      2.95 o 
   4  -9   6        5.57        5.70      2.16 o 
   5  -9   6        3.74        5.49      1.86 o 
   6  -9   6        0.13       -0.78      2.71 o 
  -7  -8   6       63.34       60.96      4.76 o 
  -6  -8   6       11.42       10.67      4.28 o 
  -5  -8   6      158.80      168.13      4.53 o 
  -4  -8   6      106.04      106.42      3.73 o 
  -3  -8   6      738.34      747.90      9.42 o 
  -2  -8   6      683.79      659.90      8.62 o 
  -1  -8   6        1.94        1.66      1.45 o 
   0  -8   6       50.31       63.01      5.17 o 
   1  -8   6        3.55        0.15      1.30 o 
   2  -8   6       45.90       35.97      2.44 o 
   3  -8   6        6.82        6.31      1.61 o 
   4  -8   6       18.47       22.58      2.26 o 
   5  -8   6        2.83        3.19      1.66 o 
   6  -8   6        0.23        1.23      2.60 o 
  -8  -7   6       28.72       34.74      4.00 o 
  -7  -7   6       10.59       15.66      2.89 o 
  -6  -7   6        0.15        1.25      2.01 o 
  -5  -7   6       47.51       51.33      3.88 o 
  -4  -7   6       25.21       17.87      1.97 o 
  -3  -7   6        1.87        3.11      2.32 o 
  -2  -7   6      477.52      479.94      7.06 o 
  -1  -7   6      189.98      188.50      4.44 o 
   0  -7   6        0.85       -0.97      1.37 o 
   1  -7   6       45.50       39.40      2.87 o 
   2  -7   6        0.25        0.59      1.38 o 
   3  -7   6        8.17       14.64      2.58 o 
   4  -7   6        2.40        0.51      1.35 o 
   5  -7   6        1.72       -0.15      1.38 o 
   6  -7   6        4.11        2.96      2.47 o 
   7  -7   6        4.09        9.72      3.21 o 
  -8  -6   6       28.88       30.76      3.89 o 
  -7  -6   6      149.71      156.68      6.09 o 
  -6  -6   6        0.02       -0.63      1.84 o 
  -5  -6   6       73.30       68.44      4.24 o 
  -4  -6   6        0.09        1.34      1.31 o 
  -3  -6   6     1889.21     1795.84     15.58 o 
  -2  -6   6      199.82      196.35      4.36 o 
  -1  -6   6       89.13       96.08      3.28 o 
   0  -6   6       33.94       30.23      2.21 o 
   1  -6   6        2.94        1.01      0.98 o 
   2  -6   6        1.93        5.24      1.33 o 
   3  -6   6        7.73        7.96      1.33 o 
   4  -6   6        0.00        0.46      1.03 o 
   5  -6   6        0.23       -0.67      1.25 o 
   6  -6   6        0.37       -2.12      2.10 o 
   7  -6   6        7.32        8.81      3.02 o 
  -8  -5   6       21.47       26.13      3.55 o 
  -7  -5   6        2.85        0.11      2.15 o 
  -6  -5   6       37.50       34.41      3.30 o 
  -5  -5   6        5.85        7.37      1.47 o 
  -4  -5   6       49.10       44.60      2.52 o 
  -3  -5   6       81.68       70.28      2.93 o 
  -2  -5   6      140.65      164.96      3.87 o 
  -1  -5   6        2.52        4.33      1.26 o 
   0  -5   6       40.27       50.51      1.80 o 
   1  -5   6       53.65       55.99      3.14 o 
   2  -5   6        2.72        3.91      1.09 o 
   3  -5   6       95.68       88.26      3.91 o 
   4  -5   6        0.15       -1.11      1.06 o 
   5  -5   6        0.08        0.32      1.07 o 
   6  -5   6        3.21        4.03      2.32 o 
   7  -5   6        0.88        0.87      2.43 o 
   8  -5   6        4.03        2.75      2.88 o 
  -9  -4   6        0.05        0.83      2.49 o 
  -8  -4   6       25.66       24.31      3.36 o 
  -7  -4   6       15.51       18.08      2.92 o 
  -6  -4   6        5.61        2.17      1.86 o 
  -5  -4   6        0.25        0.46      1.28 o 
  -4  -4   6        1.81        2.51      1.30 o 
  -3  -4   6        1.37        1.15      1.06 o 
  -2  -4   6        1.35        1.88      1.05 o 
  -1  -4   6     1376.36     1427.59     12.28 o 
   0  -4   6       22.51       21.58      1.66 o 
   1  -4   6       41.47       30.36      1.45 o 
   2  -4   6       58.63       51.84      1.98 o 
   3  -4   6      139.73      142.70      3.06 o 
   4  -4   6       20.64       20.71      1.99 o 
   5  -4   6        0.03        0.78      1.09 o 
   6  -4   6        0.01        0.54      1.96 o 
   7  -4   6       23.24       25.52      3.39 o 
   8  -4   6        1.25        5.92      2.93 o 
  -9  -3   6        0.51        4.58      2.54 o 
  -8  -3   6        3.67        2.01      2.23 o 
  -7  -3   6       15.19       17.45      2.77 o 
  -6  -3   6       50.78       52.88      3.64 o 
  -5  -3   6       18.76       25.38      2.03 o 
  -4  -3   6      206.38      211.27      3.27 o 
  -3  -3   6       11.26       14.41      0.92 o 
  -2  -3   6      428.66      440.64      5.62 o 
  -1  -3   6       67.73       65.63      2.45 o 
   0  -3   6       15.24       10.97      0.96 o 
   1  -3   6       79.75       91.59      2.07 o 
   2  -3   6        2.05        2.23      0.87 o 
   3  -3   6       25.74       24.52      1.45 o 
   4  -3   6       18.01       15.45      1.80 o 
   5  -3   6        5.57        7.26      1.72 o 
   6  -3   6        0.03       -1.69      1.39 o 
   7  -3   6       81.90       73.02      4.17 o 
   8  -3   6        0.03        0.28      2.04 o 
   9  -3   6       12.53       20.45      3.65 o 
  -9  -2   6        3.72        4.32      2.58 o 
  -8  -2   6        0.02       -0.92      5.70 o 
  -7  -2   6        1.48        0.41      2.18 o 
  -6  -2   6       32.73       32.29      2.41 o 
  -5  -2   6       77.08       76.64      2.55 o 
  -4  -2   6       38.15       36.21      1.69 o 
  -3  -2   6        0.03        0.28      0.68 o 
  -2  -2   6      436.04      502.36      4.51 o 
  -1  -2   6      223.22      181.69      2.38 o 
   0  -2   6        9.94       10.66      0.77 o 
   1  -2   6      277.05      335.99      4.28 o 
   2  -2   6       14.41       20.76      1.22 o 
   4  -2   6       49.66       47.42      1.95 o 
   5  -2   6      161.38      158.91      3.19 o 
   6  -2   6       52.76       47.49      2.77 o 
   7  -2   6        2.82        2.65      1.69 o 
   8  -2   6        9.21        9.90      2.21 o 
   9  -2   6        0.01        0.27      1.89 o 
  -9  -1   6        7.34       11.57      3.24 o 
  -8  -1   6       36.48       31.89      3.54 o 
  -7  -1   6        0.86       -1.85      1.56 o 
  -6  -1   6       72.40       80.87      3.32 o 
  -5  -1   6      766.78      747.38      7.08 o 
  -4  -1   6        1.57        1.74      0.93 o 
  -3  -1   6      109.54      129.16      2.50 o 
  -2  -1   6       16.38       16.42      0.98 o 
  -1  -1   6     4769.51     5156.24     28.56 o 
   0  -1   6      849.87      782.83      6.92 o 
   1  -1   6      102.25      105.27      3.76 o 
   2  -1   6      420.57      363.54      3.97 o 
   3  -1   6        0.84        1.06      0.78 o 
   4  -1   6     1537.93     1571.95     11.11 o 
   5  -1   6        9.82       10.76      2.08 o 
   6  -1   6        4.56        5.30      1.57 o 
   7  -1   6        0.28        1.04      1.49 o 
   8  -1   6        0.13        3.19      1.78 o 
   9  -1   6       43.24       47.69      3.49 o 
  -9   0   6        1.83       -0.31      2.49 o 
  -8   0   6       12.07       13.01      2.19 o 
  -7   0   6        4.45        4.63      1.82 o 
  -6   0   6     1216.48     1227.97     12.47 o 
  -5   0   6        2.20        1.38      1.30 o 
  -4   0   6      266.01      262.25      3.81 o 
  -3   0   6        3.81        3.75      0.87 o 
  -2   0   6     1149.45     1250.36      8.79 o 
  -1   0   6       87.25       82.94      1.82 o 
   0   0   6      475.79      463.01      5.21 o 
   2   0   6        4.24        2.63      0.68 o 
   3   0   6      608.17      560.17      5.16 o 
   4   0   6        4.29        4.32      1.00 o 
   5   0   6       90.46       87.62      2.39 o 
   6   0   6        3.59        2.20      1.42 o 
   7   0   6        1.65        0.56      1.42 o 
   8   0   6        0.06        0.63      1.64 o 
   9   0   6       28.01       35.15      3.06 o 
  -9   1   6       11.42       11.39      2.47 o 
  -8   1   6       11.84        8.29      3.36 o 
  -7   1   6        3.78        5.99      1.92 o 
  -6   1   6      963.35      952.89     13.94 o 
  -5   1   6      718.07      694.46      6.93 o 
  -4   1   6       11.08       12.48      1.44 o 
  -3   1   6      205.94      251.85      3.50 o 
  -2   1   6        0.12        0.65      0.68 o 
  -1   1   6     3764.31     4353.84     24.44 o 
   0   1   6       10.87       12.82      0.75 o 
   1   1   6      578.90      586.26      4.67 o 
   2   1   6       58.85       66.95      2.01 o 
   3   1   6      208.80      213.78      2.87 o 
   4   1   6     1845.28     1811.84     12.00 o 
   5   1   6        6.76        4.25      1.28 o 
   6   1   6        2.21        1.47      1.30 o 
   7   1   6       17.18       16.19      1.92 o 
   8   1   6        1.82        2.25      1.62 o 
   9   1   6       14.42       15.10      2.34 o 
  -8   2   6       12.13       11.39      2.18 o 
  -7   2   6      164.22      163.31      4.78 o 
  -6   2   6      450.19      455.47      9.61 o 
  -5   2   6        0.32        0.89      1.15 o 
  -4   2   6      161.30      178.67      3.34 o 
  -3   2   6       17.87       17.97      1.30 o 
  -1   2   6       46.36       43.66      1.48 o 
   0   2   6      821.91      844.11      7.24 o 
   1   2   6      158.86      163.35      2.96 o 
   2   2   6      146.78      145.02      6.80 o 
   3   2   6       10.42       11.73      1.22 o 
   4   2   6       70.98       68.41      2.28 o 
   5   2   6       17.39       17.41      1.31 o 
   6   2   6       43.52       43.71      2.44 o 
   7   2   6        2.28        3.55      1.44 o 
   8   2   6       11.24        9.46      1.86 o 
   9   2   6        0.21       -2.35      1.57 o 
  -8   3   6       24.42       29.75      3.39 o 
  -7   3   6        4.54        5.53      2.29 o 
  -6   3   6       95.81       94.84      3.63 o 
  -5   3   6       26.01       25.32      1.80 o 
  -4   3   6       55.67       70.17      2.49 o 
  -3   3   6        8.19        9.10      1.71 o 
  -2   3   6       42.97       38.78      1.60 o 
  -1   3   6      724.61      705.45      5.80 o 
   0   3   6        9.23       11.75      0.77 o 
   1   3   6      285.91      275.94      3.94 o 
   2   3   6        0.02       -0.12      0.65 o 
   3   3   6       66.27       71.77      3.64 o 
   4   3   6       10.96        6.29      0.89 o 
   5   3   6       55.93       60.50      2.03 o 
   6   3   6       65.79       71.23      2.89 o 
   7   3   6       11.64       11.05      1.69 o 
   8   3   6        1.14        0.69      1.55 o 
   9   3   6        1.93        1.55      1.81 o 
  -8   4   6        7.23        5.02      2.66 o 
  -7   4   6       55.63       51.10      4.03 o 
  -6   4   6        0.87        0.09      1.83 o 
  -5   4   6      140.20      128.31      3.29 o 
  -4   4   6        0.04        0.53      1.10 o 
  -3   4   6        1.74        0.03      0.90 o 
  -2   4   6      100.88       83.94      2.15 o 
  -1   4   6       25.64       29.00      1.33 o 
   0   4   6        1.33        0.17      0.57 o 
   1   4   6        0.98        2.06      0.77 o 
   2   4   6       15.80       11.65      1.14 o 
   3   4   6        0.46        0.00      0.55 o 
   4   4   6       25.50       22.56      1.26 o 
   5   4   6        5.38        5.83      1.02 o 
   6   4   6      395.42      369.11      5.79 o 
   7   4   6        0.04        0.96      1.36 o 
   8   4   6        1.41       -0.41      1.54 o 
   9   4   6        3.57        3.01      1.81 o 
  -8   5   6        0.53        2.86      3.30 o 
  -7   5   6        4.47        5.60      2.34 o 
  -6   5   6       95.48       87.17      4.65 o 
  -5   5   6        0.02       -0.64      1.25 o 
  -3   5   6        0.42        0.78      0.99 o 
  -2   5   6       94.98      108.60      4.32 o 
  -1   5   6        1.67        0.10      0.73 o 
   0   5   6      170.63      187.28      5.38 o 
   1   5   6       67.34       61.58      1.62 o 
   2   5   6      111.40      122.09      2.05 o 
   3   5   6       60.07       58.81      1.66 o 
   4   5   6       25.91       21.78      1.29 o 
   5   5   6       83.65       84.52      3.87 o 
   6   5   6      227.86      222.76      4.61 o 
   7   5   6       86.22       89.21      3.35 o 
   8   5   6        8.50        7.12      1.78 o 
   9   5   6        0.10       -2.85      1.90 o 
  -7   6   6        4.62        9.10      2.58 o 
  -6   6   6       38.77       38.60      3.62 o 
  -5   6   6       12.21       10.29      2.49 o 
  -4   6   6       39.80       32.90      2.29 o 
  -3   6   6        0.73        2.11      1.25 o 
  -2   6   6        2.23        3.73      1.05 o 
  -1   6   6      207.33      180.26      3.04 o 
   0   6   6        0.26       -0.34      0.74 o 
   1   6   6      173.39      186.23      2.83 o 
   2   6   6      245.62      235.84      3.14 o 
   3   6   6        6.19        6.62      0.88 o 
   4   6   6        8.88       12.93      1.14 o 
   5   6   6       23.21       20.36      1.46 o 
   6   6   6     1409.24     1349.90     12.70 o 
   7   6   6        1.74        1.58      1.37 o 
   8   6   6        0.00       -2.10      3.05 o 
   9   6   6        1.58       -1.58      2.05 o 
  -7   7   6        0.02        0.66      2.34 o 
  -6   7   6        0.14        1.63      2.19 o 
  -5   7   6       19.03       22.31      2.15 o 
  -4   7   6      458.33      408.30      6.56 o 
  -3   7   6        0.12       -0.28      1.31 o 
  -1   7   6       18.77       19.30      1.36 o 
   0   7   6       97.73       95.65      2.34 o 
   1   7   6        3.37        1.46      0.88 o 
   2   7   6       44.69       42.12      2.15 o 
   3   7   6       65.20       79.53      1.88 o 
   4   7   6       51.49       54.38      2.21 o 
   5   7   6      281.51      276.42      4.07 o 
   6   7   6       27.55       23.46      2.17 o 
   7   7   6       30.78       27.44      2.99 o 
   8   7   6        2.18        2.14      2.10 o 
   9   7   6        0.00       -1.23      2.29 o 
  -7   8   6        0.27        2.64      2.72 o 
  -6   8   6        0.14        0.08      2.05 o 
  -5   8   6        1.67        0.48      1.49 o 
  -4   8   6       77.88       67.67      4.06 o 
  -3   8   6      127.45      123.14      3.73 o 
  -2   8   6       83.74       79.81      3.32 o 
  -1   8   6        3.78        1.85      1.29 o 
   0   8   6        5.49        5.56      1.16 o 
   1   8   6     1035.78     1055.88     11.41 o 
   2   8   6       41.63       46.51      1.90 o 
   3   8   6        7.30        9.33      1.16 o 
   4   8   6        6.95        7.43      1.14 o 
   5   8   6      313.81      306.58      4.42 o 
   6   8   6      235.13      230.81      6.27 o 
   7   8   6        2.60        3.48      1.99 o 
   8   8   6        0.28        0.23      3.18 o 
   9   8   6        1.79       -3.69      2.46 o 
  -6   9   6        0.28        1.74      2.29 o 
  -5   9   6      216.35      202.75      5.20 o 
  -4   9   6       20.57       15.48      2.37 o 
  -3   9   6       30.95       30.51      2.42 o 
  -2   9   6       13.07       14.00      1.88 o 
  -1   9   6       14.32       14.84      1.94 o 
   0   9   6      233.68      245.84      4.71 o 
   1   9   6       17.41       15.77      1.37 o 
   2   9   6        0.21       -0.18      0.93 o 
   3   9   6       17.91       15.62      1.37 o 
   4   9   6        0.39       -1.31      0.92 o 
   5   9   6       49.51       51.58      3.82 o 
   6   9   6        4.10        5.96      4.08 o 
   7   9   6        0.14       -0.72      1.87 o 
   8   9   6        5.96        3.70      2.36 o 
   9   9   6        0.02       -1.31      2.29 o 
  -5  10   6        1.35       -0.06      1.60 o 
  -4  10   6       31.18       37.75      3.02 o 
  -3  10   6        1.00        1.13      1.39 o 
  -2  10   6       56.35       50.96      2.93 o 
  -1  10   6       23.62       18.18      1.96 o 
   0  10   6       15.43       17.89      1.89 o 
   1  10   6       55.35       49.05      2.64 o 
   2  10   6        7.25        7.50      1.21 o 
   3  10   6        0.05        0.23      1.40 o 
   4  10   6        0.37        1.33      0.99 o 
   5  10   6        7.32        8.27      2.08 o 
   6  10   6        0.15        0.94      3.63 o 
   7  10   6        6.89        5.83      2.20 o 
   8  10   6        8.92        7.09      2.64 o 
  -5  11   6        6.55       10.28      2.05 o 
  -4  11   6        2.83        2.39      1.74 o 
  -3  11   6      118.06      103.76      4.07 o 
  -2  11   6        3.79        3.60      1.53 o 
  -1  11   6        1.61       -0.68      1.72 o 
   0  11   6        1.29        0.26      1.28 o 
   1  11   6       13.95        9.24      1.64 o 
   2  11   6        0.36       -0.54      1.20 o 
   3  11   6        0.17       -0.46      1.01 o 
   4  11   6        0.07        0.78      1.28 o 
   5  11   6        0.00       -0.96      1.22 o 
   6  11   6        4.01        6.83      2.05 o 
   7  11   6        1.02        1.47      2.10 o 
   8  11   6        7.22       14.38      2.74 o 
  -4  12   6        2.41        0.02      1.71 o 
  -3  12   6        9.37        9.56      2.03 o 
  -2  12   6       26.47       26.31      2.55 o 
  -1  12   6        7.12        8.64      1.93 o 
   0  12   6        2.24        0.81      1.49 o 
   1  12   6       12.69       15.51      2.95 o 
   2  12   6       33.45       39.19      2.62 o 
   3  12   6       12.35       15.41      2.34 o 
   4  12   6        8.21       11.24      3.37 o 
   5  12   6        0.05       -0.91      1.36 o 
   6  12   6        0.45        0.28      2.07 o 
   7  12   6        8.96       10.02      4.80 o 
  -3  13   6        2.98        3.92      1.93 o 
  -2  13   6        6.60        5.44      3.33 o 
  -1  13   6        2.79        3.90      1.95 o 
   0  13   6        0.28        0.36      1.84 o 
   1  13   6        0.74        2.76      1.55 o 
   2  13   6        9.86       13.40      4.08 o 
   3  13   6       53.22       62.61      4.92 o 
   4  13   6        8.17       11.64      5.05 o 
   5  13   6        1.31        1.60      1.86 o 
   6  13   6        1.55        0.79      2.08 o 
  -1  14   6        0.18        0.05      1.59 o 
   0  14   6        1.66        4.52      1.92 o 
   1  14   6        2.68        8.17      2.15 o 
   2  14   6      138.16      162.77     10.56 o 
   3  14   6        5.85       13.31      2.47 o 
   4  14   6        7.09       11.83      2.43 o 
   5  14   6        2.00        0.34      1.97 o 
   1  15   6        0.22        2.06      1.92 o 
   2  15   6        0.95        3.87      2.10 o 
   3  15   6       97.47      120.30     15.55 o 
  -3 -12   7       12.07       18.39      3.11 o 
  -2 -12   7        1.36       -0.25      2.20 o 
  -1 -12   7        0.93       -2.03      1.73 o 
   0 -12   7        0.44        1.67      2.01 o 
   1 -12   7        1.14       -1.62      1.96 o 
  -5 -11   7        0.10       -0.07      1.70 o 
  -4 -11   7       16.04       18.41      2.38 o 
  -3 -11   7       21.92       26.37      2.71 o 
  -2 -11   7        2.05        1.06      1.67 o 
  -1 -11   7        5.45        8.89      3.63 o 
   0 -11   7        1.80        1.23      2.40 o 
   1 -11   7        0.16        0.91      1.73 o 
   2 -11   7        0.40        0.70      1.88 o 
   3 -11   7        1.36        2.10      2.85 o 
  -6 -10   7        2.14        3.28      2.57 o 
  -5 -10   7       11.26       12.10      2.12 o 
  -4 -10   7        8.56       13.36      2.11 o 
  -3 -10   7        1.53        1.44      1.64 o 
  -2 -10   7       16.69       15.48      2.15 o 
  -1 -10   7        2.76        3.10      1.67 o 
   0 -10   7        8.44       12.16      2.33 o 
   1 -10   7       32.73       24.97      2.92 o 
   2 -10   7        2.88       -0.01      1.84 o 
   3 -10   7        5.16        3.08      2.06 o 
   4 -10   7       29.45       37.89      3.61 o 
  -6  -9   7        3.78        1.79      2.28 o 
  -5  -9   7        2.75        3.59      1.66 o 
  -4  -9   7       81.70       75.52      3.53 o 
  -3  -9   7        6.57        4.74      1.76 o 
  -2  -9   7        0.72       -0.43      2.06 o 
  -1  -9   7       12.65       16.17      2.38 o 
   0  -9   7       13.30       10.16      1.82 o 
   1  -9   7        1.54       -0.13      1.70 o 
   2  -9   7        4.33        1.93      1.88 o 
   3  -9   7        7.78        5.85      3.24 o 
   4  -9   7        2.27        5.83      2.20 o 
   5  -9   7       11.69       14.42      5.57 o 
  -7  -8   7        1.07       -1.03      4.86 o 
  -6  -8   7        0.78        0.93      2.06 o 
  -5  -8   7       10.18       14.23      2.10 o 
  -4  -8   7       96.80      100.57      6.63 o 
  -3  -8   7      167.82      172.36      4.68 o 
  -2  -8   7       41.50       40.72      2.82 o 
  -1  -8   7      528.07      522.28      7.85 o 
   0  -8   7        0.53        0.42      1.70 o 
   2  -8   7        0.22        1.42      1.40 o 
   3  -8   7      132.06      138.47      5.44 o 
   4  -8   7       56.71       54.24      3.79 o 
   5  -8   7        2.85        0.07      1.58 o 
   6  -8   7        0.10       -0.54      2.60 o 
  -7  -7   7       15.19       12.78      2.76 o 
  -6  -7   7        5.68        2.29      2.27 o 
  -5  -7   7        3.46        2.89      1.51 o 
  -4  -7   7       50.92       51.89      3.04 o 
  -3  -7   7       52.73       58.81      3.04 o 
  -2  -7   7     2173.27     2232.36     23.17 o 
  -1  -7   7       50.36       48.22      4.67 o 
   0  -7   7       29.69       26.83      2.36 o 
   1  -7   7        0.05       -2.00      1.33 o 
   2  -7   7       17.65       19.48      2.01 o 
   3  -7   7       27.93       20.38      2.04 o 
   4  -7   7       15.24       17.13      2.72 o 
   5  -7   7       26.57       30.41      2.51 o 
   6  -7   7        2.73        0.89      2.60 o 
  -8  -6   7        3.42        1.02      2.66 o 
  -7  -6   7        1.77        1.06      2.16 o 
  -6  -6   7        5.47        6.23      2.42 o 
  -5  -6   7        4.58        3.02      1.45 o 
  -4  -6   7      169.81      181.76     12.57 o 
  -3  -6   7       80.71       84.71      3.42 o 
  -2  -6   7        0.94        3.78      1.62 o 
  -1  -6   7      992.24      901.95      9.97 o 
   0  -6   7       88.88       94.30      3.45 o 
   1  -6   7       11.37        9.87      1.75 o 
   2  -6   7        3.25        0.74      1.13 o 
   3  -6   7      104.27       94.40      2.95 o 
   4  -6   7        0.81       -0.42      1.19 o 
   5  -6   7       59.50       59.49      2.96 o 
   6  -6   7        5.91        2.16      4.80 o 
   7  -6   7        3.71        5.83      3.02 o 
  -8  -5   7        3.59        5.37      2.55 o 
  -7  -5   7       75.82       71.30      4.67 o 
  -6  -5   7       90.35       86.04      4.76 o 
  -5  -5   7       55.22       55.20      2.86 o 
  -4  -5   7        4.48        8.46      1.56 o 
  -3  -5   7      524.93      559.58      7.48 o 
  -2  -5   7      572.11      539.43      7.21 o 
  -1  -5   7      623.65      611.24      7.65 o 
   0  -5   7      112.22      117.17      3.53 o 
   1  -5   7       13.01        9.99      1.42 o 
   2  -5   7        4.13        4.06      1.22 o 
   3  -5   7        0.34        1.31      1.18 o 
   4  -5   7        0.08       -1.03      1.07 o 
   5  -5   7        0.86        0.82      1.16 o 
   6  -5   7        4.10        1.90      2.79 o 
   7  -5   7        0.99        0.87      2.56 o 
  -8  -4   7        0.00        1.70      2.59 o 
  -7  -4   7      142.25      169.13      6.31 o 
  -6  -4   7       14.23       16.54      2.79 o 
  -5  -4   7       14.25       10.87      1.67 o 
  -4  -4   7       78.78       72.15      3.02 o 
  -3  -4   7       16.48       15.29      1.96 o 
  -2  -4   7       28.82       32.37      2.18 o 
  -1  -4   7        2.78        3.91      1.27 o 
   0  -4   7       23.16       22.43      1.24 o 
   2  -4   7       46.17       39.03      1.86 o 
   3  -4   7       44.01       40.15      1.98 o 
   4  -4   7       45.94       47.52      3.33 o 
   5  -4   7       18.96       20.76      1.66 o 
   6  -4   7        0.19       -2.23      2.02 o 
   7  -4   7        2.87        1.56      1.76 o 
   8  -4   7        4.54        0.45      2.67 o 
  -8  -3   7        1.11        2.15      2.30 o 
  -7  -3   7       40.93       42.53      4.47 o 
  -6  -3   7       29.66       29.84      3.21 o 
  -5  -3   7        5.25        4.03      1.43 o 
  -4  -3   7        1.98        3.01      1.42 o 
  -3  -3   7       87.35       92.33      3.07 o 
  -2  -3   7        0.35        1.72      1.10 o 
  -1  -3   7      117.59      140.17      2.10 o 
   0  -3   7       37.44       36.58      1.36 o 
   1  -3   7      200.36      179.44      2.89 o 
   2  -3   7        1.89        5.05      1.01 o 
   3  -3   7        9.04       10.19      1.26 o 
   4  -3   7      111.93      113.15      2.94 o 
   5  -3   7       11.71        7.02      1.32 o 
   6  -3   7        4.08        1.23      1.56 o 
   7  -3   7        0.18        1.22      1.71 o 
   8  -3   7       39.50       45.07      3.58 o 
  -8  -2   7        0.80       -0.57      2.25 o 
  -7  -2   7       65.62       86.05      5.83 o 
  -6  -2   7        1.55       -1.62      1.84 o 
  -5  -2   7       44.52       48.78      2.70 o 
  -4  -2   7        4.86        9.06      1.15 o 
  -3  -2   7       73.48       75.07      2.06 o 
  -2  -2   7        2.17        3.02      0.73 o 
  -1  -2   7       65.59       61.91      1.60 o 
   0  -2   7     1333.81     1366.40      9.48 o 
   1  -2   7       70.56       63.67      1.82 o 
   2  -2   7       83.98       97.62      2.30 o 
   3  -2   7        2.45        3.46      0.97 o 
   4  -2   7       30.96       32.58      1.79 o 
   5  -2   7        1.18        1.47      1.11 o 
   6  -2   7       18.52       17.15      2.04 o 
   7  -2   7       33.35       35.05      2.74 o 
   8  -2   7        6.70       10.08      2.16 o 
   9  -2   7        0.13        2.93      2.14 o 
  -8  -1   7       33.23       28.40      3.55 o 
  -7  -1   7       54.02       58.61      7.71 o 
  -6  -1   7       30.97       25.67      2.21 o 
  -5  -1   7        2.53        0.21      1.89 o 
  -4  -1   7       30.42       28.76      1.65 o 
  -3  -1   7       14.55       15.98      1.53 o 
  -2  -1   7        3.65        4.10      0.74 o 
  -1  -1   7      698.74      768.41      6.19 o 
   0  -1   7       21.49       21.06      1.11 o 
   1  -1   7      262.23      244.03      3.20 o 
   2  -1   7       32.29       29.97      1.71 o 
   3  -1   7      391.64      437.14      4.77 o 
   4  -1   7        0.06       -0.07      0.94 o 
   5  -1   7       14.87       20.03      1.91 o 
   6  -1   7      132.98      135.33      3.98 o 
   7  -1   7       10.50        9.25      1.87 o 
   8  -1   7       20.35       20.20      2.48 o 
   9  -1   7        2.73        1.28      3.17 o 
  -8   0   7        0.31        1.13      3.18 o 
  -7   0   7       28.73       24.32      2.49 o 
  -6   0   7        0.91        2.65      1.58 o 
  -5   0   7      830.48      857.75      8.06 o 
  -4   0   7        2.25        2.34      1.10 o 
  -3   0   7      312.60      340.64      4.17 o 
  -2   0   7       45.64       51.10      1.78 o 
  -1   0   7       87.53       93.22      2.02 o 
   0   0   7     3633.82     3747.51     21.58 o 
   1   0   7      141.28      132.70      2.27 o 
   2   0   7      115.65       88.95      1.99 o 
   3   0   7       14.53       15.69      1.19 o 
   4   0   7        5.64        5.87      1.07 o 
   5   0   7       32.07       30.67      1.71 o 
   6   0   7        0.18       -0.12      1.34 o 
   7   0   7        1.46        1.29      1.44 o 
   8   0   7       13.72       10.92      1.98 o 
   9   0   7       33.59       45.65      3.92 o 
  -8   1   7       10.23       10.74      2.14 o 
  -7   1   7       28.84       32.02      4.00 o 
  -6   1   7       14.39       11.84      1.91 o 
  -5   1   7      262.94      273.18      4.59 o 
  -4   1   7      256.14      262.82      4.09 o 
  -3   1   7        1.36        1.76      0.90 o 
  -2   1   7      402.28      394.00      4.29 o 
  -1   1   7      291.23      300.23      3.96 o 
   0   1   7       42.59       51.52      3.24 o 
   1   1   7      482.66      495.89      4.40 o 
   2   1   7        5.05        3.06      0.73 o 
   3   1   7       85.62       91.32      2.12 o 
   4   1   7       18.96       18.32      1.52 o 
   5   1   7      258.40      263.96      3.82 o 
   6   1   7        4.77        3.42      1.45 o 
   7   1   7        2.45        0.02      1.39 o 
   8   1   7        0.82       -0.59      1.72 o 
   9   1   7       23.55       29.52      3.62 o 
  -8   2   7        6.38        2.68      2.29 o 
  -7   2   7        0.54       -1.89      1.64 o 
  -6   2   7       40.32       42.22      2.91 o 
  -5   2   7      948.33      968.80      8.89 o 
  -4   2   7      342.91      332.10      4.65 o 
  -3   2   7      213.79      213.54      3.49 o 
  -2   2   7        9.55       11.69      1.05 o 
  -1   2   7     1815.56     1953.76     12.89 o 
   0   2   7       29.58       38.54      1.40 o 
   1   2   7        6.77        4.63      0.91 o 
   2   2   7      254.80      266.71      4.68 o 
   3   2   7        8.79        6.02      0.81 o 
   4   2   7       51.78       51.38      1.90 o 
   5   2   7        4.71        3.20      1.02 o 
   6   2   7        0.03       -1.82      1.21 o 
   7   2   7        4.78        6.58      1.84 o 
   8   2   7        0.04       -0.83      1.47 o 
   9   2   7        9.65        8.05      4.47 o 
  -8   3   7        6.25        1.38      2.18 o 
  -7   3   7       30.96       39.12      3.56 o 
  -6   3   7       27.59       29.61      2.61 o 
  -5   3   7     2766.32     2779.55     18.68 o 
  -4   3   7        0.14        0.53      1.13 o 
  -3   3   7       99.28      109.70      2.78 o 
  -2   3   7      104.25      121.02      2.97 o 
  -1   3   7       14.20       14.18      1.06 o 
   0   3   7      173.84      151.20      2.23 o 
   1   3   7       46.68       45.39      1.97 o 
   2   3   7        2.07        0.90      1.04 o 
   3   3   7       40.66       49.38      2.49 o 
   4   3   7       81.75       81.39      2.68 o 
   5   3   7       55.06       48.68      2.62 o 
   6   3   7       15.75       18.11      1.77 o 
   7   3   7       17.97       13.45      1.78 o 
   8   3   7        0.46        3.95      2.11 o 
   9   3   7        2.22        1.30      3.24 o 
  -8   4   7        4.99        5.32      2.55 o 
  -7   4   7       14.71       12.70      3.24 o 
  -6   4   7       45.97       54.73      3.93 o 
  -5   4   7        6.86        6.50      1.44 o 
  -4   4   7        0.06       -0.18      1.20 o 
  -3   4   7       10.31        9.07      1.72 o 
  -2   4   7        9.05       10.32      1.16 o 
  -1   4   7       24.52       22.11      1.26 o 
   0   4   7       30.14       27.84      1.22 o 
   1   4   7        6.73        5.08      1.00 o 
   2   4   7        0.08        0.77      0.82 o 
   3   4   7        5.87        3.44      0.65 o 
   4   4   7        1.24       -0.12      0.76 o 
   5   4   7        2.00        2.47      1.07 o 
   6   4   7        2.90        3.31      1.31 o 
   7   4   7        1.16        2.53      1.83 o 
   8   4   7        7.79       11.62      2.57 o 
   9   4   7        1.41        2.34      3.11 o 
  -7   5   7       18.70       22.05      6.09 o 
  -6   5   7        9.69       12.12      2.55 o 
  -5   5   7       44.88       31.35      5.71 o 
  -4   5   7        2.80        7.28      1.42 o 
  -2   5   7        0.05        0.00      0.91 o 
  -1   5   7      137.48      128.93      2.60 o 
   0   5   7       24.42       22.91      1.24 o 
   1   5   7       53.45       52.37      1.43 o 
   2   5   7        7.74        7.02      1.19 o 
   3   5   7        9.63       11.20      1.37 o 
   4   5   7       20.20       18.45      1.88 o 
   5   5   7       17.47       16.84      2.07 o 
   6   5   7       10.04       10.87      2.18 o 
   7   5   7        0.44       -0.14      1.73 o 
   8   5   7       11.13        6.10      3.05 o 
   9   5   7        2.03        3.05      2.38 o 
  -7   6   7        2.87        3.67      2.38 o 
  -6   6   7       35.50       35.17      3.52 o 
  -5   6   7       28.92       28.01      2.28 o 
  -4   6   7       12.87       17.67      1.92 o 
  -3   6   7        5.85        2.80      1.34 o 
  -2   6   7       67.08       71.75      3.08 o 
  -1   6   7        0.02       -0.23      0.94 o 
   0   6   7       10.53       12.08      1.12 o 
   1   6   7       40.25       37.32      1.59 o 
   2   6   7       25.22       28.47      1.38 o 
   3   6   7        1.29        1.11      0.86 o 
   4   6   7        3.82        2.12      1.12 o 
   5   6   7      191.14      175.12      4.06 o 
   6   6   7        5.69        7.25      2.33 o 
   7   6   7        6.19        7.91      2.14 o 
   8   6   7       27.25       26.35      6.55 o 
   9   6   7        2.75       -2.79      2.08 o 
  -7   7   7        0.33       -0.05      4.21 o 
  -6   7   7        9.61        7.53      2.66 o 
  -5   7   7       29.25       36.95      3.08 o 
  -4   7   7       39.74       28.61      2.42 o 
  -3   7   7      175.60      144.44      3.95 o 
  -2   7   7        3.73        2.17      2.12 o 
  -1   7   7       96.91      106.68      3.05 o 
   0   7   7       35.27       27.82      1.57 o 
   1   7   7        0.60       -0.62      0.86 o 
   2   7   7      129.93      125.29      2.58 o 
   3   7   7       49.08       44.52      2.36 o 
   4   7   7       20.21       16.04      1.81 o 
   5   7   7       64.08       61.36      2.82 o 
   6   7   7      105.70       95.37      4.44 o 
   7   7   7        6.96        8.08      2.18 o 
   8   7   7        2.86        3.36      2.32 o 
   9   7   7        0.00        1.78      2.53 o 
  -6   8   7        0.05        1.08      2.06 o 
  -5   8   7        1.11        3.75      1.66 o 
  -4   8   7       13.53       13.41      1.92 o 
  -3   8   7      251.18      219.31      8.59 o 
  -2   8   7        8.20        7.90      1.58 o 
  -1   8   7       10.57       12.59      1.92 o 
   0   8   7      150.40      151.48      4.30 o 
   1   8   7        2.80        3.10      1.03 o 
   2   8   7      284.50      285.90      4.01 o 
   3   8   7       46.59       38.67      2.26 o 
   4   8   7       36.34       35.16      3.15 o 
   5   8   7        0.87        3.44      1.32 o 
   6   8   7        0.06        6.47      3.30 o 
   7   8   7       35.74       36.67      3.34 o 
   8   8   7        1.66       -0.06      2.27 o 
   9   8   7       11.08       10.54      4.67 o 
  -6   9   7        9.36        8.16      2.92 o 
  -5   9   7        3.01        1.11      1.55 o 
  -4   9   7        6.35        5.26      1.73 o 
  -3   9   7       10.36        7.77      1.77 o 
  -2   9   7      111.60      107.50      4.08 o 
  -1   9   7       91.55       85.08      3.24 o 
   0   9   7        2.31        5.84      1.43 o 
   1   9   7        3.94        6.29      1.19 o 
   2   9   7       11.66       10.48      1.68 o 
   3   9   7        9.55        6.06      1.43 o 
   4   9   7        3.63        2.37      1.27 o 
   5   9   7        3.96        6.78      1.55 o 
   6   9   7       44.77       49.46      3.70 o 
   7   9   7        2.59        5.32      2.18 o 
   8   9   7        0.53        1.18      2.53 o 
  -5  10   7        0.26        2.96      1.98 o 
  -4  10   7        2.89        6.28      2.73 o 
  -3  10   7      141.44      118.65      4.08 o 
  -2  10   7        9.03        9.28      1.74 o 
  -1  10   7        3.40        2.45      1.41 o 
   0  10   7       21.12       16.40      2.58 o 
   1  10   7       32.64       34.60      4.73 o 
   2  10   7      107.98       84.68      3.03 o 
   3  10   7       26.74       30.17      2.22 o 
   4  10   7       19.22       22.22      2.77 o 
   5  10   7       18.11       17.51      1.90 o 
   6  10   7        1.13        0.94      2.92 o 
   7  10   7       15.00       11.30      2.92 o 
   8  10   7        0.52        1.01      2.23 o 
  -4  11   7        5.73        2.23      1.75 o 
  -3  11   7       15.37       13.07      2.15 o 
  -2  11   7       20.60       18.92      2.21 o 
  -1  11   7        0.01       -0.94      1.40 o 
   0  11   7       44.69       42.38      2.69 o 
   1  11   7       16.75       14.89      2.15 o 
   2  11   7        5.49        4.73      1.65 o 
   3  11   7        1.72        2.35      1.25 o 
   4  11   7       13.77       16.63      2.34 o 
   5  11   7        2.71        2.40      1.44 o 
   6  11   7        1.30        0.55      1.92 o 
   7  11   7        8.78        9.10      2.52 o 
  -4  12   7        2.61        0.03      1.68 o 
  -3  12   7       22.74       27.71      4.10 o 
  -2  12   7        2.01        0.77      1.60 o 
  -1  12   7        0.01        0.36      1.55 o 
   0  12   7        3.85        3.89      1.74 o 
   1  12   7        9.77        6.87      1.92 o 
   2  12   7       38.70       39.34      3.24 o 
   3  12   7        7.52        5.58      1.97 o 
   4  12   7        1.50        2.31      2.79 o 
   5  12   7        0.96        0.58      1.44 o 
   6  12   7        1.88        1.39      2.08 o 
   7  12   7        1.67        1.17      6.09 o 
  -2  13   7        5.09       10.65      2.43 o 
  -1  13   7        0.36        0.84      1.83 o 
   0  13   7        0.28       -0.38      2.20 o 
   1  13   7        0.01        0.09      1.64 o 
   2  13   7       12.41       13.38      2.42 o 
   3  13   7        0.06        1.04      1.74 o 
   4  13   7       24.14       31.38      6.61 o 
   5  13   7        1.63        2.73      2.01 o 
   6  13   7        0.22        0.62      2.02 o 
  -1  14   7        0.01        2.64      1.96 o 
   0  14   7        1.24        0.73      1.92 o 
   1  14   7        1.45        1.63      1.83 o 
   2  14   7        0.44       -0.78      3.24 o 
   3  14   7        0.00       -0.73      2.07 o 
   4  14   7       24.26       29.77      3.25 o 
   5  14   7        3.10        4.93      2.27 o 
  -4 -11   8        0.73        0.86      1.79 o 
  -3 -11   8       90.13      109.20      4.50 o 
  -2 -11   8       16.09       17.13      2.42 o 
  -1 -11   8        5.58        6.68      2.21 o 
   0 -11   8        7.22        7.17      2.43 o 
   1 -11   8        0.04        2.15      1.94 o 
   2 -11   8        0.07        1.54      2.13 o 
  -5 -10   8        1.40        1.66      1.68 o 
  -4 -10   8        9.70        8.06      2.02 o 
  -3 -10   8        5.68        5.30      1.85 o 
  -2 -10   8       35.32       40.17      3.08 o 
  -1 -10   8        2.90        1.43      1.68 o 
   0 -10   8        3.19        4.22      1.89 o 
   1 -10   8        0.42       -2.51      1.77 o 
   2 -10   8        0.01        1.27      2.01 o 
   3 -10   8       21.88       19.29      3.04 o 
  -6  -9   8        1.88       -0.53      2.79 o 
  -5  -9   8        2.92        2.74      1.69 o 
  -4  -9   8        3.97        4.72      2.67 o 
  -3  -9   8        2.74        2.58      1.93 o 
  -2  -9   8        0.45        1.20      1.60 o 
  -1  -9   8      149.33      161.12      4.80 o 
   0  -9   8        1.76        1.47      1.56 o 
   1  -9   8        8.83       11.91      2.34 o 
   2  -9   8       67.39       60.44      3.99 o 
   3  -9   8        0.22        2.06      2.85 o 
   4  -9   8       48.79       49.02      3.96 o 
  -6  -8   8        2.20       -2.59      3.18 o 
  -5  -8   8        1.66        1.31      1.48 o 
  -4  -8   8        0.31        1.60      1.56 o 
  -3  -8   8        0.06        3.09      1.64 o 
  -2  -8   8        0.85        2.24      1.51 o 
  -1  -8   8        0.64       -0.12      1.51 o 
   0  -8   8      123.52      133.96      5.82 o 
   1  -8   8       17.46       15.25      4.17 o 
   2  -8   8        6.09        4.06      2.58 o 
   3  -8   8        5.42        2.19      1.86 o 
   4  -8   8        0.48        0.23      3.05 o 
   5  -8   8        0.59        3.24      2.02 o 
  -7  -7   8        0.02       -1.29      2.08 o 
  -6  -7   8        4.93        3.04      2.25 o 
  -5  -7   8        0.95        0.81      1.47 o 
  -4  -7   8       31.34       25.71      2.39 o 
  -3  -7   8      230.46      255.09      5.62 o 
  -2  -7   8       58.45       57.06      3.12 o 
  -1  -7   8       53.21       48.70      3.01 o 
   0  -7   8        0.06        4.02      1.63 o 
   1  -7   8        8.69       10.28      1.96 o 
   2  -7   8       38.84       35.31      2.57 o 
   3  -7   8        5.30        2.70      1.59 o 
   4  -7   8       43.46       50.75      3.61 o 
   5  -7   8        8.43        5.41      1.82 o 
   6  -7   8        0.91       -2.60      2.45 o 
  -7  -6   8        0.32        1.00      4.21 o 
  -6  -6   8        0.17       -1.38      1.84 o 
  -5  -6   8      144.03      138.36      4.23 o 
  -4  -6   8       17.46       14.41      3.46 o 
  -3  -6   8      257.38      241.77      5.21 o 
  -2  -6   8      193.10      185.87      5.20 o 
  -1  -6   8      942.84      944.83      9.23 o 
   0  -6   8      450.88      418.55      6.74 o 
   1  -6   8        0.00       -1.60      1.82 o 
   2  -6   8       19.36       23.48      2.30 o 
   3  -6   8       17.98       22.65      2.14 o 
   4  -6   8       25.32       22.83      1.86 o 
   5  -6   8        1.76        0.54      1.50 o 
   6  -6   8        5.55        0.61      2.60 o 
   7  -6   8        1.26        1.29      2.72 o 
  -8  -5   8        7.60        4.28      2.61 o 
  -7  -5   8        0.42       -0.60      2.06 o 
  -6  -5   8       46.47       51.68      8.81 o 
  -5  -5   8       13.29       13.14      1.89 o 
  -4  -5   8        9.39        6.31      1.59 o 
  -3  -5   8       55.14       60.70      2.97 o 
  -2  -5   8       26.92       25.23      2.65 o 
   0  -5   8      380.20      362.62      6.29 o 
   1  -5   8      150.14      150.36      5.01 o 
   2  -5   8        0.41        0.23      1.15 o 
   3  -5   8       50.65       55.86      2.86 o 
   4  -5   8        4.12        4.80      1.52 o 
   5  -5   8        1.09        2.43      1.26 o 
   6  -5   8        0.01       -0.60      2.34 o 
   7  -5   8        2.23       -2.00      2.64 o 
  -8  -4   8       11.18        9.76      2.99 o 
  -7  -4   8        8.51       10.87      3.11 o 
  -6  -4   8      100.19       99.95     10.63 o 
  -5  -4   8      440.61      408.53      6.67 o 
  -4  -4   8        3.34        2.14      1.76 o 
  -3  -4   8      262.55      217.16      5.82 o 
  -2  -4   8       26.67       22.72      2.06 o 
  -1  -4   8     2989.12     2749.87     21.24 o 
   0  -4   8      248.59      228.11      4.60 o 
   1  -4   8       95.88       97.02      2.67 o 
   2  -4   8       27.78       24.30      1.66 o 
   3  -4   8       16.77       16.21      1.55 o 
   4  -4   8        0.26        0.27      1.14 o 
   5  -4   8        7.53        6.24      1.34 o 
   6  -4   8        0.13       -1.54      1.59 o 
   7  -4   8        0.80       -1.53      1.81 o 
   8  -4   8        0.05       -1.04      4.02 o 
  -8  -3   8        1.26        2.10      2.25 o 
  -7  -3   8        1.80        0.14      2.27 o 
  -6  -3   8      103.65      107.02      5.13 o 
  -5  -3   8       17.67       16.13      1.93 o 
  -4  -3   8       56.49       42.30      2.59 o 
  -3  -3   8        0.15        0.66      1.35 o 
  -2  -3   8       24.82       19.73      1.96 o 
  -1  -3   8        2.23        6.70      1.39 o 
   0  -3   8       71.96       88.89      3.05 o 
   1  -3   8       10.40       10.91      1.15 o 
   2  -3   8       10.63       13.38      1.31 o 
   3  -3   8       19.16       18.40      1.55 o 
   4  -3   8        0.23        0.32      1.15 o 
   5  -3   8       14.59       12.03      1.45 o 
   6  -3   8        1.19        0.01      1.53 o 
   7  -3   8        0.80       -0.40      1.99 o 
   8  -3   8        0.64       -2.66      1.78 o 
  -8  -2   8        0.12        0.20      2.12 o 
  -7  -2   8        0.38       -1.95      2.06 o 
  -6  -2   8      208.85      221.57      7.71 o 
  -5  -2   8       18.15       15.41      1.90 o 
  -4  -2   8        4.11        0.83      1.38 o 
  -3  -2   8        2.50        4.46      1.37 o 
  -2  -2   8       21.36       25.07      1.42 o 
  -1  -2   8        2.16        0.75      0.63 o 
   0  -2   8        1.66        2.79      0.75 o 
   1  -2   8      764.68      749.95      6.60 o 
   2  -2   8        7.63        8.44      1.11 o 
   3  -2   8       17.49       15.54      1.40 o 
   4  -2   8       20.62       22.98      1.61 o 
   5  -2   8       33.91       30.73      1.88 o 
   6  -2   8        3.06        3.75      1.68 o 
   7  -2   8        0.16        1.15      1.65 o 
   8  -2   8        0.98        1.10      1.85 o 
  -8  -1   8        6.23        7.75      2.71 o 
  -7  -1   8        0.11        1.77      3.18 o 
  -6  -1   8        4.28        4.41      2.20 o 
  -5  -1   8       27.39       24.49      2.16 o 
  -4  -1   8       46.36       46.98      2.14 o 
  -2  -1   8      127.68      130.63      2.92 o 
  -1  -1   8        0.18       -0.48      0.64 o 
   0  -1   8      391.95      387.98      4.18 o 
   1  -1   8       27.45       27.93      1.46 o 
   2  -1   8        0.36       -0.67      0.77 o 
   3  -1   8       68.20       72.73      2.41 o 
   4  -1   8        1.17        1.07      1.10 o 
   5  -1   8        5.85        5.33      1.22 o 
   6  -1   8       22.26       17.55      2.21 o 
   7  -1   8        0.04       -0.74      1.52 o 
   8  -1   8        0.69       -3.19      2.59 o 
  -8   0   8       11.11       12.72      4.60 o 
  -7   0   8       17.01       15.54      2.85 o 
  -6   0   8        9.00        6.44      2.76 o 
  -5   0   8        2.32        2.78      1.40 o 
  -4   0   8       77.67       59.03      2.40 o 
  -3   0   8        6.52        5.41      1.06 o 
  -2   0   8       33.63       31.54      1.60 o 
  -1   0   8       51.24       61.15      1.85 o 
   0   0   8      153.23      173.78      2.76 o 
   1   0   8       63.97       56.30      2.92 o 
   2   0   8       36.58       32.35      1.51 o 
   3   0   8       29.89       33.40      1.62 o 
   4   0   8        3.25        4.60      1.12 o 
   5   0   8        7.59        7.30      1.28 o 
   6   0   8       26.62       23.20      3.76 o 
   7   0   8       19.48       11.71      1.94 o 
   8   0   8       19.62       15.36      2.93 o 
   9   0   8        1.40        0.18      2.23 o 
  -8   1   8        2.32        0.57      2.39 o 
  -7   1   8        8.56        7.41      1.97 o 
  -6   1   8       35.00       34.57      2.69 o 
  -5   1   8        1.00       -1.23      1.10 o 
  -4   1   8       53.24       53.49      2.35 o 
  -3   1   8      736.02      695.53      6.67 o 
  -2   1   8        5.34        7.70      1.05 o 
  -1   1   8       24.24       35.28      2.57 o 
   0   1   8       95.97       90.28      2.13 o 
   1   1   8     2147.88     2154.12     14.89 o 
   2   1   8       88.81       81.40      1.96 o 
   3   1   8       12.35       12.89      1.33 o 
   4   1   8       77.43       75.57      2.28 o 
   5   1   8        0.47       -0.06      1.02 o 
   6   1   8      248.49      270.32      6.76 o 
   7   1   8        0.29       -0.11      1.83 o 
   8   1   8        2.95        1.92      2.15 o 
   9   1   8        0.00       -1.62      2.32 o 
  -8   2   8        4.28        6.16      2.38 o 
  -7   2   8       18.85       18.53      2.41 o 
  -6   2   8       47.73       54.22      3.32 o 
  -5   2   8        0.44       -1.21      1.19 o 
  -4   2   8     1547.06     1565.09     16.48 o 
  -3   2   8       10.45       11.27      1.40 o 
  -2   2   8      322.15      308.12      4.04 o 
  -1   2   8        3.59        3.81      1.07 o 
   0   2   8      495.88      516.25      4.68 o 
   1   2   8       27.98       27.02      1.73 o 
   2   2   8      175.19      176.17      4.74 o 
   3   2   8       31.45       33.79      1.97 o 
   4   2   8       14.36       14.36      1.67 o 
   5   2   8       75.38       69.19      5.04 o 
   6   2   8        0.00        0.54      1.69 o 
   7   2   8       14.44       11.91      2.43 o 
   8   2   8        4.95        1.78      2.19 o 
   9   2   8        1.49        1.99      2.36 o 
  -8   3   8        0.94        3.15      2.43 o 
  -7   3   8        5.21        7.46      2.34 o 
  -6   3   8       19.09       17.26      2.25 o 
  -5   3   8        2.61        2.30      1.31 o 
  -4   3   8     1597.33     1541.98     12.03 o 
  -3   3   8      843.29      839.41      7.72 o 
  -2   3   8       30.63       26.29      1.53 o 
  -1   3   8       99.35      111.96      2.86 o 
   0   3   8        2.03        1.10      0.61 o 
   1   3   8     1128.59     1177.75     10.70 o 
   2   3   8       50.84       46.73      2.19 o 
   3   3   8       67.47       81.94      5.38 o 
   4   3   8       17.19       19.17      2.01 o 
   5   3   8       67.71       69.15      3.53 o 
   6   3   8      215.17      230.07      6.42 o 
   7   3   8        3.30        0.75      1.93 o 
   8   3   8        1.05        0.23      3.63 o 
   9   3   8        4.38        5.70      2.57 o 
  -7   4   8       18.84       20.18      2.88 o 
  -6   4   8        8.48       14.56      2.51 o 
  -5   4   8      354.61      373.05      5.45 o 
  -4   4   8      779.06      790.76      9.19 o 
  -3   4   8       37.96       35.80      1.91 o 
  -2   4   8      251.83      276.37      3.94 o 
  -1   4   8        0.11       -1.11      0.74 o 
   0   4   8      134.89      161.28      2.94 o 
   1   4   8       63.14       64.00      2.45 o 
   2   4   8       73.59       65.67      2.59 o 
   3   4   8       64.15       65.21      2.66 o 
   4   4   8        3.11        2.68      1.95 o 
   5   4   8        3.15        3.48      1.35 o 
   6   4   8       20.43       16.43      4.80 o 
   7   4   8        7.41        4.65      2.46 o 
   8   4   8       13.14       14.31      2.84 o 
   9   4   8        1.18       -0.29      2.29 o 
  -7   5   8        5.54       10.22      2.52 o 
  -6   5   8       57.61       72.55      6.03 o 
  -5   5   8        1.83       -0.24      1.35 o 
  -4   5   8      208.52      202.62      4.03 o 
  -3   5   8        6.01        9.06      1.40 o 
  -2   5   8        2.21        3.69      1.13 o 
  -1   5   8        2.96        3.51      0.96 o 
   0   5   8       70.77       67.84      1.87 o 
   1   5   8      106.95       87.84      2.79 o 
   2   5   8        5.79        3.96      1.18 o 
   3   5   8       21.17       18.61      1.67 o 
   4   5   8        1.72        0.60      1.69 o 
   5   5   8       13.78       13.87      1.70 o 
   6   5   8        0.81       -0.31      1.59 o 
   7   5   8        6.92        6.61      2.21 o 
   8   5   8       19.96       20.75      7.26 o 
   9   5   8        0.19       -2.20      2.11 o 
  -7   6   8        0.82        1.49      2.29 o 
  -6   6   8       10.89       16.02      2.84 o 
  -5   6   8      128.19      122.46      8.10 o 
  -4   6   8        2.30        2.89      1.39 o 
  -3   6   8      135.82      129.08      3.94 o 
  -2   6   8        0.66        1.10      1.06 o 
  -1   6   8        4.14        3.28      1.05 o 
   0   6   8       19.81       17.36      1.52 o 
   1   6   8        9.12        7.80      1.34 o 
   2   6   8       14.57       14.78      1.60 o 
   3   6   8        1.74        2.47      1.18 o 
   4   6   8        0.30       -0.18      1.14 o 
   5   6   8        1.51        1.39      1.29 o 
   6   6   8        0.05        1.59      1.71 o 
   7   6   8        0.28        3.71      1.92 o 
   8   6   8       56.33       47.04      3.93 o 
   9   6   8        0.83       -1.02      2.24 o 
  -6   7   8        5.12        6.77      2.47 o 
  -5   7   8       25.20       24.24      2.33 o 
  -4   7   8      205.36      190.95      4.63 o 
  -3   7   8        2.97        2.22      1.39 o 
  -2   7   8        0.56       -0.93      1.17 o 
  -1   7   8        0.36       -0.55      0.97 o 
   0   7   8       30.92       29.45      1.61 o 
   1   7   8        2.98        2.64      1.17 o 
   2   7   8       22.22       25.52      1.97 o 
   3   7   8       19.56       16.37      2.33 o 
   4   7   8       10.24        9.73      1.55 o 
   5   7   8        1.76        1.45      1.61 o 
   6   7   8        1.98        0.99      3.69 o 
   7   7   8       17.13       16.75      3.95 o 
   8   7   8       40.41       39.79      4.80 o 
   9   7   8       11.37        8.81      4.02 o 
  -6   8   8        3.78        0.71      2.20 o 
  -5   8   8        4.92        5.54      2.19 o 
  -4   8   8       15.01       17.48      2.32 o 
  -2   8   8        1.24        1.51      1.34 o 
  -1   8   8        0.65        0.03      1.17 o 
   0   8   8        1.40        1.14      1.12 o 
   1   8   8       22.43       27.64      3.58 o 
   2   8   8        1.64        1.38      1.19 o 
   3   8   8       36.90       37.38      2.32 o 
   4   8   8       23.29       23.64      2.02 o 
   5   8   8        0.21        0.09      1.25 o 
   6   8   8        4.09        5.14      1.99 o 
   7   8   8        3.92        4.13      2.15 o 
   8   8   8      135.01      129.00      5.74 o 
  -5   9   8        0.43        2.52      1.66 o 
  -4   9   8        2.07        2.27      1.59 o 
  -3   9   8       21.00       20.82      3.03 o 
  -2   9   8      239.24      233.85      5.11 o 
  -1   9   8        6.27        8.00      1.86 o 
   0   9   8        5.03        3.62      1.60 o 
   1   9   8        4.30        1.22      1.14 o 
   2   9   8       59.67       64.01      2.89 o 
   3   9   8        2.76        2.58      1.62 o 
   4   9   8       10.41        6.49      1.49 o 
   5   9   8        9.30        8.99      1.67 o 
   6   9   8        6.53        4.81      2.08 o 
   7   9   8       43.35       40.29      3.70 o 
   8   9   8        2.19        6.62      2.52 o 
  -5  10   8        0.81        2.21      1.72 o 
  -4  10   8        0.04        0.81      1.61 o 
  -3  10   8        0.37        0.78      1.53 o 
  -2  10   8       77.65       81.47      3.46 o 
  -1  10   8       51.19       48.42      3.53 o 
   0  10   8       32.94       33.76      6.87 o 
   1  10   8        0.02       -1.30      1.28 o 
   2  10   8        3.56        1.94      1.29 o 
   3  10   8      206.13      205.08      4.61 o 
   4  10   8        4.31        2.66      1.37 o 
   5  10   8        0.60        0.22      1.44 o 
   6  10   8        0.02        2.69      1.90 o 
   7  10   8       40.03       39.80      3.89 o 
   8  10   8       36.63       35.86      3.73 o 
  -4  11   8        0.06       -2.27      1.51 o 
  -3  11   8      146.35      132.91      5.45 o 
  -2  11   8       16.97       16.86      6.74 o 
  -1  11   8       22.86       23.46      3.89 o 
   0  11   8       15.99       17.59      2.59 o 
   1  11   8        0.03        2.95      1.60 o 
   2  11   8       59.60       56.27      3.62 o 
   3  11   8        0.18        0.71      1.56 o 
   4  11   8        0.76       -0.12      1.35 o 
   5  11   8        2.49        0.42      1.39 o 
   6  11   8        0.31       -1.54      1.87 o 
   7  11   8       11.74       15.76      2.95 o 
  -3  12   8        5.49        4.33      2.15 o 
  -2  12   8       24.55       33.02      3.30 o 
  -1  12   8        1.03       -1.81      1.65 o 
   0  12   8        8.21        6.99      2.07 o 
   1  12   8        3.10        4.22      2.59 o 
   2  12   8        6.88        9.66      2.20 o 
   3  12   8       17.20       18.15      2.52 o 
   4  12   8        4.13        1.94      1.83 o 
   5  12   8        0.99        0.84      1.48 o 
   6  12   8        0.12       -2.01      1.88 o 
   7  12   8        3.01        5.25      3.24 o 
  -2  13   8        0.34        3.18      2.06 o 
  -1  13   8       55.26       48.06      4.99 o 
   0  13   8        2.22        1.36      3.89 o 
   1  13   8        0.38        0.75      1.79 o 
   2  13   8        0.13       -2.27      1.88 o 
   3  13   8        1.34       -0.69      1.69 o 
   4  13   8        0.21        0.01      2.46 o 
   5  13   8        0.75       -4.02      2.79 o 
   6  13   8        0.70        5.89      2.32 o 
   0  14   8        5.95        5.31      2.11 o 
   1  14   8        2.57        3.85      2.08 o 
   2  14   8        0.03       -3.33      3.69 o 
   3  14   8        2.70        3.35      2.40 o 
   4  14   8       12.55       16.64      5.12 o 
  -2 -11   9       10.74        9.45      2.19 o 
  -1 -11   9       61.69       77.77      5.57 o 
   0 -11   9        0.22       -1.48      2.79 o 
  -4 -10   9        8.58       11.14      2.27 o 
  -3 -10   9        3.02        5.48      2.00 o 
  -1 -10   9       14.16       22.17      2.64 o 
   0 -10   9        4.71        1.34      3.18 o 
   1 -10   9        1.12       -1.64      1.67 o 
   2 -10   9        1.71        6.65      2.33 o 
  -5  -9   9        5.29        4.09      1.91 o 
  -4  -9   9       12.66       18.46      3.77 o 
  -3  -9   9        0.38        1.85      1.90 o 
  -2  -9   9       25.88       26.97      2.59 o 
  -1  -9   9       23.49       27.01      2.71 o 
   0  -9   9        1.48        2.07      1.63 o 
   1  -9   9        5.24        8.56      3.48 o 
   2  -9   9        0.62        1.97      1.80 o 
   3  -9   9        0.03        0.22      1.90 o 
   4  -9   9        0.20       -0.78      2.98 o 
  -6  -8   9        0.39       -3.38      2.25 o 
  -5  -8   9        3.72        7.22      1.90 o 
  -4  -8   9        5.04        2.15      2.28 o 
  -3  -8   9       31.57       25.98      2.58 o 
  -2  -8   9        1.40        0.12      1.35 o 
  -1  -8   9        2.63        5.87      2.63 o 
   0  -8   9       29.32       33.17      2.72 o 
   1  -8   9        1.19        1.68      1.55 o 
   2  -8   9        7.43        8.28      1.85 o 
   3  -8   9       12.50       10.52      2.33 o 
   4  -8   9        0.91       -1.49      1.82 o 
   5  -8   9        4.11        3.49      2.12 o 
  -6  -7   9        4.78       11.72      2.88 o 
  -5  -7   9        0.02        1.19      1.45 o 
  -4  -7   9        0.44        0.44      1.38 o 
  -3  -7   9        2.27        0.01      1.50 o 
  -2  -7   9       93.04       87.79      4.88 o 
  -1  -7   9        0.53        0.43      1.52 o 
   0  -7   9        2.96        4.21      1.64 o 
   1  -7   9        0.12        0.15      1.51 o 
   2  -7   9        9.04        5.55      2.18 o 
   3  -7   9        7.17        7.33      1.84 o 
   4  -7   9        8.53        6.69      2.16 o 
   5  -7   9        4.54        5.78      2.12 o 
  -7  -6   9        0.01       -1.12      2.30 o 
  -6  -6   9        3.59        2.83      2.33 o 
  -5  -6   9        0.01       -2.71      1.81 o 
  -4  -6   9        2.26        3.41      1.57 o 
  -3  -6   9       29.35       30.80      2.52 o 
  -2  -6   9      186.95      203.01      5.05 o 
  -1  -6   9      251.94      258.58      5.53 o 
   0  -6   9       17.95       14.43      2.12 o 
   1  -6   9      431.13      405.57      6.87 o 
   2  -6   9        3.93        6.25      2.69 o 
   3  -6   9       94.82       72.49      3.41 o 
   4  -6   9        2.70        2.81      1.56 o 
   5  -6   9       68.06       76.63      3.51 o 
   6  -6   9       20.81       18.96      3.39 o 
  -7  -5   9        5.96        2.59      2.98 o 
  -6  -5   9        0.03       -1.36      2.04 o 
  -5  -5   9       19.78       18.01      2.15 o 
  -4  -5   9       12.14       10.87      1.84 o 
  -3  -5   9       15.55       10.82      1.83 o 
  -2  -5   9      101.27      105.03      3.80 o 
  -1  -5   9      111.82      116.97      3.90 o 
   0  -5   9     2548.65     2550.11     20.90 o 
   1  -5   9       71.40       67.56      3.25 o 
   2  -5   9       40.78       38.68      2.95 o 
   3  -5   9        3.38        1.98      1.37 o 
   4  -5   9        2.58        3.39      1.32 o 
   5  -5   9       19.81       17.85      1.84 o 
   6  -5   9        1.84        1.88      3.50 o 
   7  -5   9        5.23        6.99      3.07 o 
  -7  -4   9       11.66       17.04      3.19 o 
  -6  -4   9       14.24        7.70      2.32 o 
  -5  -4   9        0.72       -2.11      1.41 o 
  -4  -4   9       32.64       33.40      2.48 o 
  -3  -4   9        0.39        1.81      1.33 o 
  -2  -4   9      269.20      287.22      6.04 o 
  -1  -4   9       51.54       45.11      5.68 o 
   0  -4   9       87.90      105.94      5.33 o 
   1  -4   9      916.38      837.03      9.64 o 
   2  -4   9       40.04       36.70      2.71 o 
   3  -4   9        0.59        1.39      1.19 o 
   4  -4   9        6.27        5.65      1.52 o 
   5  -4   9       43.84       40.76      2.28 o 
   6  -4   9        3.76        1.91      1.75 o 
   7  -4   9       12.11       14.67      3.30 o 
  -7  -3   9        0.18        0.20      2.20 o 
  -6  -3   9        9.26       13.19      2.78 o 
  -5  -3   9      232.54      201.35      4.87 o 
  -4  -3   9      131.60      138.34      6.31 o 
  -3  -3   9       78.65       73.37      3.22 o 
  -2  -3   9        5.10        5.56      1.56 o 
  -1  -3   9      862.81      878.23      9.64 o 
   0  -3   9      535.38      504.23      7.02 o 
   1  -3   9      215.12      212.41      3.60 o 
   2  -3   9       43.10       40.50      1.95 o 
   3  -3   9        0.24       -1.33      1.07 o 
   4  -3   9        9.47        9.71      1.52 o 
   5  -3   9        0.11        0.51      1.18 o 
   6  -3   9        0.72       -1.30      1.57 o 
   7  -3   9        1.19       -2.53      3.18 o 
   8  -3   9        0.19       -3.54      2.36 o 
  -7  -2   9        2.33        0.52      3.24 o 
  -6  -2   9        0.02       -2.44      3.05 o 
  -5  -2   9      233.55      238.46      5.20 o 
  -4  -2   9       28.61       24.37      2.21 o 
  -3  -2   9        7.85        5.50      1.49 o 
  -2  -2   9      114.59      117.47      3.60 o 
  -1  -2   9       33.45       32.26      2.90 o 
   0  -2   9       12.66       12.93      1.15 o 
   1  -2   9        0.35       -0.17      0.91 o 
   2  -2   9        4.63        5.39      1.39 o 
   3  -2   9        0.31       -0.69      1.08 o 
   4  -2   9       20.72       21.16      1.66 o 
   5  -2   9       11.65       12.30      1.48 o 
   6  -2   9       14.81       11.23      2.43 o 
   7  -2   9        3.24        3.18      2.24 o 
   8  -2   9        0.22       -2.62      2.23 o 
  -8  -1   9        1.79       -2.25      2.30 o 
  -7  -1   9        2.86        1.42      6.55 o 
  -5  -1   9       59.61       63.82      3.17 o 
  -4  -1   9       37.94       37.07      3.30 o 
  -3  -1   9        0.46       -0.37      1.26 o 
  -2  -1   9        0.73        0.20      0.77 o 
  -1  -1   9      163.82      176.99      2.98 o 
   0  -1   9       46.00       44.13      1.77 o 
   1  -1   9       57.82       63.23      2.28 o 
   2  -1   9       38.54       40.20      1.96 o 
   3  -1   9       43.45       38.07      1.90 o 
   4  -1   9        7.19        6.70      1.28 o 
   5  -1   9       17.54       19.39      1.90 o 
   6  -1   9       17.42       16.98      2.67 o 
   7  -1   9        2.30        3.24      2.20 o 
   8  -1   9        2.13        2.33      3.24 o 
  -8   0   9        3.41        0.27      2.45 o 
  -7   0   9        3.79        5.99      2.53 o 
  -6   0   9        3.20        3.57      2.10 o 
  -5   0   9      242.27      279.76      6.43 o 
  -4   0   9        2.39        1.73      1.07 o 
  -3   0   9       96.15      105.74      2.78 o 
  -2   0   9        0.57        1.88      0.84 o 
  -1   0   9      138.34      143.83      2.78 o 
   0   0   9        5.15        3.96      0.87 o 
   1   0   9        2.18        2.86      0.88 o 
   2   0   9      424.44      432.43      4.81 o 
   3   0   9       73.96       72.14      2.84 o 
   4   0   9       19.16       21.78      1.91 o 
   5   0   9        1.13        0.10      1.29 o 
   6   0   9        3.01        2.43      1.87 o 
   7   0   9        0.04       -1.01      1.96 o 
   8   0   9        2.28        2.85      2.43 o 
  -7   1   9        9.77       13.23      2.95 o 
  -6   1   9      128.61      121.98      5.41 o 
  -5   1   9       14.83       15.63      1.63 o 
  -4   1   9      102.56      101.26      2.95 o 
  -3   1   9       15.71       13.23      1.45 o 
  -2   1   9       48.44       39.60      1.88 o 
  -1   1   9       20.80       18.89      1.27 o 
   0   1   9       14.24       17.47      1.16 o 
   1   1   9      205.72      216.62      4.18 o 
   2   1   9       10.29        8.10      1.40 o 
   3   1   9      117.89      111.21      3.32 o 
   4   1   9       18.23       18.64      1.82 o 
   5   1   9       71.19       74.55      3.76 o 
   6   1   9        0.01       -0.33      1.68 o 
   7   1   9        3.49        3.36      2.10 o 
   8   1   9       14.49       11.17      3.30 o 
   9   1   9        1.86        2.79      2.66 o 
  -7   2   9        0.76       -0.63      2.28 o 
  -6   2   9        1.27        0.22      1.66 o 
  -5   2   9       49.62       47.17      2.42 o 
  -4   2   9        0.00       -1.42      1.09 o 
  -3   2   9      890.30      907.21      8.24 o 
  -2   2   9       14.73       19.05      1.42 o 
  -1   2   9      179.27      201.78      3.16 o 
   0   2   9       56.19       61.61      1.78 o 
   1   2   9       35.51       33.19      1.96 o 
   2   2   9      973.69      952.68      9.65 o 
   3   2   9       32.99       30.45      3.11 o 
   4   2   9        1.57        0.30      1.18 o 
   5   2   9        3.64        3.64      1.35 o 
   6   2   9       10.65        4.88      2.08 o 
   7   2   9        7.75        9.21      3.69 o 
   8   2   9        3.08        2.48      2.27 o 
   9   2   9        1.00        0.56      2.47 o 
  -7   3   9        1.14        1.22      1.97 o 
  -6   3   9       11.09       11.13      2.07 o 
  -5   3   9      119.29      117.77      3.42 o 
  -4   3   9        4.63        4.89      1.45 o 
  -3   3   9      392.83      397.85      7.42 o 
  -2   3   9       26.81       29.84      2.03 o 
  -1   3   9        0.24        0.36      0.78 o 
   0   3   9      273.23      268.56      5.66 o 
   1   3   9      133.68      142.68      3.56 o 
   2   3   9        1.03       -0.49      2.01 o 
   3   3   9      147.07      140.11      3.64 o 
   4   3   9        0.01       -1.45      1.13 o 
   5   3   9       14.87       12.37      1.69 o 
   6   3   9        9.65       10.69      2.23 o 
   7   3   9       41.06       45.76      4.28 o 
   8   3   9        0.81        1.70      2.21 o 
   9   3   9        2.68       -2.04      2.15 o 
  -7   4   9        2.29        2.12      2.21 o 
  -6   4   9        2.06        4.69      2.06 o 
  -5   4   9        3.90        2.69      1.33 o 
  -4   4   9       10.36       11.96      1.59 o 
  -3   4   9     1437.74     1428.10     11.34 o 
  -2   4   9      175.53      182.61      3.55 o 
  -1   4   9      141.44      137.60      2.75 o 
   0   4   9       11.38       12.66      1.51 o 
   1   4   9      725.17      740.54      8.28 o 
   2   4   9        7.79        7.09      1.40 o 
   3   4   9        0.04        0.66      1.15 o 
   4   4   9       31.69       36.07      2.58 o 
   5   4   9        0.61        1.35      1.30 o 
   6   4   9       13.12       13.99      2.36 o 
   7   4   9        3.98        3.21      2.06 o 
   8   4   9        0.34        0.06      2.06 o 
   9   4   9        0.01       -4.76      3.18 o 
  -7   5   9       31.19       43.41      6.03 o 
  -6   5   9        1.93        2.14      2.02 o 
  -5   5   9       41.54       45.66      2.79 o 
  -4   5   9       52.16       53.29      2.48 o 
  -3   5   9     2161.16     2155.13     15.41 o 
  -2   5   9       12.36       11.22      1.35 o 
  -1   5   9       49.57       54.06      2.78 o 
   0   5   9       69.71       66.96      2.92 o 
   1   5   9       41.21       44.56      2.38 o 
   2   5   9       20.34       18.78      1.79 o 
   3   5   9        7.71        5.12      1.30 o 
   4   5   9        2.24        4.68      1.47 o 
   5   5   9        8.84        7.19      1.53 o 
   6   5   9       10.93       11.45      2.66 o 
   7   5   9        4.61        5.29      2.15 o 
   8   5   9        4.83        3.87      2.29 o 
   9   5   9        3.22       -1.24      3.89 o 
  -6   6   9        4.28        5.17      2.20 o 
  -5   6   9        8.00        8.84      2.11 o 
  -4   6   9       91.55       93.90      3.57 o 
  -3   6   9        3.43        8.12      1.59 o 
  -2   6   9        0.11        1.26      1.14 o 
  -1   6   9        2.23        1.37      1.69 o 
   0   6   9        0.89        0.25      1.17 o 
   1   6   9       12.50       11.13      1.52 o 
   2   6   9        0.64        0.73      1.13 o 
   3   6   9        4.31        2.33      1.23 o 
   4   6   9        0.12       -1.35      1.18 o 
   5   6   9        4.90        4.60      1.44 o 
   6   6   9        0.60        2.71      1.84 o 
   7   6   9        0.24       -1.51      2.33 o 
   8   6   9        0.01        2.16      2.24 o 
   9   6   9        0.19        1.34      2.29 o 
  -6   7   9        1.43        0.52      2.14 o 
  -5   7   9       19.20       24.73      2.43 o 
  -4   7   9       12.21       12.82      2.07 o 
  -2   7   9       20.14       23.34      2.60 o 
  -1   7   9        4.66       10.58      1.64 o 
   0   7   9        1.31        0.97      1.21 o 
   1   7   9       23.11       18.18      2.37 o 
   2   7   9        7.23        7.93      1.46 o 
   3   7   9       16.17       14.78      1.70 o 
   4   7   9        0.23       -0.29      1.12 o 
   5   7   9        4.61        1.91      1.41 o 
   6   7   9        3.30        2.50      1.88 o 
   7   7   9        5.32        3.61      2.08 o 
   8   7   9        3.62       -0.73      2.15 o 
  -6   8   9        1.86       -1.37      2.06 o 
  -5   8   9        4.22        5.72      2.66 o 
  -4   8   9       13.04       16.58      2.06 o 
  -3   8   9        4.07        1.50      2.98 o 
  -2   8   9        0.17       -2.13      1.42 o 
  -1   8   9       37.01       31.57      2.79 o 
   0   8   9       13.86       16.72      1.76 o 
   1   8   9        0.41        1.72      1.18 o 
   2   8   9       10.46        9.96      1.86 o 
   3   8   9        1.49        1.52      1.23 o 
   4   8   9       15.42       21.78      4.00 o 
   5   8   9        5.21        3.97      1.41 o 
   6   8   9        0.09       -1.01      1.68 o 
   7   8   9       13.46       11.89      4.99 o 
   8   8   9        0.99        1.10      2.23 o 
  -5   9   9        0.20       -0.58      2.59 o 
  -4   9   9        6.41        9.85      2.29 o 
  -3   9   9       26.65       26.17      3.56 o 
  -2   9   9       23.75       21.87      6.93 o 
  -1   9   9       93.35       90.59      8.23 o 
   0   9   9        4.66        1.88      1.60 o 
   1   9   9       21.23       20.06      3.11 o 
   2   9   9        9.07        7.55      1.52 o 
   3   9   9        1.54        2.10      1.30 o 
   4   9   9       36.91       36.00      2.45 o 
   5   9   9        2.49        1.02      1.37 o 
   6   9   9       11.49        5.10      2.59 o 
   7   9   9        7.01        8.06      2.43 o 
   8   9   9       15.06       13.02      3.76 o 
  -4  10   9        0.07        1.26      1.92 o 
  -3  10   9        0.17       -0.20      1.83 o 
  -2  10   9        1.34        2.33      1.83 o 
  -1  10   9       97.73       84.09      4.26 o 
   0  10   9        8.66        6.90      1.97 o 
   1  10   9        8.75        7.25      1.86 o 
   2  10   9       18.13       15.08      1.84 o 
   3  10   9        0.05       -0.80      1.22 o 
   4  10   9       21.49       21.32      2.12 o 
   5  10   9        5.65        4.45      1.56 o 
   6  10   9       12.18       10.73      3.24 o 
   7  10   9        0.35        0.88      2.24 o 
  -4  11   9        8.55        4.62      4.28 o 
  -3  11   9        2.96        2.54      1.96 o 
  -2  11   9        5.95        4.90      2.10 o 
  -1  11   9       13.80       13.42      2.43 o 
   0  11   9       31.54       32.78      4.67 o 
   1  11   9       16.13       17.30      2.43 o 
   2  11   9        0.00        0.05      1.60 o 
   3  11   9        1.45        1.17      1.77 o 
   4  11   9        7.73        3.70      1.56 o 
   5  11   9        0.00        0.51      1.95 o 
   6  11   9        2.29        0.61      1.63 o 
   7  11   9        0.27        1.60      2.38 o 
  -3  12   9        0.28        4.69      2.29 o 
  -2  12   9        3.72        4.65      2.10 o 
  -1  12   9       58.49       46.75      3.75 o 
   0  12   9        5.15        2.68      2.06 o 
   1  12   9        0.91        1.06      1.79 o 
   2  12   9        2.39        1.14      1.77 o 
   3  12   9        3.13        3.46      3.11 o 
   4  12   9       14.47       10.53      2.34 o 
   5  12   9        2.08        1.34      1.60 o 
   6  12   9        2.31        0.25      2.53 o 
  -1  13   9       14.64       14.59      2.70 o 
   0  13   9        8.25       11.34      2.52 o 
   1  13   9        0.15       -0.84      1.68 o 
   2  13   9        8.83        8.93      2.32 o 
   3  13   9        5.06        1.08      1.99 o 
   4  13   9        0.80        0.29      1.88 o 
   5  13   9        0.02        2.53      2.11 o 
   1  14   9        0.56       -0.17      1.96 o 
   2  14   9        1.47       -1.65      1.79 o 
   3  14   9        2.61        2.58      2.85 o 
  -2 -10  10        0.00        2.37      1.82 o 
  -1 -10  10       11.29       13.80      2.41 o 
   0 -10  10       13.18       11.73      2.52 o 
   1 -10  10        0.68       -3.30      2.20 o 
  -4  -9  10        0.07        0.93      1.74 o 
  -2  -9  10        1.28        2.06      1.74 o 
  -1  -9  10      131.17      151.12      6.26 o 
   0  -9  10       22.52       27.80      2.78 o 
   1  -9  10        2.25        0.72      2.05 o 
   2  -9  10        7.59        4.24      3.82 o 
   3  -9  10        2.74       -0.41      2.98 o 
  -5  -8  10        6.99        2.51      1.91 o 
  -4  -8  10       10.15       10.27      2.89 o 
  -3  -8  10        0.33        0.39      1.89 o 
  -2  -8  10       20.46       19.05      2.43 o 
  -1  -8  10        1.64        4.74      2.40 o 
   0  -8  10       62.07       63.76      3.49 o 
   1  -8  10        0.06        0.15      1.66 o 
   2  -8  10        2.06        2.58      1.66 o 
   3  -8  10        0.42       -1.44      1.82 o 
   4  -8  10        1.49        1.36      2.06 o 
  -5  -7  10        0.10       -0.53      2.14 o 
  -4  -7  10        0.11       -1.10      1.39 o 
  -3  -7  10        5.82       10.71      3.99 o 
  -2  -7  10        2.50        3.38      1.68 o 
  -1  -7  10        0.21       -0.37      1.50 o 
   0  -7  10        1.30        0.68      1.55 o 
   1  -7  10      113.44      123.11      4.31 o 
   2  -7  10        1.23        0.36      2.53 o 
   3  -7  10        7.09       12.90      2.21 o 
   4  -7  10       23.74       21.23      2.92 o 
   5  -7  10        0.71       -0.08      1.96 o 
  -6  -6  10        1.75        2.14      2.42 o 
  -5  -6  10        2.08        5.07      1.76 o 
  -4  -6  10        1.56        2.05      1.83 o 
  -3  -6  10        2.22        5.00      1.70 o 
  -2  -6  10        0.02       -0.88      1.70 o 
  -1  -6  10        1.24        2.03      1.56 o 
   0  -6  10       11.15       14.68      2.10 o 
   1  -6  10        0.37       -0.26      1.55 o 
   2  -6  10       84.53       88.09      3.75 o 
   3  -6  10       20.67       19.42      2.30 o 
   4  -6  10        4.33        4.50      1.71 o 
   5  -6  10        4.51        2.43      4.15 o 
  -6  -5  10        0.02       -0.35      2.12 o 
  -5  -5  10        0.01       -0.82      1.47 o 
  -4  -5  10       11.69       11.46      2.12 o 
  -3  -5  10        0.45        0.07      1.54 o 
  -2  -5  10       27.32       27.29      3.68 o 
  -1  -5  10      391.43      419.04      5.97 o 
   0  -5  10       37.51       36.25      2.76 o 
   1  -5  10      105.95      102.26      4.06 o 
   2  -5  10        3.97        1.77      1.68 o 
   3  -5  10       14.95       21.20      2.92 o 
   4  -5  10       43.82       45.30      2.90 o 
   5  -5  10        4.00        5.14      3.10 o 
   6  -5  10       11.35        8.94      4.02 o 
  -7  -4  10        0.61       -1.28      2.66 o 
  -6  -4  10        1.11        3.82      2.41 o 
  -5  -4  10        0.80        3.44      1.63 o 
  -4  -4  10        0.00       -1.47      2.28 o 
  -3  -4  10      173.26      149.44      4.34 o 
  -2  -4  10       17.51       13.58      2.28 o 
  -1  -4  10      140.69      129.58      4.08 o 
   0  -4  10      157.85      157.38      6.74 o 
   1  -4  10      572.45      575.68      8.02 o 
   2  -4  10      111.36      116.98      3.97 o 
   3  -4  10        0.47       -0.84      1.44 o 
   4  -4  10        0.00        0.15      1.22 o 
   5  -4  10       16.99       19.32      3.51 o 
   6  -4  10        9.33       10.59      2.70 o 
   7  -4  10        0.00       -5.05      3.63 o 
  -7  -3  10        6.40        2.35      2.43 o 
  -6  -3  10       26.99       22.59      3.23 o 
  -5  -3  10        2.03        2.03      1.51 o 
  -4  -3  10       41.21       31.79      2.53 o 
  -3  -3  10        0.97        1.86      1.44 o 
  -2  -3  10       24.45       22.97      2.12 o 
  -1  -3  10       35.27       41.44      3.47 o 
   0  -3  10        8.23        8.28      1.76 o 
   1  -3  10        0.37        4.71      1.69 o 
   2  -3  10      105.57       99.95      3.67 o 
   3  -3  10       57.19       52.97      2.51 o 
   4  -3  10        0.48       -1.45      1.19 o 
   5  -3  10       25.15       30.87      2.41 o 
   6  -3  10        3.80        3.51      2.34 o 
   7  -3  10        0.32       -3.26      2.18 o 
  -7  -2  10        2.59        0.75      2.66 o 
  -6  -2  10       16.38       13.17      3.24 o 
  -5  -2  10       17.95       18.39      2.20 o 
  -4  -2  10      165.35      131.52      4.17 o 
  -3  -2  10      627.27      573.53      7.89 o 
  -2  -2  10        4.48        2.27      1.44 o 
  -1  -2  10      263.14      216.45      4.68 o 
   0  -2  10       77.96       66.38      2.94 o 
   1  -2  10     2062.22     1962.68     13.82 o 
   2  -2  10      138.48      133.65      3.14 o 
   3  -2  10       42.84       45.93      2.49 o 
   4  -2  10        9.45        8.11      2.25 o 
   5  -2  10       10.84       11.34      1.73 o 
   6  -2  10        1.78       -0.31      1.97 o 
   7  -2  10        0.96       -3.09      2.06 o 
  -7  -1  10       14.83       23.29      3.48 o 
  -6  -1  10        1.50       -1.30      4.15 o 
  -5  -1  10        3.65        1.69      2.47 o 
  -4  -1  10      197.44      205.63      5.33 o 
  -3  -1  10       15.95       16.21      1.95 o 
  -2  -1  10       46.54       38.65      2.42 o 
  -1  -1  10        4.79        9.43      1.63 o 
   0  -1  10        3.11        1.30      0.96 o 
   1  -1  10       92.09       98.20      2.68 o 
   2  -1  10        0.21        0.89      1.18 o 
   3  -1  10       11.70        9.93      1.63 o 
   4  -1  10        0.21       -1.43      1.20 o 
   5  -1  10        1.96       -1.05      1.23 o 
   6  -1  10        0.08       -0.69      1.90 o 
   7  -1  10        0.42       -0.13      2.98 o 
   8  -1  10        0.71       -3.11      3.24 o 
  -7   0  10        0.27       -2.95      2.13 o 
  -6   0  10        0.39       -1.64      2.01 o 
  -5   0  10        0.01       -2.11      1.43 o 
  -4   0  10      528.47      522.95      7.65 o 
  -3   0  10       17.54       17.43      2.18 o 
  -2   0  10        0.37        0.12      0.87 o 
  -1   0  10        7.02       10.43      1.18 o 
   0   0  10       39.82       40.76      1.84 o 
   1   0  10       10.90        7.67      1.36 o 
   2   0  10       25.15       27.57      2.04 o 
   3   0  10      159.73      161.39      4.02 o 
   4   0  10        0.05       -1.77      1.18 o 
   5   0  10        2.35        2.77      1.42 o 
   6   0  10        2.01        1.05      2.01 o 
   7   0  10        5.79        5.22      2.85 o 
   8   0  10        0.10       -0.35      2.19 o 
  -7   1  10        0.79        2.67      3.43 o 
  -6   1  10        7.13        6.35      2.47 o 
  -5   1  10        0.24       -0.42      2.04 o 
  -4   1  10        0.00        0.51      1.55 o 
  -3   1  10       13.21        8.89      1.27 o 
  -2   1  10        3.05        4.67      1.27 o 
  -1   1  10        3.42       -0.06      1.25 o 
   0   1  10        2.66        6.95      1.31 o 
   1   1  10        1.10       -0.39      1.15 o 
   2   1  10      103.11      104.29      3.37 o 
   3   1  10        8.10        4.86      1.88 o 
   4   1  10        0.01        0.36      1.23 o 
   5   1  10       19.32       18.09      1.94 o 
   6   1  10        0.86       -2.57      1.71 o 
   7   1  10        0.77       -0.21      2.05 o 
   8   1  10        8.05        7.89      2.61 o 
  -7   2  10       12.24        8.57      2.88 o 
  -6   2  10       20.30       27.26      3.43 o 
  -5   2  10       45.78       43.55      3.16 o 
  -4   2  10       48.37       47.03      2.30 o 
  -3   2  10        0.12       -0.37      1.06 o 
  -2   2  10       40.28       34.39      1.82 o 
  -1   2  10       25.99       24.41      1.97 o 
   0   2  10        2.59        1.28      1.13 o 
   1   2  10       98.83      108.66      5.06 o 
   2   2  10        2.06        1.78      1.27 o 
   3   2  10        0.17        0.65      1.62 o 
   4   2  10       10.05       11.23      1.79 o 
   5   2  10        0.36        1.90      1.37 o 
   6   2  10        0.54        3.20      1.92 o 
   7   2  10        2.25        2.18      2.10 o 
   8   2  10        7.66        7.99      3.43 o 
  -7   3  10        3.27        4.80      3.37 o 
  -6   3  10        0.03       -3.11      3.02 o 
  -5   3  10        3.88        0.98      1.33 o 
  -4   3  10        6.80        5.74      1.38 o 
  -3   3  10        6.56        2.59      1.38 o 
  -2   3  10       19.93       17.37      1.66 o 
  -1   3  10      376.35      383.21      7.05 o 
   0   3  10       16.83       17.66      1.78 o 
   1   3  10        1.71        2.61      1.27 o 
   2   3  10       21.15       18.21      1.77 o 
   3   3  10      424.44      422.26      5.47 o 
   4   3  10        5.09        1.78      1.36 o 
   5   3  10        4.60        4.25      1.47 o 
   6   3  10        6.35        5.62      2.08 o 
   7   3  10        0.06        0.26      2.08 o 
   8   3  10       26.90       30.03      3.53 o 
  -6   4  10        0.29        1.61      2.98 o 
  -5   4  10       44.75       46.10      2.55 o 
  -4   4  10       85.62       90.97      3.06 o 
  -3   4  10        0.32       -1.18      1.11 o 
  -2   4  10      814.77      813.97      9.56 o 
  -1   4  10       20.42       23.62      2.09 o 
   0   4  10       71.19       68.72      4.22 o 
   1   4  10        0.15        0.06      1.14 o 
   2   4  10       99.83      105.81      3.35 o 
   3   4  10        6.05        4.80      1.45 o 
   4   4  10       23.82       23.14      2.67 o 
   5   4  10        3.67        2.66      1.33 o 
   6   4  10        3.52        2.67      2.79 o 
   7   4  10        6.45        6.67      2.47 o 
   8   4  10        0.10       -0.76      2.15 o 
  -6   5  10        0.14        4.37      2.10 o 
  -5   5  10        0.14       -1.69      1.34 o 
  -4   5  10       24.57       25.75      2.00 o 
  -3   5  10        6.40        5.26      1.70 o 
  -2   5  10     1031.31     1001.24     10.97 o 
  -1   5  10      515.65      515.85      7.28 o 
   0   5  10       20.78       21.12      1.96 o 
   1   5  10       25.45       25.00      2.02 o 
   2   5  10        0.04       -0.85      1.12 o 
   3   5  10      250.50      241.69      4.97 o 
   4   5  10       18.06       16.02      1.84 o 
   5   5  10        4.37        5.60      1.50 o 
   6   5  10        4.26        2.41      2.66 o 
   7   5  10       10.65        9.46      2.53 o 
   8   5  10       21.30       23.72      3.47 o 
  -6   6  10        0.03       -0.02      1.97 o 
  -5   6  10       35.61       35.70      2.98 o 
  -4   6  10        1.22        2.01      2.46 o 
  -3   6  10      418.92      454.03      8.71 o 
  -2   6  10      559.18      561.27      8.00 o 
  -1   6  10       70.39       68.21      3.19 o 
   0   6  10      136.26      159.24      5.58 o 
   1   6  10        8.65        9.55      1.59 o 
   2   6  10       42.50       49.80      2.82 o 
   3   6  10       26.66       21.28      2.54 o 
   4   6  10        3.59        1.35      2.91 o 
   5   6  10        7.69        4.79      1.86 o 
   6   6  10        0.06       -0.73      1.81 o 
   7   6  10        1.21        2.35      2.10 o 
   8   6  10        4.46        4.53      2.36 o 
  -5   7  10        0.00        3.96      2.66 o 
  -4   7  10       50.39       53.17      5.31 o 
  -3   7  10       19.27       15.05      2.66 o 
  -2   7  10      242.40      251.78      6.60 o 
  -1   7  10        0.18        1.02      1.30 o 
   0   7  10        1.82        1.43      1.32 o 
   1   7  10        1.53        1.91      1.46 o 
   2   7  10       34.67       34.46      2.33 o 
   3   7  10        4.01        3.99      1.56 o 
   4   7  10        0.02        0.52      1.33 o 
   5   7  10        1.90        2.62      1.69 o 
   6   7  10        0.98        0.18      2.66 o 
   7   7  10        2.28       -0.56      1.99 o 
   8   7  10        1.40        0.98      2.32 o 
  -5   8  10        5.45        1.99      2.06 o 
  -4   8  10        4.87        7.63      2.24 o 
  -3   8  10      118.30      122.94      5.09 o 
  -2   8  10        1.47       -0.17      2.07 o 
  -1   8  10       81.90       85.47      4.92 o 
   0   8  10        0.89        0.99      1.94 o 
   1   8  10        2.50        3.49      1.33 o 
   2   8  10        0.02       -0.59      1.26 o 
   3   8  10        2.12        0.37      1.46 o 
   5   8  10        0.74       -0.62      1.33 o 
   6   8  10        0.99        3.99      2.08 o 
   7   8  10        0.88        0.76      2.08 o 
   8   8  10        0.34        1.04      2.20 o 
  -4   9  10        2.10        5.36      2.19 o 
  -3   9  10       34.64       29.92      3.20 o 
  -2   9  10      150.44      140.22      5.27 o 
  -1   9  10        7.24        6.70      2.05 o 
   0   9  10        0.27        1.09      1.60 o 
   1   9  10        0.25       -0.63      1.17 o 
   2   9  10        3.83        4.15      1.47 o 
   3   9  10        0.48        1.85      1.39 o 
   4   9  10        0.85        0.81      1.63 o 
   5   9  10        5.64        2.66      1.48 o 
   6   9  10        0.09       -1.59      1.87 o 
   7   9  10        0.10       -2.10      1.96 o 
  -4  10  10        5.25        4.71      2.40 o 
  -3  10  10        2.17        3.11      2.02 o 
  -2  10  10        0.01        1.04      1.88 o 
  -1  10  10       10.12        8.39      2.10 o 
   0  10  10        0.54       -1.78      1.68 o 
   1  10  10        0.10       -2.05      1.37 o 
   2  10  10        1.00       -0.21      1.81 o 
   3  10  10        1.15        0.37      1.47 o 
   4  10  10        1.50       -0.40      1.29 o 
   5  10  10        9.60        6.58      1.79 o 
   6  10  10        0.94        0.62      2.02 o 
   7  10  10        0.00        0.07      2.19 o 
  -3  11  10        0.74        2.66      2.01 o 
  -2  11  10        0.86        3.45      1.97 o 
  -1  11  10       15.39       13.00      2.47 o 
   0  11  10       52.86       50.63      3.74 o 
   1  11  10        6.23        6.39      2.01 o 
   2  11  10        1.00        1.87      2.33 o 
   3  11  10        0.40        1.85      1.79 o 
   4  11  10       16.32       13.97      2.01 o 
   5  11  10        2.22        2.30      1.86 o 
   6  11  10        1.30        1.01      1.73 o 
  -2  12  10        0.21        0.44      1.86 o 
  -1  12  10        0.25        0.94      2.01 o 
   0  12  10       31.87       32.46      7.13 o 
   1  12  10       11.20        9.08      2.27 o 
   2  12  10        7.98        8.90      2.23 o 
   3  12  10        0.47        0.52      1.74 o 
   4  12  10        1.45       -0.84      1.77 o 
   5  12  10       28.28       27.09      2.62 o 
   0  13  10        5.56        9.30      3.50 o 
   1  13  10        6.01        8.61      2.42 o 
   2  13  10        6.66       11.65      5.44 o 
   3  13  10        0.49        0.50      1.86 o 
   4  13  10        9.57        4.87      2.72 o 
  -2  -9  11       34.35       22.26      2.75 o 
  -1  -9  11        3.11        6.88      2.17 o 
   0  -9  11       22.63       22.83      2.74 o 
   1  -9  11       63.87       94.25     10.76 o 
  -4  -8  11        0.73        2.77      1.98 o 
  -3  -8  11       18.78       28.51      2.79 o 
  -2  -8  11        4.03        3.99      1.80 o 
  -1  -8  11        7.84       12.21      2.24 o 
   1  -8  11        6.70       11.51      2.25 o 
   2  -8  11        2.06        2.24      1.72 o 
   3  -8  11        0.12       -1.30      2.33 o 
  -4  -7  11        3.21        2.63      1.84 o 
  -3  -7  11        2.71        3.82      1.85 o 
  -2  -7  11       26.83       23.67      2.79 o 
  -1  -7  11        0.14       -0.64      1.57 o 
   0  -7  11        9.75       14.02      2.17 o 
   1  -7  11       14.15       16.81      2.31 o 
   2  -7  11        0.09       -0.34      1.59 o 
   3  -7  11        4.09        4.22      1.71 o 
   4  -7  11        0.34       -0.91      1.94 o 
  -5  -6  11        2.89        0.76      2.84 o 
  -4  -6  11        2.67        3.10      1.77 o 
  -3  -6  11        6.05        3.16      2.19 o 
  -2  -6  11        1.12        1.60      1.63 o 
  -1  -6  11       39.34       34.97      4.04 o 
   0  -6  11        0.07       -1.45      2.16 o 
   1  -6  11        0.44       -0.82      1.44 o 
   2  -6  11       15.40       13.78      2.14 o 
   3  -6  11        0.20       -2.23      1.59 o 
   4  -6  11        1.09        1.87      1.96 o 
   5  -6  11        1.39        4.02      2.59 o 
  -6  -5  11        3.87        5.46      2.68 o 
  -5  -5  11        1.78        3.64      2.57 o 
  -4  -5  11        3.47        5.07      1.81 o 
  -3  -5  11        0.06        0.91      1.60 o 
  -2  -5  11        0.30        0.85      1.60 o 
  -1  -5  11        0.01       -0.61      2.33 o 
   0  -5  11       35.94       34.06      3.87 o 
   1  -5  11        1.22        1.11      2.22 o 
   2  -5  11        0.98        1.22      2.19 o 
   3  -5  11        9.87        9.68      2.40 o 
   4  -5  11        4.49        7.59      2.24 o 
   5  -5  11        6.45        7.52      2.23 o 
  -6  -4  11       15.44       19.07      6.03 o 
  -5  -4  11        0.13        0.49      1.60 o 
  -4  -4  11        5.25        2.62      1.66 o 
  -3  -4  11        2.37        4.77      1.65 o 
  -2  -4  11        0.66        2.14      1.54 o 
  -1  -4  11       43.87       43.44      2.82 o 
   0  -4  11      139.62      154.41      4.48 o 
   1  -4  11      139.05      136.25      4.21 o 
   2  -4  11        0.92        3.49      2.18 o 
   3  -4  11      199.60      206.99      6.38 o 
   4  -4  11        1.11        2.51      1.99 o 
   5  -4  11       21.79       16.17      2.61 o 
   6  -4  11        1.77       -1.28      2.34 o 
  -6  -3  11        0.02        1.98      2.29 o 
  -5  -3  11        5.65        1.77      1.67 o 
  -4  -3  11        0.04       -0.38      1.98 o 
  -3  -3  11       17.24       10.84      1.93 o 
  -2  -3  11        9.55        8.80      2.94 o 
  -1  -3  11       37.67       32.57      2.45 o 
   0  -3  11      106.90      102.07      5.00 o 
   1  -3  11       72.63       82.31      7.00 o 
   2  -3  11     1294.27     1287.52     16.57 o 
   3  -3  11       46.37       49.49      3.76 o 
   4  -3  11       24.25       26.17      2.32 o 
   5  -3  11        4.44        6.21      1.70 o 
   6  -3  11        0.02       -1.19      2.15 o 
  -6  -2  11        1.08        4.47      2.40 o 
  -5  -2  11       25.41       28.28      3.00 o 
  -3  -2  11        1.16        2.55      1.78 o 
  -2  -2  11       77.90       75.86      3.33 o 
  -1  -2  11        0.35        1.42      1.35 o 
   0  -2  11      238.19      235.67      6.48 o 
   1  -2  11       13.10       11.39      2.37 o 
   2  -2  11      142.60      144.43     12.70 o 
   3  -2  11      434.96      429.01      6.67 o 
   4  -2  11        7.96        6.74      2.02 o 
   5  -2  11        3.06        2.69      2.11 o 
   6  -2  11        2.52        2.12      2.19 o 
   7  -2  11       10.43       15.31      3.16 o 
  -6  -1  11        9.29        9.37      2.73 o 
  -5  -1  11        3.30        0.31      1.53 o 
  -4  -1  11       10.70       14.15      1.99 o 
  -3  -1  11      362.28      297.02      7.46 o 
  -2  -1  11       61.19       58.58      2.94 o 
  -1  -1  11       69.30       73.71      3.10 o 
   0  -1  11        0.70        0.46      3.43 o 
   1  -1  11      486.36      514.36      7.05 o 
   2  -1  11      295.33      283.49      5.24 o 
   3  -1  11       21.87       26.88      2.18 o 
   4  -1  11        8.62        6.60      1.61 o 
   5  -1  11        2.70        0.32      1.73 o 
   6  -1  11        7.71        5.68      3.05 o 
   7  -1  11        0.02        3.11      2.42 o 
  -6   0  11        0.79        2.07      2.35 o 
  -5   0  11       13.65       13.57      2.12 o 
  -4   0  11        0.91        2.19      2.42 o 
  -3   0  11      207.32      230.19      5.10 o 
  -2   0  11        9.32        5.58      1.46 o 
  -1   0  11        0.50       -0.88      1.09 o 
   0   0  11       61.54       56.92      2.71 o 
   1   0  11      119.12      117.53      3.58 o 
   2   0  11        5.15        6.18      2.19 o 
   3   0  11        7.68        5.80      2.33 o 
   4   0  11        0.03        0.50      1.53 o 
   5   0  11        2.67        0.69      1.41 o 
   6   0  11        5.98        7.91      2.40 o 
   7   0  11        0.44       -2.05      2.14 o 
  -6   1  11        7.88        4.10      2.37 o 
  -5   1  11        0.55       -0.89      1.50 o 
  -3   1  11       60.33       69.52      3.23 o 
  -2   1  11       26.13       23.15      1.96 o 
  -1   1  11        0.92        1.45      1.23 o 
   0   1  11        1.74       -1.67      1.11 o 
   1   1  11      145.20      147.80      5.82 o 
   2   1  11       36.85       39.28      2.45 o 
   3   1  11       24.44       24.67      2.06 o 
   4   1  11       18.76       18.37      2.47 o 
   5   1  11        2.15        0.41      1.41 o 
   6   1  11        3.21       -0.02      2.85 o 
   7   1  11        6.17        6.46      2.43 o 
   8   1  11        2.74        2.22      2.52 o 
  -6   2  11        2.62        0.59      2.13 o 
  -5   2  11        6.31        6.57      1.73 o 
  -4   2  11        2.43        0.68      1.13 o 
  -3   2  11      292.95      329.21      5.92 o 
  -2   2  11       11.47        8.04      1.60 o 
  -1   2  11      102.68      107.17      3.73 o 
   0   2  11        1.23        1.62      1.21 o 
   1   2  11       83.88       90.60      3.36 o 
   2   2  11       11.22       10.89      1.62 o 
   3   2  11        7.03        8.44      3.18 o 
   4   2  11       58.70       55.40      2.93 o 
   5   2  11       23.37       24.74      2.29 o 
   6   2  11        1.88        0.62      1.90 o 
   7   2  11        0.34       -1.49      4.47 o 
   8   2  11        0.11       -0.98      3.30 o 
  -6   3  11        3.84        4.82      2.66 o 
  -5   3  11       13.88       16.47      1.98 o 
  -4   3  11      164.03      166.18      4.71 o 
  -3   3  11        1.27       -0.17      1.33 o 
  -2   3  11       48.02       43.85      2.97 o 
  -1   3  11       59.08       61.09      3.37 o 
   0   3  11       12.99       12.10      1.69 o 
   1   3  11        8.57        8.41      1.58 o 
   2   3  11        5.14        5.24      2.03 o 
   3   3  11       13.11       13.79      2.37 o 
   4   3  11        3.57        3.85      1.48 o 
   5   3  11       25.51       25.18      2.43 o 
   6   3  11        3.36        2.16      1.99 o 
   7   3  11       12.32       10.28      3.43 o 
   8   3  11        0.00       -2.13      2.20 o 
  -6   4  11       41.18       57.54      5.70 o 
  -5   4  11        1.25        0.29      1.64 o 
  -4   4  11        4.60        6.60      2.44 o 
  -3   4  11       39.55       37.75      2.59 o 
  -2   4  11        2.70        2.03      1.45 o 
  -1   4  11      415.13      413.21      6.64 o 
   0   4  11       15.42       14.47      1.88 o 
   1   4  11       35.50       44.91      3.13 o 
   2   4  11       24.29       23.94      2.27 o 
   3   4  11        3.60        2.04      1.39 o 
   4   4  11      162.26      162.57      4.32 o 
   5   4  11        9.62        8.76      2.37 o 
   6   4  11        0.71       -0.16      1.86 o 
   7   4  11        0.34        0.25      2.12 o 
   8   4  11        3.61        1.03      3.95 o 
  -6   5  11        0.30        4.54      3.11 o 
  -5   5  11        0.22       -0.16      1.83 o 
  -4   5  11        6.47       11.59      1.96 o 
  -3   5  11      169.06      174.30      4.74 o 
  -2   5  11        0.16        0.07      1.40 o 
  -1   5  11      318.57      322.01      5.98 o 
   0   5  11       18.43       16.44      1.96 o 
   1   5  11        1.15        1.25      1.48 o 
   2   5  11       90.32      102.86      3.56 o 
   3   5  11       24.55       24.00      2.17 o 
   4   5  11        2.33        0.86      1.15 o 
   5   5  11       35.81       28.94      2.40 o 
   6   5  11        0.87        0.31      1.93 o 
   7   5  11        1.13       -2.42      2.01 o 
   8   5  11        2.35        3.61      2.51 o 
  -5   6  11        2.96        0.78      1.92 o 
  -4   6  11        0.40        3.18      1.92 o 
  -3   6  11       26.05       31.30      3.16 o 
  -2   6  11        1.37        2.10      1.52 o 
  -1   6  11      984.82     1004.63     11.38 o 
   0   6  11       55.29       47.03      2.75 o 
   1   6  11       70.01       65.33      3.04 o 
   2   6  11        7.90        7.97      1.56 o 
   3   6  11      128.30      130.70      3.96 o 
   4   6  11        2.40        1.48      1.40 o 
   5   6  11        0.00        0.31      1.42 o 
   6   6  11        0.39       -2.52      1.87 o 
   7   6  11        0.16        1.10      1.96 o 
   8   6  11        2.18        6.06      3.18 o 
  -5   7  11       14.69       16.22      2.84 o 
  -4   7  11        0.46        1.39      1.97 o 
  -3   7  11       32.90       32.59      3.16 o 
  -2   7  11       38.94       39.27      3.30 o 
  -1   7  11      691.08      699.67      9.15 o 
   0   7  11       13.98       13.65      1.90 o 
   1   7  11       24.01       27.85      2.28 o 
   2   7  11       19.36       21.74      2.11 o 
   3   7  11       20.05       23.20      2.15 o 
   4   7  11        2.19        2.75      1.46 o 
   5   7  11        0.01        0.54      1.45 o 
   6   7  11        0.87       -2.34      2.01 o 
   7   7  11        1.59       -0.84      3.69 o 
  -4   8  11        4.13        3.37      2.20 o 
  -3   8  11        0.00       -1.65      1.71 o 
  -2   8  11       62.40       70.17      4.28 o 
  -1   8  11        3.48        8.87      2.15 o 
   0   8  11        0.51       -0.11      1.40 o 
   1   8  11        0.62       -0.45      1.36 o 
   2   8  11        0.16       -0.67      1.31 o 
   3   8  11        9.25        9.54      1.71 o 
   4   8  11        0.78       -0.66      1.37 o 
   5   8  11        6.65        3.55      1.59 o 
   6   8  11        0.05       -0.83      3.24 o 
   7   8  11        1.48        0.10      1.97 o 
  -4   9  11        3.24        3.06      2.24 o 
  -3   9  11        3.14        8.00      2.34 o 
  -2   9  11        5.92        4.39      1.92 o 
   0   9  11       17.41       22.17      3.56 o 
   1   9  11        0.16       -1.63      1.26 o 
   2   9  11        0.29       -1.10      1.30 o 
   3   9  11        2.72        2.09      1.43 o 
   4   9  11        2.05        3.10      1.49 o 
   5   9  11        1.60       -2.05      1.37 o 
   6   9  11        0.61        0.65      2.98 o 
   7   9  11        0.67        0.65      2.19 o 
  -3  10  11        3.76        4.02      2.11 o 
  -2  10  11        1.49        2.07      1.92 o 
  -1  10  11        1.60        2.33      1.94 o 
   0  10  11        5.50        5.16      2.06 o 
   1  10  11       28.37       28.38      2.92 o 
   2  10  11        0.77        0.16      1.68 o 
   3  10  11        0.02       -0.77      1.37 o 
   4  10  11        5.38        4.75      1.68 o 
   5  10  11        0.11       -1.28      1.50 o 
   6  10  11        2.66        2.01      2.18 o 
  -2  11  11        1.73        4.86      2.10 o 
  -1  11  11        4.52        5.05      3.05 o 
   0  11  11        5.39        5.74      2.08 o 
   1  11  11       22.38       24.10      3.24 o 
   2  11  11        2.41        2.46      3.11 o 
   3  11  11        3.88        3.01      1.90 o 
   4  11  11        1.28       -0.21      1.55 o 
   5  11  11        1.21       -0.14      1.54 o 
   6  11  11        7.67        5.60      2.45 o 
  -1  12  11        0.88        3.96      2.14 o 
   0  12  11        0.00       -0.15      1.90 o 
   1  12  11       27.06       24.87      3.02 o 
   2  12  11        4.43        5.12      2.98 o 
   3  12  11        2.85        2.28      2.05 o 
   4  12  11        0.78        0.71      1.83 o 
   5  12  11        0.08       -1.86      1.56 o 
   1  13  11        7.12        2.88      2.18 o 
   2  13  11        5.18        3.11      2.06 o 
  -2  -8  12        2.21        2.47      1.87 o 
  -1  -8  12       11.73        9.29      2.12 o 
   0  -8  12        0.28       -0.35      1.74 o 
   1  -8  12       22.59       28.37      5.10 o 
  -3  -7  12       57.89       73.04      4.05 o 
  -2  -7  12        0.12       -1.71      1.68 o 
   0  -7  12        0.31        1.60      1.76 o 
   1  -7  12       78.95      104.79      9.59 o 
   2  -7  12       14.71       25.15      3.26 o 
   3  -7  12        0.00        3.03      2.27 o 
  -4  -6  12       13.52       20.41      2.63 o 
  -3  -6  12        8.17        5.98      1.88 o 
  -2  -6  12       21.68       26.86      2.66 o 
  -1  -6  12        1.09        1.03      1.74 o 
   0  -6  12       19.33       13.28      2.16 o 
   1  -6  12       16.76       22.26      3.56 o 
   2  -6  12       45.81       42.91      3.80 o 
   3  -6  12        0.97        0.24      2.66 o 
   4  -6  12        0.90        4.88      2.13 o 
  -5  -5  12        4.66        5.70      1.99 o 
  -4  -5  12        3.23        6.38      2.00 o 
  -3  -5  12        4.17        1.44      1.69 o 
  -2  -5  12        1.99        2.67      1.70 o 
  -1  -5  12        4.28        8.46      1.90 o 
   0  -5  12        0.04        2.52      2.27 o 
   1  -5  12        3.18        3.79      2.25 o 
   2  -5  12        8.77        6.45      2.46 o 
   3  -5  12       50.95       49.33      3.89 o 
   4  -5  12        1.09        0.49      1.94 o 
   5  -5  12        1.65        0.07      1.99 o 
  -4  -4  12        0.78        0.14      2.35 o 
  -3  -4  12        5.22       11.77      2.09 o 
  -2  -4  12        0.13        0.25      1.54 o 
  -1  -4  12        0.01        3.24      2.16 o 
   0  -4  12        0.14        0.29      2.72 o 
   1  -4  12        7.20        8.31      2.52 o 
   2  -4  12       11.64       15.72      2.73 o 
   3  -4  12        4.65        6.95      2.23 o 
   4  -4  12       22.82       18.77      4.21 o 
   5  -4  12        6.77        1.91      2.12 o 
  -5  -3  12        0.23       -0.27      1.80 o 
  -4  -3  12        0.41        0.34      1.62 o 
  -3  -3  12        0.03       -1.08      1.41 o 
  -2  -3  12       14.34       16.02      2.06 o 
  -1  -3  12        1.86        1.43      2.59 o 
   0  -3  12       11.97        8.02      2.39 o 
   1  -3  12      315.31      322.73     10.04 o 
   2  -3  12       15.94       20.07      3.24 o 
   3  -3  12       58.61       54.76      4.04 o 
   4  -3  12        4.71        3.64      2.32 o 
   5  -3  12        5.93        6.40      2.34 o 
   6  -3  12       19.41       22.14      3.34 o 
  -6  -2  12        0.11        2.71      2.35 o 
  -5  -2  12        0.19        1.61      2.06 o 
  -4  -2  12        0.05       -0.39      1.46 o 
  -3  -2  12        0.21        1.07      1.39 o 
  -2  -2  12        0.01        1.26      2.03 o 
  -1  -2  12      110.73       97.48      4.83 o 
   0  -2  12       12.55       11.24      2.46 o 
   1  -2  12       11.45        8.79      2.92 o 
   2  -2  12       52.76       55.12      3.95 o 
   3  -2  12      192.22      195.44      9.07 o 
   4  -2  12        6.93        9.88      3.15 o 
   5  -2  12        0.00       -0.20      1.58 o 
   6  -2  12        2.58        1.61      2.36 o 
  -6  -1  12       15.88       21.93      3.49 o 
  -5  -1  12        8.76        4.81      2.41 o 
  -4  -1  12       46.74       44.87      4.05 o 
  -3  -1  12        3.41        0.10      2.13 o 
  -2  -1  12       25.25       24.25      3.23 o 
  -1  -1  12       10.00        8.35      5.64 o 
   0  -1  12       17.09       13.06      2.58 o 
   1  -1  12       23.29       28.94      3.21 o 
   2  -1  12        1.06        1.62      1.99 o 
   3  -1  12        2.51        2.52      2.52 o 
   4  -1  12       14.39       18.30      2.87 o 
   5  -1  12       16.86       17.77      2.75 o 
   6  -1  12        0.05       -2.99      1.99 o 
   7  -1  12        4.94        4.75      8.75 o 
  -5   0  12        0.03       -1.57      2.15 o 
  -4   0  12        8.60        2.68      2.39 o 
  -3   0  12       15.18       15.04      2.87 o 
  -2   0  12      147.21      130.49      7.65 o 
  -1   0  12      373.18      345.51     10.69 o 
   0   0  12        0.60        0.41      1.92 o 
   1   0  12       84.57       79.10      3.32 o 
   2   0  12       49.62       46.66      2.74 o 
   3   0  12      645.00      685.02     11.41 o 
   4   0  12       38.97       45.59      3.57 o 
   5   0  12        6.43        5.75      2.16 o 
   6   0  12        1.41       -0.89      2.08 o 
   7   0  12        2.26        2.35      2.47 o 
  -6   1  12        0.00       -3.50      4.41 o 
  -5   1  12       18.01       26.23      3.57 o 
  -4   1  12        1.93        2.24      4.08 o 
  -3   1  12        6.12        1.88      3.76 o 
  -2   1  12      142.91      141.96      6.04 o 
  -1   1  12        0.75        0.21      1.23 o 
   0   1  12       32.78       27.09      2.12 o 
   1   1  12        0.13        1.57      1.27 o 
   2   1  12        0.06       -0.27      1.22 o 
   3   1  12       78.15       84.32      5.79 o 
   4   1  12        7.26        5.23      1.67 o 
   5   1  12        5.93        3.45      1.68 o 
   6   1  12        1.52        0.02      2.08 o 
   7   1  12        0.06       -1.59      2.15 o 
  -6   2  12        8.99        8.04      5.44 o 
  -5   2  12        1.59       -0.98      2.32 o 
  -4   2  12        0.01       -1.12      2.12 o 
  -3   2  12        2.78        4.45      2.45 o 
  -2   2  12      455.40      465.16      7.15 o 
  -1   2  12       19.35       17.51      1.93 o 
   0   2  12        0.45       -0.31      1.16 o 
   1   2  12        9.61       12.40      2.19 o 
   2   2  12       20.43       22.25      2.06 o 
   3   2  12       19.05       20.32      3.23 o 
   4   2  12       27.04       26.02      2.31 o 
   5   2  12       22.46       19.33      3.20 o 
   6   2  12        0.35       -1.38      3.18 o 
   7   2  12        0.06       -0.66      2.10 o 
  -5   3  12        0.89        0.43      2.35 o 
  -4   3  12        0.85        3.51      2.30 o 
  -3   3  12        1.94        2.46      1.48 o 
  -2   3  12        8.86       10.58      1.76 o 
  -1   3  12        1.03        0.38      1.89 o 
   0   3  12        1.98        1.10      1.76 o 
   1   3  12        3.52        7.30      1.54 o 
   2   3  12        5.30        3.28      1.44 o 
   3   3  12        0.11       -0.97      1.28 o 
   4   3  12        5.57        1.75      1.50 o 
   5   3  12        3.68        2.89      1.61 o 
   6   3  12        0.17       -1.47      3.30 o 
   7   3  12        3.53       -3.24      3.24 o 
  -5   4  12        4.28        5.30      2.10 o 
  -4   4  12       16.58       20.72      2.40 o 
  -3   4  12       51.44       43.43      2.92 o 
  -2   4  12       54.08       51.71      3.02 o 
  -1   4  12        0.01       -2.59      1.86 o 
   0   4  12        8.68        6.79      1.55 o 
   1   4  12       37.76       42.73      2.63 o 
   2   4  12        2.65        3.68      1.48 o 
   3   4  12       31.73       28.47      2.65 o 
   4   4  12        0.07        3.92      1.54 o 
   5   4  12        2.07       -0.40      1.54 o 
   6   4  12        1.98        1.00      2.72 o 
   7   4  12        0.39        1.17      2.53 o 
  -5   5  12        3.66        3.65      2.14 o 
  -4   5  12        0.47        1.63      1.83 o 
  -3   5  12        1.71        1.87      1.94 o 
  -2   5  12        0.23       -1.36      1.39 o 
  -1   5  12        3.44        4.00      1.54 o 
   0   5  12        4.48        5.27      1.58 o 
   1   5  12      110.01      123.61      5.52 o 
   2   5  12        9.68       11.81      1.82 o 
   3   5  12        0.07        0.81      1.38 o 
   4   5  12        0.00        1.38      1.84 o 
   5   5  12       57.72       57.65      3.27 o 
   6   5  12        0.48        2.78      2.05 o 
   7   5  12        1.48       -1.20      4.28 o 
  -4   6  12        0.09       -1.55      1.83 o 
  -3   6  12       28.97       30.15      3.11 o 
  -2   6  12       65.67       58.63      3.32 o 
  -1   6  12        3.08       -0.46      1.44 o 
   0   6  12      211.74      217.99      5.11 o 
   1   6  12       14.24       16.51      2.31 o 
   2   6  12        3.46        6.21      1.77 o 
   3   6  12        0.10        0.23      1.40 o 
   4   6  12       19.26       18.74      2.17 o 
   5   6  12        0.41        0.12      1.58 o 
   6   6  12        2.86        5.12      2.27 o 
   7   6  12        0.12       -3.01      2.01 o 
  -4   7  12        0.27        1.00      1.92 o 
  -3   7  12        0.20        2.48      1.88 o 
  -2   7  12       13.75        7.04      2.18 o 
  -1   7  12        7.57        7.94      1.83 o 
   0   7  12      328.23      349.47      6.52 o 
   1   7  12      147.25      146.30      4.89 o 
   2   7  12        4.98        4.78      1.70 o 
   3   7  12        9.13        7.28      1.75 o 
   4   7  12        0.10       -1.81      1.43 o 
   5   7  12       46.95       43.05      3.27 o 
   6   7  12        4.38        3.33      2.18 o 
   7   7  12        0.09       -0.97      2.01 o 
  -4   8  12        1.17        0.67      2.07 o 
  -3   8  12       26.92       21.89      2.89 o 
  -2   8  12       13.79       17.02      2.65 o 
  -1   8  12      241.32      257.66      7.01 o 
   0   8  12      188.73      196.20      5.13 o 
   1   8  12       31.23       37.99      2.76 o 
   2   8  12       36.57       42.20      2.89 o 
   3   8  12        6.35        5.06      2.20 o 
   4   8  12        8.73        7.34      1.82 o 
   5   8  12        5.98        5.31      1.76 o 
   6   8  12        0.00       -3.10      3.18 o 
   7   8  12        0.31       -3.09      2.06 o 
  -3   9  12        1.61        1.88      2.02 o 
  -2   9  12       19.24       21.75      2.93 o 
  -1   9  12       20.86       21.09      5.51 o 
   0   9  12      134.73      151.94      8.62 o 
   1   9  12        3.96        3.86      2.01 o 
   2   9  12        0.86        1.11      1.94 o 
   3   9  12        0.22       -2.11      1.41 o 
   4   9  12        6.97        6.08      1.77 o 
   5   9  12        0.20       -1.39      1.50 o 
   6   9  12        0.53        0.21      2.27 o 
  -2  10  12        0.81       -0.85      1.86 o 
  -1  10  12       52.44       49.92      4.07 o 
   0  10  12       10.21        6.57      2.85 o 
   1  10  12       23.64       24.14      3.11 o 
   2  10  12        0.59        1.44      1.81 o 
   3  10  12        0.52       -0.37      1.52 o 
   4  10  12        2.23        0.89      1.63 o 
   5  10  12        0.25       -1.45      1.52 o 
   6  10  12        1.07       -2.40      2.46 o 
  -1  11  12       20.28       22.16      5.57 o 
   0  11  12       38.52       41.69      4.28 o 
   1  11  12        3.68        6.53      2.10 o 
   2  11  12        0.15        1.78      2.07 o 
   3  11  12        0.35       -2.41      1.61 o 
   4  11  12        0.03       -0.68      1.65 o 
   5  11  12        0.00       -0.85      2.16 o 
   1  12  12        5.47        3.45      2.08 o 
   2  12  12        0.09        1.61      2.02 o 
   3  12  12        0.08        0.55      1.96 o 
   0  -7  13       38.77       28.58      5.31 o 
  -2  -6  13        0.69        3.29      5.83 o 
   0  -6  13        0.01       -1.11      2.11 o 
   1  -6  13        8.03       11.34      3.05 o 
  -3  -5  13        8.38       13.00      3.08 o 
  -2  -5  13        7.06       10.06      5.90 o 
  -1  -5  13        0.00       -1.58      2.40 o 
   0  -5  13       22.73       23.76      3.28 o 
   1  -5  13        0.01        0.75      2.92 o 
   2  -5  13        0.01        2.59      2.11 o 
   3  -5  13        6.11        6.23      2.52 o 
  -4  -4  13       12.09       17.70      3.30 o 
  -3  -4  13        1.94        4.68      2.61 o 
  -2  -4  13        2.89        0.45      2.05 o 
  -1  -4  13        3.84        2.74      5.18 o 
   0  -4  13        0.51       -0.85      2.03 o 
   1  -4  13       23.86       23.59      4.54 o 
   2  -4  13        0.01       -0.82      2.01 o 
   3  -4  13        0.44       -0.08      1.99 o 
   4  -4  13        3.55        4.50      2.98 o 
  -4  -3  13        0.44        1.83      2.41 o 
  -3  -3  13        0.12       -2.47      2.05 o 
  -2  -3  13        0.04        2.35      2.23 o 
  -1  -3  13        0.05        2.03      4.54 o 
   0  -3  13        0.01       -2.46      1.99 o 
   1  -3  13        2.23       -0.05      2.53 o 
   2  -3  13        3.29        3.69      2.27 o 
   3  -3  13        2.42        1.60      2.59 o 
   4  -3  13        0.44        1.26      2.18 o 
   5  -3  13       10.13       10.91      2.62 o 
  -5  -2  13        0.26       -0.39      2.41 o 
  -4  -2  13       16.71       11.85      2.88 o 
  -3  -2  13        0.04       -0.89      2.33 o 
  -2  -2  13        3.58       -0.53      3.69 o 
  -1  -2  13        5.48        3.85      2.85 o 
   0  -2  13        0.16        0.99      2.25 o 
   1  -2  13       31.13       26.90      3.26 o 
   2  -2  13       39.00       38.02      4.60 o 
   3  -2  13       31.11       32.53      3.52 o 
   4  -2  13        0.42        2.37      2.08 o 
   5  -2  13       60.84       57.75      4.33 o 
  -5  -1  13        2.67        3.45      2.63 o 
  -4  -1  13        0.02       -0.71      2.85 o 
  -3  -1  13        2.66        2.88      2.39 o 
  -2  -1  13        0.08        1.73      2.92 o 
  -1  -1  13       15.64       13.03      2.80 o 
   0  -1  13        1.72        2.72      2.20 o 
   1  -1  13       41.91       41.97      3.77 o 
   2  -1  13       51.68       45.42      3.80 o 
   3  -1  13       12.17        9.52      2.45 o 
   4  -1  13      332.70      346.96      8.35 o 
   5  -1  13       12.89       14.86      2.27 o 
   6  -1  13        5.85        8.64      4.15 o 
  -5   0  13        1.30        4.43      3.89 o 
  -4   0  13        3.11        4.06      2.63 o 
  -3   0  13       21.71       23.79      7.45 o 
  -2   0  13       23.14       15.23      3.95 o 
  -1   0  13        3.45        0.34      3.69 o 
   0   0  13       71.58       70.59      9.91 o 
   1   0  13        0.37        0.60      3.37 o 
   2   0  13      135.33      140.26      5.48 o 
   3   0  13        5.25        4.19      1.65 o 
   4   0  13       56.37       66.18      4.38 o 
   5   0  13      126.11      136.31      4.40 o 
   6   0  13        0.74       -2.92      2.06 o 
  -5   1  13        5.80        3.24      4.99 o 
  -4   1  13        6.82        9.84      2.92 o 
  -3   1  13        7.45        4.47      2.53 o 
  -2   1  13        6.07        7.56      2.61 o 
  -1   1  13      296.49      266.07     10.50 o 
   0   1  13        5.22        5.99      2.39 o 
   1   1  13       34.67       33.48      3.41 o 
   2   1  13       13.84       15.35      1.93 o 
   3   1  13      146.61      163.82      5.35 o 
   4   1  13      106.57      106.63      4.03 o 
   5   1  13        0.11        3.12      1.70 o 
   6   1  13        2.66        0.90      3.05 o 
  -5   2  13        0.36       -1.16      2.58 o 
  -4   2  13        1.19       -0.49      6.16 o 
  -3   2  13       21.31       17.88      8.04 o 
  -2   2  13        6.42        8.01      3.18 o 
  -1   2  13       90.69       97.19      5.20 o 
   0   2  13        0.75        1.90      1.36 o 
   1   2  13        0.02       -1.24      1.85 o 
   2   2  13       12.41        9.57      1.82 o 
   3   2  13       67.83       82.18      3.59 o 
   4   2  13        4.67        4.77      1.84 o 
   5   2  13        6.12        6.02      1.94 o 
   6   2  13        0.01        1.02      2.24 o 
  -5   3  13        6.67        8.01      3.04 o 
  -4   3  13       14.62       13.01      4.47 o 
  -3   3  13        1.27       -0.09      2.66 o 
  -2   3  13        0.97        0.05      1.38 o 
  -1   3  13       35.78       46.97      2.99 o 
   0   3  13        8.91       11.50      1.89 o 
   1   3  13        0.00       -0.23      1.32 o 
   2   3  13        0.01        1.92      1.44 o 
   3   3  13       54.14       51.68      3.10 o 
   4   3  13        5.57        8.57      2.02 o 
   5   3  13        8.55        9.10      1.98 o 
   6   3  13        6.12        6.32      2.58 o 
   7   3  13        0.03       -3.21      2.14 o 
  -4   4  13        0.00       -3.02      2.18 o 
  -3   4  13        8.29        7.54      1.86 o 
  -2   4  13        0.35        0.47      1.81 o 
  -1   4  13      126.89      142.58      5.32 o 
   0   4  13       17.38       16.16      2.02 o 
   1   4  13       48.33       52.37      3.03 o 
   2   4  13        0.01       -0.52      1.36 o 
   3   4  13       25.71       27.63      2.45 o 
   4   4  13        5.86        5.85      1.79 o 
   5   4  13        6.79        7.48      2.48 o 
   6   4  13        4.41        6.29      2.52 o 
   7   4  13        4.10        3.22      2.52 o 
  -4   5  13       12.63       12.50      2.47 o 
  -3   5  13        3.29        1.94      1.62 o 
  -2   5  13       71.10       70.56      3.67 o 
  -1   5  13        9.37       12.29      1.93 o 
   0   5  13        1.54        0.24      1.41 o 
   1   5  13       46.50       47.85      3.02 o 
   2   5  13        0.27       -0.27      1.42 o 
   3   5  13        0.95       -1.26      1.64 o 
   4   5  13        0.00        0.45      1.54 o 
   5   5  13        0.28       -0.96      1.64 o 
   6   5  13        1.08        1.69      2.12 o 
  -4   6  13       19.40       19.60      4.08 o 
  -3   6  13        4.13        2.45      2.27 o 
  -2   6  13        2.61        1.44      1.54 o 
  -1   6  13       12.18       10.94      1.92 o 
   0   6  13        4.92        3.53      3.23 o 
   1   6  13      137.01      135.12      4.33 o 
   2   6  13        2.15        0.81      1.54 o 
   3   6  13        5.46        6.22      1.77 o 
   4   6  13        4.73        3.51      1.75 o 
   5   6  13        0.39        0.44      1.57 o 
   6   6  13       19.11       16.45      3.01 o 
  -3   7  13        1.23        2.16      1.93 o 
  -2   7  13        4.12        2.59      1.92 o 
  -1   7  13       80.64       81.41      3.80 o 
   0   7  13        2.78        0.85      1.82 o 
   1   7  13      129.68      155.11      4.77 o 
   2   7  13       35.95       36.63      3.43 o 
   3   7  13        0.11       -0.76      1.47 o 
   4   7  13       19.10       23.78      2.41 o 
   5   7  13        3.92        4.13      1.78 o 
   6   7  13        0.62        0.13      3.05 o 
  -3   8  13        7.75       10.39      2.52 o 
  -2   8  13        1.66        2.77      1.97 o 
  -1   8  13       23.23       27.43      3.15 o 
   0   8  13        0.16        2.86      1.62 o 
   1   8  13      341.61      368.63      8.87 o 
   2   8  13        8.18        5.93      1.87 o 
   3   8  13       20.42       21.45      2.41 o 
   4   8  13        3.86        3.46      1.72 o 
   5   8  13       13.11       11.26      2.12 o 
   6   8  13        0.70        0.29      2.20 o 
  -2   9  13        1.03       -0.17      4.47 o 
  -1   9  13       16.74       20.11      3.50 o 
   0   9  13       16.30       14.34      4.67 o 
   1   9  13      108.26      107.01      4.95 o 
   2   9  13        7.09        7.09      2.82 o 
   3   9  13        8.14        9.46      2.00 o 
   4   9  13        2.80        2.94      1.72 o 
   5   9  13        3.13       -0.29      1.71 o 
  -1  10  13        1.37        2.14      3.56 o 
   0  10  13       20.24       19.63      2.97 o 
   1  10  13        0.17       -0.56      1.94 o 
   2  10  13        0.53       -1.60      1.92 o 
   3  10  13        0.92       -0.79      1.60 o 
   4  10  13        0.01       -0.30      1.64 o 
   2  11  13        5.02        6.54      2.30 o 
   3  11  13        0.01       -0.32      2.40 o 
  -1  -5  14       48.97       56.29      4.76 o 
   0  -5  14        0.16        0.10      2.33 o 
   1  -5  14        1.57        6.50      3.37 o 
  -2  -4  14        6.74        5.37      2.78 o 
  -1  -4  14        3.22       -0.04      2.18 o 
   0  -4  14       17.73       19.77      3.14 o 
   1  -4  14        3.76        2.62      2.30 o 
   2  -4  14        8.78        5.21      2.45 o 
   3  -4  14       14.22       14.71      4.47 o 
  -3  -3  14        6.17        7.40      2.78 o 
  -2  -3  14        5.65        5.50      2.57 o 
  -1  -3  14        3.57        1.99      3.37 o 
   0  -3  14        4.39        8.66      2.61 o 
   1  -3  14        0.49        4.47      2.30 o 
   2  -3  14        0.35       -0.15      1.99 o 
   3  -3  14        5.16        9.16      2.46 o 
   4  -3  14       10.62       12.34      2.83 o 
  -2  -2  14        0.04       -1.50      7.52 o 
  -1  -2  14        7.18        6.97      2.45 o 
   0  -2  14        0.43       -0.12      2.08 o 
   1  -2  14        0.64       -1.77      2.11 o 
   2  -2  14        0.90        4.74      2.66 o 
   3  -2  14        9.62       12.19      2.65 o 
   4  -2  14        2.02        2.64      2.24 o 
  -4  -1  14        1.73       -1.58      2.45 o 
  -3  -1  14        0.08        0.76      2.51 o 
  -2  -1  14        0.45       -1.96      2.05 o 
  -1  -1  14        0.02       -0.27      4.92 o 
   0  -1  14        7.31        4.57      2.49 o 
   1  -1  14        1.32        3.11      3.24 o 
   2  -1  14        3.51       -0.17      2.33 o 
   3  -1  14      124.77      122.71      6.29 o 
   4  -1  14        5.97        4.99      2.46 o 
   5  -1  14       14.46       16.78      3.02 o 
  -4   0  14        3.16        0.87      2.67 o 
  -3   0  14        0.47        2.56      2.47 o 
  -2   0  14        1.48        1.80      2.35 o 
  -1   0  14        0.00        1.14      2.24 o 
   0   0  14        0.02        0.76      2.34 o 
   1   0  14       40.21       32.57      4.34 o 
   2   0  14        7.99        7.91      2.51 o 
   3   0  14        1.28       -0.39      2.10 o 
   4   0  14        9.42        9.02      2.64 o 
   5   0  14       39.16       46.03      3.17 o 
  -4   1  14        1.30        0.40      2.68 o 
  -3   1  14        3.96        0.19      2.49 o 
  -2   1  14       36.66       33.86      5.51 o 
  -1   1  14        2.13        2.88      2.27 o 
   0   1  14       10.92        6.99      3.37 o 
   1   1  14       19.47       16.13      2.89 o 
   2   1  14        7.19        5.92      2.56 o 
   3   1  14       14.20       15.94      2.15 o 
   4   1  14        1.13        4.68      1.76 o 
   5   1  14        3.31        3.70      1.91 o 
  -3   2  14        2.55        3.26      2.61 o 
  -2   2  14        1.31       -0.56      2.40 o 
  -1   2  14        6.54        2.06      2.52 o 
   0   2  14       69.21       67.11      4.85 o 
   1   2  14       88.68       92.04      3.88 o 
   2   2  14        0.59       -0.24      1.52 o 
   3   2  14       11.59       13.45      3.37 o 
   4   2  14        9.94       12.13      2.09 o 
   5   2  14      106.49      127.73      6.46 o 
   6   2  14        6.62        5.61      4.21 o 
  -4   3  14        0.27        1.07      2.65 o 
  -3   3  14        8.24       10.95      2.99 o 
  -2   3  14        1.56        2.85      2.35 o 
  -1   3  14        6.52       12.76      2.83 o 
   0   3  14       48.02       50.41      4.46 o 
   1   3  14        1.31       -0.34      1.51 o 
   2   3  14       17.76       19.15      2.19 o 
   3   3  14        2.16        1.38      1.88 o 
   4   3  14        0.00       -1.19      1.57 o 
   5   3  14       21.89       22.29      2.60 o 
   6   3  14        4.49        6.47      2.67 o 
  -4   4  14       10.66        8.88      2.95 o 
  -3   4  14        1.95       -3.18      6.42 o 
  -2   4  14        0.48        1.67      1.98 o 
  -1   4  14        6.91        6.96      1.75 o 
   0   4  14      157.26      174.88      4.99 o 
   1   4  14       15.03       14.64      2.78 o 
   2   4  14        0.86        2.73      1.62 o 
   3   4  14        8.78       11.73      3.47 o 
   4   4  14        4.76        8.03      1.94 o 
   5   4  14       13.17       11.60      2.19 o 
   6   4  14        9.37       10.29      2.96 o 
  -3   5  14        3.54        0.66      1.60 o 
  -2   5  14        0.80        3.54      2.24 o 
  -1   5  14        3.27        4.48      1.74 o 
   0   5  14       16.70       20.13      2.36 o 
   1   5  14        0.85       -0.58      1.50 o 
   2   5  14        2.29        4.33      1.64 o 
   3   5  14        1.14        3.75      1.77 o 
   4   5  14        2.99        2.69      1.75 o 
   5   5  14        1.60        4.22      1.91 o 
   6   5  14        0.02       -0.06      2.08 o 
  -3   6  14        0.01       -0.28      2.20 o 
  -2   6  14        5.66        8.73      3.28 o 
  -1   6  14       24.97       23.64      2.49 o 
   0   6  14       18.63       14.74      2.15 o 
   1   6  14        0.03       -1.17      1.58 o 
   2   6  14        0.99        1.53      1.67 o 
   3   6  14       14.14       15.13      2.22 o 
   4   6  14        3.91        4.08      1.81 o 
   5   6  14        2.69        0.87      1.76 o 
  -2   7  14        0.02       -1.13      1.87 o 
  -1   7  14        1.35       -0.70      1.55 o 
   0   7  14        0.09       -2.26      1.50 o 
   1   7  14        0.02        0.07      1.65 o 
   2   7  14        0.71        0.08      2.07 o 
   3   7  14       23.56       26.32      2.66 o 
   4   7  14        1.92       -0.85      1.65 o 
   5   7  14        0.20       -2.16      1.64 o 
  -2   8  14        0.01        0.73      1.96 o 
  -1   8  14        6.07        2.79      2.15 o 
   0   8  14       25.42       20.53      3.01 o 
   1   8  14        5.28        8.33      2.01 o 
   2   8  14       30.84       34.77      4.22 o 
   3   8  14        4.44        3.81      1.92 o 
   4   8  14        0.08       -3.09      2.06 o 
   5   8  14        0.09       -0.26      1.75 o 
  -1   9  14        0.02       -0.84      1.86 o 
   0   9  14        1.67        1.05      1.93 o 
   1   9  14        3.74        2.67      2.18 o 
   2   9  14       65.23       70.36      3.86 o 
   3   9  14       23.23       24.49      3.94 o 
   4   9  14        0.45        1.63      1.77 o 
   1  10  14       72.11       81.34      6.35 o 
   2  10  14       35.58       38.97      3.80 o 
  -1  -3  15       11.04       18.06      3.24 o 
   0  -3  15        2.53        2.57      2.33 o 
   1  -3  15        1.21       -1.50      2.27 o 
  -2  -2  15       19.84       26.15      3.70 o 
  -1  -2  15        1.09        1.72      2.54 o 
   0  -2  15        0.27       -0.04      2.12 o 
   1  -2  15        1.44       -0.48      2.13 o 
   2  -2  15        0.91        2.16      2.34 o 
   3  -2  15        7.76        9.25      3.82 o 
  -2  -1  15        1.62       -1.18      2.30 o 
  -1  -1  15        0.01        0.53      2.23 o 
   0  -1  15        0.37       -2.55      3.76 o 
   1  -1  15        0.13       -2.39      1.84 o 
   2  -1  15        1.15        1.48      2.05 o 
   3  -1  15        2.39        6.50      2.49 o 
  -2   0  15        8.73        9.14      2.96 o 
  -1   0  15        0.36       -0.15      2.39 o 
   0   0  15        1.92       -2.71      2.11 o 
   1   0  15        4.63        5.61      3.76 o 
   2   0  15        0.01        1.50      2.12 o 
   3   0  15        9.98        4.43      2.34 o 
   4   0  15        6.06        6.36      2.55 o 
  -3   1  15        5.55        4.99      2.89 o 
  -2   1  15        0.06        0.80      5.51 o 
  -1   1  15        1.35        2.77      2.55 o 
   0   1  15        0.49       -3.32      2.21 o 
   1   1  15       10.85       10.98      5.05 o 
   2   1  15        0.08        4.54      3.43 o 
   3   1  15       19.33       21.20      3.11 o 
   4   1  15       11.73       14.94      2.92 o 
  -3   2  15        2.06        3.62      2.96 o 
  -2   2  15        3.71        6.73      2.72 o 
  -1   2  15       10.23       13.95      4.47 o 
   0   2  15        6.30        3.38      2.46 o 
   1   2  15        4.84        6.85      2.62 o 
   2   2  15       33.63       33.63      3.89 o 
   3   2  15        0.10        3.61      2.32 o 
   4   2  15       44.05       46.06      6.49 o 
  -2   3  15        1.42       -0.62      2.43 o 
  -1   3  15        7.43        9.37      2.83 o 
   0   3  15        0.87       -1.91      2.20 o 
   1   3  15      129.49      140.90      6.07 o 
   2   3  15        0.07        1.84      1.66 o 
   3   3  15       12.73       17.33      2.56 o 
   4   3  15       11.42       11.95      2.29 o 
  -2   4  15        0.25       -1.22      3.43 o 
  -1   4  15       10.89        8.61      3.30 o 
   0   4  15        6.15        8.51      1.93 o 
   1   4  15       17.83       21.01      2.45 o 
   2   4  15        4.59        4.52      1.80 o 
   3   4  15        0.02        1.91      1.71 o 
   4   4  15        0.73        1.05      1.88 o 
  -2   5  15        8.65       10.43      2.96 o 
  -1   5  15        2.99        5.55      1.89 o 
   0   5  15        3.45        2.21      1.67 o 
   1   5  15       14.63       17.34      2.30 o 
   2   5  15        1.38        1.52      1.71 o 
   3   5  15        2.17        1.64      1.76 o 
   4   5  15        0.27        1.07      1.83 o 
  -1   6  15        5.93        5.53      3.03 o 
   0   6  15        0.01       -2.22      1.59 o 
   1   6  15       23.95       28.94      2.77 o 
   2   6  15        8.60        9.65      2.16 o 
   3   6  15       11.31       11.12      2.23 o 
   4   6  15        0.43       -0.04      1.75 o 
  -1   7  15        0.03       -1.36      1.77 o 
   0   7  15       13.61       17.69      4.14 o 
   1   7  15        4.98        8.76      2.28 o 
   2   7  15        1.09        0.93      1.82 o 
   3   7  15       17.91       20.45      2.57 o 
   4   7  15        0.80        0.38      1.51 o 
   1   8  15        1.27       -0.22      2.65 o 
   2   8  15        3.23        0.90      1.73 o 
   3   8  15       37.11       31.71      3.40 o 
   0   0  16        0.01        0.28      3.82 o 
   1   0  16        4.10        6.08      2.77 o 
   0   1  16        0.13       -2.59      2.43 o 
   1   1  16        0.02       -2.46      2.34 o 
   2   1  16        0.88       -2.51      2.24 o 
   0   2  16        1.82        4.29      3.89 o 
   1   2  16        0.00       -2.03      2.53 o 
   2   2  16        0.01       -0.67      4.21 o 
   0   3  16       15.16        9.17      2.97 o 
   1   3  16        0.20       -3.60      4.28 o 
   2   3  16        1.97        0.62      3.82 o 
   3   3  16        6.43        7.00      2.75 o 
   0   4  16        0.13        0.96      4.99 o 
   1   4  16        1.82        0.25      2.42 o 
   2   4  16       14.37       12.20      2.78 o 
   1   5  16        3.63        4.04      2.47 o 
   2   5  16        9.93       11.69      2.29 o 
                                                 
