# Supplementary material for: N⋯π and O⋯π interactions rather than “directed” hydrogen bonding in the crystal packing of ethyl (Z)-2-cyano-3-[(4-alkoxyphenyl)amino]prop-2-enoates
Source: Royal Society of Chemistry journal article supplement (doi:10.1039/c1ce05199g), 2011-01-01
Supplement: c1ce05199g_2.fcf [file c1ce05199g_2.fcf]

# 
# h,k,l, Fc-squared, Fo-squared, sigma(Fo-squared) and status flag 
# 
data_a 
_shelx_title ' A in P-1' 
_shelx_refln_list_code          4 
_shelx_F_calc_maximum      127.06 
_exptl_crystal_F_000       260.00 
_reflns_d_resolution_high  0.8256 
 
loop_ 
 _symmetry_equiv_pos_as_xyz 
 'x, y, z' 
 '-x, -y, -z' 
 
_cell_length_a     4.4026 
_cell_length_b    10.6671 
_cell_length_c    13.8234 
_cell_angle_alpha  76.294 
_cell_angle_beta   86.681 
_cell_angle_gamma  89.165 
 
_shelx_F_squared_multiplier     1.000 
 
loop_ 
 _refln_index_h 
 _refln_index_k 
 _refln_index_l 
 _refln_F_squared_calc 
 _refln_F_squared_meas 
 _refln_F_squared_sigma 
 _refln_observed_status 
   1   0   0     1732.15     1662.36     10.74 o 
   2   0   0       55.84       48.22      0.99 o 
   3   0   0       26.37       27.05      1.42 o 
   4   0   0        7.45        8.27      1.15 o 
   5   0   0        0.06        3.06      1.61 o 
  -5   1   0        4.96        5.93      2.07 o 
  -4   1   0       29.17       29.99      1.61 o 
  -3   1   0        4.45        4.31      0.84 o 
  -2   1   0       29.11       24.02      0.72 o 
  -1   1   0       17.07       20.10      0.98 o 
   1   1   0        9.07        8.55      0.41 o 
   2   1   0        4.75        4.68      0.47 o 
   3   1   0      241.10      258.71      2.97 o 
   4   1   0       15.47       19.24      2.23 o 
   5   1   0        0.10        1.12      1.78 o 
  -5   2   0        2.89        3.31      1.36 o 
  -4   2   0        6.63        6.39      1.17 o 
  -3   2   0       14.81       18.92      1.25 o 
  -2   2   0      302.47      276.71      2.52 o 
  -1   2   0    14319.43    13180.37     94.12 o 
   0   2   0      385.35      452.99      5.27 o 
   1   2   0      149.88      161.25      2.47 o 
   2   2   0      267.56      261.50      2.56 o 
   3   2   0       16.22       18.93      1.11 o 
   4   2   0        0.22       -0.48      1.40 o 
   5   2   0        1.66        2.62      2.08 o 
  -5   3   0        2.11        2.39      3.18 o 
  -4   3   0        0.02        0.83      0.90 o 
  -3   3   0        0.29        1.24      0.79 o 
  -2   3   0      144.74      138.07      2.37 o 
  -1   3   0      351.02      347.50      4.20 o 
   0   3   0       37.35       44.60      1.10 o 
   1   3   0      419.68      464.15      3.99 o 
   2   3   0     1058.64     1115.85      7.75 o 
   3   3   0        6.15        6.65      0.78 o 
   4   3   0        0.39        0.99      1.63 o 
   5   3   0        5.59        6.79      2.38 o 
  -5   4   0        1.77        1.15      1.22 o 
  -4   4   0        0.26        0.63      0.88 o 
  -3   4   0       59.56       59.22      2.79 o 
  -2   4   0      948.22      888.63     10.77 o 
  -1   4   0       51.72       48.57      0.96 o 
   1   4   0      298.98      275.45      2.59 o 
   2   4   0      133.26      133.75      1.83 o 
   3   4   0        8.87       10.04      1.15 o 
   4   4   0        0.01       -1.13      1.02 o 
   5   4   0        1.55        1.59      2.20 o 
  -4   5   0        0.23        1.77      1.01 o 
  -3   5   0       10.29        8.39      1.12 o 
  -2   5   0        1.14        3.06      0.80 o 
  -1   5   0      405.86      387.20      3.44 o 
   0   5   0       95.33      103.16      1.51 o 
   1   5   0     1087.28     1177.19      8.15 o 
   2   5   0        5.58        7.41      0.67 o 
   3   5   0        0.93        1.67      0.94 o 
   4   5   0       10.10       10.31      1.52 o 
  -4   6   0        5.51        7.94      3.29 o 
  -3   6   0       70.05       66.94      2.23 o 
  -2   6   0        5.84        5.50      0.92 o 
  -1   6   0       17.03       19.91      0.89 o 
   1   6   0        0.91        0.48      0.49 o 
   2   6   0      118.86      115.85      2.53 o 
   3   6   0       25.10       24.49      1.50 o 
   4   6   0        0.33        0.36      1.75 o 
  -4   7   0        0.04       -1.06      1.11 o 
  -3   7   0        0.13        0.59      1.26 o 
  -2   7   0      138.97      123.82      2.71 o 
  -1   7   0       16.83       17.19      0.95 o 
   0   7   0       13.85       14.83      0.87 o 
   1   7   0       13.18       15.65      0.94 o 
   2   7   0        4.88        4.50      1.12 o 
   3   7   0        5.69        5.37      2.86 o 
   4   7   0        0.02       -0.36      1.12 o 
  -4   8   0        3.81        3.55      1.68 o 
  -3   8   0        0.81        0.10      1.04 o 
  -2   8   0        5.20        5.59      1.24 o 
  -1   8   0       12.76       14.52      1.20 o 
   0   8   0        0.12       -0.90      0.60 o 
   1   8   0      266.49      280.78      3.34 o 
   2   8   0       25.26       25.67      1.55 o 
   3   8   0        0.68        0.52      0.97 o 
   4   8   0        0.00       -2.50      1.67 o 
  -3   9   0       20.88       19.36      1.76 o 
  -2   9   0        0.88        1.10      1.18 o 
  -1   9   0        0.21        0.68      0.80 o 
   0   9   0      121.84      123.34      2.22 o 
   1   9   0       38.80       39.52      1.87 o 
   2   9   0        1.59        0.06      1.53 o 
   3   9   0        1.49       -0.51      1.56 o 
  -3  10   0        3.46        1.51      1.27 o 
  -2  10   0        2.31        1.35      1.08 o 
  -1  10   0       15.08       14.93      1.38 o 
   0  10   0      323.75      338.34      4.04 o 
   1  10   0       25.16       26.85      2.80 o 
   2  10   0        0.70        2.53      1.71 o 
   3  10   0        0.00        2.30      1.80 o 
  -2  11   0        0.14        0.28      1.65 o 
  -1  11   0       40.01       40.66      2.68 o 
   0  11   0        7.78        9.60      2.02 o 
   1  11   0        0.58       -0.56      1.64 o 
   2  11   0        0.53       -0.19      1.74 o 
  -1  12   0       86.13       83.53      3.87 o 
   1  12   0        4.27        1.89      1.81 o 
  -1 -12   1        1.22        0.62      1.87 o 
   1 -12   1        0.00        2.53      1.72 o 
  -2 -11   1        0.90        2.71      2.02 o 
  -1 -11   1        0.05        1.96      1.77 o 
   1 -11   1       17.96       24.01      2.62 o 
   2 -11   1        0.00        1.33      1.21 o 
  -3 -10   1        5.67        5.63      2.29 o 
  -2 -10   1        2.12        3.08      1.77 o 
  -1 -10   1       12.00        8.52      1.54 o 
   0 -10   1        2.41        2.17      0.85 o 
   1 -10   1        1.03        1.54      0.93 o 
   2 -10   1        0.13       -0.44      0.99 o 
   3 -10   1        0.58        2.01      1.31 o 
  -3  -9   1        0.12        0.98      1.56 o 
  -2  -9   1        0.78        1.04      0.95 o 
  -1  -9   1        5.47        6.45      1.20 o 
   0  -9   1       16.25       18.88      1.13 o 
   1  -9   1       22.51       21.12      1.41 o 
   2  -9   1        0.91        0.40      1.29 o 
   3  -9   1        0.02        1.20      1.19 o 
  -4  -8   1        1.12        2.05      1.35 o 
  -3  -8   1        0.89        0.52      1.02 o 
  -2  -8   1       21.09       19.23      1.44 o 
  -1  -8   1       37.79       39.51      1.76 o 
   0  -8   1       23.58       28.00      1.19 o 
   1  -8   1        0.93       -0.69      0.76 o 
   2  -8   1       13.49       13.00      1.32 o 
   3  -8   1        1.71        1.65      1.12 o 
   4  -8   1        1.39        2.11      1.30 o 
  -4  -7   1        0.24        0.59      1.25 o 
  -3  -7   1        6.66        4.37      1.13 o 
  -2  -7   1       82.68       82.62      2.33 o 
  -1  -7   1       35.32       33.92      1.17 o 
   0  -7   1      107.35      123.81      1.98 o 
   1  -7   1        9.94       11.67      0.90 o 
   2  -7   1        7.78        8.57      1.59 o 
   3  -7   1        8.93       11.44      1.55 o 
   4  -7   1        2.09        2.58      1.34 o 
  -4  -6   1        0.00       -1.41      1.08 o 
  -3  -6   1       31.40       28.15      1.62 o 
  -2  -6   1       49.73       52.06      1.86 o 
  -1  -6   1       73.17       78.80      1.50 o 
   0  -6   1      261.38      278.78      2.95 o 
   1  -6   1        5.56        3.83      0.61 o 
   2  -6   1        4.47        4.98      0.95 o 
   3  -6   1       14.44       13.26      1.43 o 
   4  -6   1        2.90        1.58      1.15 o 
  -4  -5   1       14.00       13.25      1.61 o 
  -3  -5   1        9.99        8.29      1.16 o 
  -2  -5   1        3.05        2.95      0.77 o 
   0  -5   1       63.14       63.92      1.22 o 
   1  -5   1        1.12        1.97      0.47 o 
   2  -5   1       53.72       58.88      1.77 o 
   3  -5   1       13.84       12.10      1.31 o 
   4  -5   1        1.59        1.37      1.02 o 
  -4  -4   1       10.02       10.42      1.50 o 
  -3  -4   1        9.14       12.30      1.26 o 
  -2  -4   1        0.93        0.28      0.45 o 
  -1  -4   1      571.47      620.52      6.66 o 
   0  -4   1       12.10       12.14      0.60 o 
   1  -4   1       34.12       31.05      0.82 o 
   2  -4   1      144.66      145.97      2.69 o 
   3  -4   1       14.80       16.17      1.28 o 
   4  -4   1        1.07        2.20      1.02 o 
   5  -4   1        0.25       -0.61      1.96 o 
  -5  -3   1        7.75        6.26      2.45 o 
  -4  -3   1        0.03       -0.47      1.04 o 
  -3  -3   1        1.01        0.45      1.35 o 
  -2  -3   1      164.09      172.93      2.01 o 
  -1  -3   1       19.21       16.88      0.76 o 
   0  -3   1      735.82      841.66      8.50 o 
   1  -3   1        1.78        1.50      0.54 o 
   2  -3   1        0.10        0.34      0.67 o 
   3  -3   1        4.35        2.01      0.82 o 
   4  -3   1        0.44        0.80      0.87 o 
   5  -3   1        0.53        0.78      1.19 o 
  -5  -2   1        4.64        6.56      2.30 o 
  -4  -2   1        0.59       -1.13      0.96 o 
  -3  -2   1       12.64       14.58      0.93 o 
  -2  -2   1      440.36      454.69      3.75 o 
  -1  -2   1      408.03      398.71      3.53 o 
   0  -2   1       72.38       79.18      0.93 o 
   1  -2   1      285.53      290.65      3.09 o 
   2  -2   1      169.44      154.53      2.45 o 
   3  -2   1        0.46        0.08      0.77 o 
   4  -2   1        0.16       -1.23      0.82 o 
   5  -2   1        2.87        2.85      1.27 o 
  -5  -1   1        0.94       -0.07      1.96 o 
  -4  -1   1        1.07       -0.09      1.34 o 
  -3  -1   1      117.84      120.67      1.96 o 
  -2  -1   1       94.60       96.98      1.39 o 
  -1  -1   1        8.73       10.59      0.53 o 
   0  -1   1      143.74      147.44      2.13 o 
   1  -1   1     1432.93     1319.70     27.55 o 
   2  -1   1       68.29       62.72      1.05 o 
   3  -1   1        4.12        4.43      0.88 o 
   4  -1   1        2.66        3.03      0.95 o 
   5  -1   1        0.14        0.34      1.16 o 
  -5   0   1        1.52        1.13      1.89 o 
  -4   0   1        0.63        0.70      1.58 o 
  -3   0   1       97.73      102.64      1.80 o 
  -2   0   1        9.64       10.09      0.56 o 
  -1   0   1      346.10      320.32      3.07 o 
   2   0   1       77.03       75.32      1.21 o 
   3   0   1        2.54        1.51      1.56 o 
   4   0   1       10.36        6.69      1.58 o 
  -5   1   1        1.75        3.03      1.84 o 
  -4   1   1       20.53       20.24      1.47 o 
  -3   1   1       13.11       13.55      0.89 o 
  -2   1   1        7.67        6.67      0.53 o 
  -1   1   1       69.96       63.59      0.91 o 
   2   1   1      331.19      321.50      2.90 o 
   3   1   1        2.45        5.03      0.77 o 
   4   1   1        0.25        0.57      0.85 o 
   5   1   1        2.47        5.69      1.75 o 
  -5   2   1        0.07        0.24      1.77 o 
  -4   2   1        9.03        8.66      1.93 o 
  -3   2   1        3.05        2.53      1.13 o 
  -1   2   1     1650.93     1502.33      9.42 o 
   0   2   1      498.33      575.81      7.78 o 
   1   2   1     1185.58     1247.24      9.24 o 
   2   2   1      253.88      241.59      2.47 o 
   3   2   1        6.22        3.77      0.84 o 
   4   2   1        1.01        0.80      1.00 o 
   5   2   1        0.01        0.95      1.93 o 
  -5   3   1        1.26        1.62      1.22 o 
  -4   3   1        2.88        3.00      1.10 o 
  -3   3   1        9.47        9.18      1.06 o 
  -2   3   1       74.13       68.14      1.39 o 
  -1   3   1      146.55      169.65      2.07 o 
   0   3   1      908.31      954.79      9.16 o 
   1   3   1      139.17      131.14      1.66 o 
   2   3   1        2.34        2.65      0.62 o 
   3   3   1        2.02        2.11      0.66 o 
   5   3   1        2.49       -0.48      2.01 o 
  -5   4   1        1.02        2.72      1.29 o 
  -4   4   1        0.91        0.29      0.92 o 
  -3   4   1        3.43        4.94      2.67 o 
  -2   4   1      237.34      208.49      3.00 o 
  -1   4   1      276.16      275.41      2.52 o 
   0   4   1       73.88       80.94      1.19 o 
   1   4   1      157.88      158.55      1.80 o 
   2   4   1        1.67        0.96      0.44 o 
   3   4   1       18.23       18.54      1.03 o 
   4   4   1        2.11        0.60      1.66 o 
   5   4   1        1.21       -0.45      2.05 o 
  -4   5   1        8.95        7.06      2.07 o 
  -3   5   1        3.08        2.93      0.92 o 
  -1   5   1        9.39        9.92      0.68 o 
   0   5   1       71.86       61.50      1.16 o 
   1   5   1       16.23       19.78      1.18 o 
   2   5   1       97.70      100.86      1.77 o 
   3   5   1       43.01       40.72      2.31 o 
   4   5   1       11.79       14.59      1.60 o 
  -4   6   1        0.91        3.48      1.17 o 
  -3   6   1        9.66        9.47      1.21 o 
  -2   6   1        9.57       10.48      1.10 o 
  -1   6   1      100.84       98.99      1.64 o 
   0   6   1       54.30       59.28      1.25 o 
   1   6   1      189.27      205.06      2.45 o 
   2   6   1       29.85       27.80      1.10 o 
   3   6   1       12.04       15.69      1.62 o 
   4   6   1        0.31       -1.55      1.07 o 
  -4   7   1        0.00        2.32      1.23 o 
  -3   7   1        1.55        2.26      0.95 o 
  -2   7   1        7.34       10.45      1.15 o 
  -1   7   1       52.44       44.93      1.23 o 
   0   7   1       45.83       47.20      1.25 o 
   1   7   1       42.83       46.76      1.31 o 
   2   7   1       23.17       24.49      1.46 o 
   3   7   1       14.78       14.73      1.44 o 
   4   7   1        0.31       -1.03      1.65 o 
  -4   8   1        0.42        0.63      1.28 o 
  -3   8   1        0.41        1.11      1.01 o 
  -2   8   1        4.60        4.28      1.03 o 
  -1   8   1        2.76        2.62      1.15 o 
   0   8   1       46.66       44.50      1.63 o 
   1   8   1        2.55        3.53      0.83 o 
   2   8   1       18.05       15.31      1.38 o 
   3   8   1        0.37       -0.28      1.53 o 
   4   8   1        0.01        0.46      1.72 o 
  -3   9   1        2.44        2.36      1.16 o 
  -2   9   1        0.26        0.38      0.86 o 
  -1   9   1        3.48        2.36      0.88 o 
   0   9   1        4.70        2.66      0.77 o 
   1   9   1       23.58       26.03      1.82 o 
   2   9   1       19.89       21.25      2.62 o 
   3   9   1        0.01       -2.12      1.41 o 
  -3  10   1        0.35        2.15      1.24 o 
  -2  10   1        0.40        0.96      0.99 o 
  -1  10   1        0.30       -0.49      1.09 o 
   0  10   1        9.54        6.62      2.11 o 
   1  10   1       19.64       13.56      2.27 o 
   2  10   1        0.96        0.82      1.55 o 
   3  10   1        0.39       -0.03      1.64 o 
  -2  11   1        0.05        4.01      1.72 o 
  -1  11   1        0.03        1.29      1.52 o 
   0  11   1        0.12        3.26      1.70 o 
   1  11   1       16.20       14.93      2.38 o 
   2  11   1       10.43       11.08      2.38 o 
  -1  12   1        0.66        0.83      1.80 o 
   1  12   1        1.92        5.22      1.92 o 
  -2 -11   2        1.77        0.76      1.83 o 
  -1 -11   2        0.57       -0.45      1.61 o 
   0 -11   2        8.70        5.20      1.86 o 
   1 -11   2       43.81       41.78      1.97 o 
   2 -11   2        0.98       -0.19      1.37 o 
  -2 -10   2        0.41        1.12      1.15 o 
  -1 -10   2        2.82        0.91      1.40 o 
   0 -10   2        0.04        1.05      1.18 o 
   1 -10   2       11.96       11.89      1.34 o 
   2 -10   2        0.12        0.94      1.14 o 
  -3  -9   2        0.81        1.71      1.26 o 
  -2  -9   2        0.15        1.26      1.04 o 
  -1  -9   2        6.07        3.83      1.10 o 
   0  -9   2       11.04       10.81      1.19 o 
   1  -9   2        1.50        2.40      0.93 o 
   2  -9   2       10.62        9.73      1.36 o 
   3  -9   2        2.97        2.65      1.23 o 
  -3  -8   2        4.43        4.65      1.26 o 
  -2  -8   2       15.26       13.88      1.38 o 
  -1  -8   2       39.10       32.10      1.62 o 
   0  -8   2        2.23        1.29      0.93 o 
   1  -8   2       22.76       20.41      1.42 o 
   2  -8   2        0.28       -0.29      0.86 o 
   3  -8   2        6.93        4.27      1.22 o 
  -4  -7   2        0.17        0.41      1.26 o 
  -3  -7   2        0.93       -0.19      0.98 o 
  -1  -7   2        1.19        1.87      0.89 o 
   0  -7   2        3.34        3.38      0.69 o 
   1  -7   2        8.88        6.97      1.05 o 
   2  -7   2        0.20        0.37      0.83 o 
   3  -7   2        1.22        1.56      1.03 o 
   4  -7   2       27.51       25.59      2.08 o 
  -4  -6   2        4.01        1.31      1.19 o 
  -3  -6   2       27.12       21.82      1.60 o 
  -2  -6   2        7.16        4.51      1.05 o 
  -1  -6   2       23.79       25.12      0.95 o 
   0  -6   2      615.08      612.54      5.05 o 
   1  -6   2       49.71       54.13      2.48 o 
   2  -6   2        2.37        2.29      0.80 o 
   3  -6   2       19.06       17.78      1.53 o 
   4  -6   2        4.21        2.50      1.98 o 
  -4  -5   2        4.32        2.17      1.24 o 
  -3  -5   2        8.94        8.87      1.21 o 
  -2  -5   2       20.68       22.65      3.91 o 
  -1  -5   2       83.62       95.87      1.69 o 
   0  -5   2      121.64      119.76      1.69 o 
   1  -5   2        3.00        5.26      0.57 o 
   2  -5   2        2.02        3.15      0.85 o 
   3  -5   2      276.95      267.20      6.10 o 
   4  -5   2       13.50       10.44      1.40 o 
  -4  -4   2       14.86       15.48      2.33 o 
  -3  -4   2        0.32        0.40      0.79 o 
  -2  -4   2       26.76       30.13      1.34 o 
  -1  -4   2      916.60     1017.67      7.05 o 
   0  -4   2      151.97      167.05      1.87 o 
   1  -4   2      162.89      153.83      1.83 o 
   2  -4   2      263.89      254.87      3.61 o 
   3  -4   2       18.77       15.27      1.30 o 
   4  -4   2        0.06       -0.12      0.94 o 
  -5  -3   2        0.44       -0.22      2.02 o 
  -4  -3   2        5.48        5.68      1.31 o 
  -3  -3   2        3.92        4.67      1.80 o 
  -2  -3   2        1.21        2.10      0.63 o 
  -1  -3   2       49.24       65.49      1.52 o 
   0  -3   2       65.43       72.70      1.06 o 
   1  -3   2      206.68      205.57      2.01 o 
   2  -3   2     2751.35     2603.99     20.01 o 
   3  -3   2       56.69       51.81      1.80 o 
   4  -3   2        0.28       -0.76      0.88 o 
   5  -3   2        3.36        1.79      1.32 o 
  -5  -2   2        7.08        8.56      2.50 o 
  -4  -2   2        0.19       -1.32      0.93 o 
  -3  -2   2       84.34       95.47      2.37 o 
  -2  -2   2      238.77      260.61      3.47 o 
  -1  -2   2       38.52       35.18      1.59 o 
   0  -2   2       42.08       42.43      0.71 o 
   1  -2   2      841.46      812.79      6.82 o 
   2  -2   2        4.00        5.63      0.76 o 
   3  -2   2       21.38       19.71      1.33 o 
   4  -2   2        1.05        0.00      0.87 o 
   5  -2   2        5.92        5.08      1.39 o 
  -5  -1   2        3.14        2.66      2.11 o 
  -4  -1   2        0.04       -0.92      1.38 o 
  -3  -1   2        3.44        2.77      0.62 o 
  -1  -1   2      231.34      249.92      5.40 o 
   0  -1   2      816.49      834.44      6.70 o 
   1  -1   2    16144.47    14809.89    105.84 o 
   2  -1   2      335.57      327.44      3.75 o 
   3  -1   2        0.63        1.32      0.79 o 
   4  -1   2       16.68       15.89      1.42 o 
   5  -1   2        1.03        0.09      1.16 o 
  -5   0   2        1.10       -2.52      1.68 o 
  -4   0   2       18.95       20.61      2.41 o 
  -3   0   2       12.37       12.65      1.11 o 
  -2   0   2        0.85       -0.13      0.42 o 
  -1   0   2       40.09       40.42      0.67 o 
   0   0   2      418.29      394.41      3.37 o 
   1   0   2      344.58      318.10      2.44 o 
   2   0   2      167.84      152.22      1.76 o 
   3   0   2        8.01        7.89      0.98 o 
   4   0   2       42.12       47.14      1.85 o 
   5   0   2        0.10       -0.17      1.12 o 
  -4   1   2        2.40        0.56      0.94 o 
  -3   1   2        0.61        1.45      0.78 o 
  -2   1   2       34.89       33.95      1.31 o 
  -1   1   2      153.74      126.63      1.91 o 
   0   1   2     5384.40     5365.73     66.46 o 
   1   1   2       77.82       82.98      1.03 o 
   2   1   2       94.48       87.41      1.36 o 
   3   1   2       80.02       79.89      1.61 o 
   4   1   2        3.91        3.51      1.38 o 
   5   1   2        3.38        5.52      1.77 o 
  -4   2   2        0.10       -0.71      0.80 o 
  -3   2   2        4.15        3.57      0.62 o 
  -2   2   2       27.26       26.09      0.77 o 
  -1   2   2      768.17      715.40      5.15 o 
   0   2   2      594.04      554.19      4.83 o 
   1   2   2      392.27      382.46      2.94 o 
   3   2   2      203.54      206.41      2.72 o 
   4   2   2        2.06        1.26      1.01 o 
  -5   3   2        1.02        1.53      1.81 o 
  -4   3   2        0.79        1.11      0.87 o 
  -3   3   2        8.99       10.77      1.11 o 
  -2   3   2       39.99       35.34      0.92 o 
  -1   3   2      208.59      202.29      2.14 o 
   0   3   2      178.54      205.01      3.55 o 
   2   3   2       13.35       12.72      0.73 o 
   3   3   2       21.45       20.60      1.02 o 
   4   3   2       56.78       61.46      3.17 o 
   5   3   2        3.08        3.51      2.04 o 
  -5   4   2        0.01        0.35      1.52 o 
  -4   4   2        0.06        0.48      0.91 o 
  -3   4   2       15.31       19.94      1.31 o 
  -2   4   2        6.47        5.87      0.56 o 
  -1   4   2       23.04       19.51      0.67 o 
   0   4   2     3164.27     3359.39     20.36 o 
   1   4   2       69.42       71.68      1.15 o 
   2   4   2      338.97      326.40      3.18 o 
   3   4   2       13.38       14.52      0.99 o 
   4   4   2        3.49        5.73      1.90 o 
   5   4   2        1.47       -2.01      1.87 o 
  -4   5   2        7.08        5.49      1.20 o 
  -3   5   2        0.03       -0.42      0.74 o 
  -2   5   2       23.84       26.37      0.93 o 
  -1   5   2       13.78       14.19      0.70 o 
   0   5   2      166.39      197.36      2.12 o 
   2   5   2       10.59       16.27      1.42 o 
   3   5   2      306.52      304.96      3.53 o 
   4   5   2       23.29       23.01      1.76 o 
  -4   6   2        4.29        3.32      1.54 o 
  -3   6   2        1.52        1.47      0.90 o 
  -2   6   2        8.13        9.41      1.29 o 
  -1   6   2      776.70      721.50      9.92 o 
   0   6   2      159.67      173.30      2.12 o 
   1   6   2        2.98        2.04      0.51 o 
   2   6   2      150.53      143.64      2.15 o 
   3   6   2       19.01       20.17      1.92 o 
   4   6   2        0.86        0.45      1.06 o 
  -4   7   2        0.32        1.80      1.26 o 
  -3   7   2        0.32       -0.79      0.84 o 
  -2   7   2        7.11        7.40      1.01 o 
  -1   7   2        0.00        0.72      0.56 o 
   0   7   2        2.22        2.40      0.57 o 
   1   7   2        1.80        1.89      0.60 o 
   2   7   2      654.52      686.92      5.91 o 
   3   7   2       18.31       20.84      2.51 o 
   4   7   2        0.79        0.45      1.72 o 
  -4   8   2        0.21       -0.29      1.21 o 
  -3   8   2        5.06        3.35      1.10 o 
  -2   8   2       88.79       86.44      2.38 o 
  -1   8   2        0.28       -0.53      0.60 o 
   0   8   2        0.01       -0.48      1.72 o 
   1   8   2      424.06      453.47      5.78 o 
   2   8   2      171.90      176.28      5.44 o 
   3   8   2        2.42        2.07      1.56 o 
   4   8   2        0.97        1.68      1.92 o 
  -3   9   2        0.62       -0.68      1.05 o 
  -2   9   2        2.03        0.58      0.84 o 
  -1   9   2        1.20        0.61      0.81 o 
   0   9   2       55.83       60.02      3.11 o 
   1   9   2      746.81      823.86      8.97 o 
   2   9   2       15.89       13.34      2.26 o 
   3   9   2        0.56        2.44      1.75 o 
  -3  10   2       11.01       11.20      2.24 o 
  -2  10   2        0.52        0.80      1.40 o 
  -1  10   2        4.03        2.91      1.40 o 
   0  10   2      138.18      146.14      3.34 o 
   1  10   2       38.12       42.29      2.11 o 
   2  10   2        4.30        2.56      1.65 o 
   3  10   2        1.50        2.47      1.87 o 
  -2  11   2        0.08        0.83      1.44 o 
  -1  11   2        7.92        9.01      1.90 o 
   0  11   2      179.03      182.48      3.91 o 
   1  11   2       13.31       13.11      2.26 o 
   2  11   2        5.36        4.76      2.01 o 
  -1  12   2       30.38       29.20      2.72 o 
   0  12   2        1.64        2.99      1.91 o 
   1  12   2        0.06        0.62      1.71 o 
  -1 -11   3        0.46       -0.30      1.20 o 
   0 -11   3        2.58        3.90      1.78 o 
   1 -11   3        0.04        3.36      1.90 o 
  -2 -10   3        0.00        0.20      2.66 o 
  -1 -10   3       14.97       17.50      1.69 o 
   0 -10   3        7.16        6.81      1.81 o 
   1 -10   3        0.46        0.47      1.52 o 
   2 -10   3        9.86       11.99      1.54 o 
  -3  -9   3        0.89        3.12      1.32 o 
  -2  -9   3        0.18        0.17      1.02 o 
  -1  -9   3       10.11       11.97      2.12 o 
   0  -9   3       10.30        7.98      1.26 o 
   1  -9   3        0.63        0.30      0.85 o 
   2  -9   3        9.15       10.58      1.42 o 
   3  -9   3        0.08        0.19      1.18 o 
  -3  -8   3        0.19       -0.14      1.06 o 
  -2  -8   3       46.07       39.77      2.13 o 
  -1  -8   3       34.65       28.61      1.63 o 
   0  -8   3        0.39        0.87      0.70 o 
   1  -8   3       53.04       55.84      1.89 o 
   2  -8   3        1.17        0.39      1.00 o 
   3  -8   3        0.91        1.08      1.13 o 
  -4  -7   3        1.16        1.05      1.40 o 
  -3  -7   3        2.18        1.07      1.10 o 
  -2  -7   3       32.67       34.65      1.72 o 
  -1  -7   3        6.78        7.98      1.11 o 
   0  -7   3        6.66        8.77      0.89 o 
   1  -7   3      179.49      189.06      3.29 o 
   2  -7   3        3.24        2.72      0.96 o 
   3  -7   3        0.18       -1.38      0.92 o 
   4  -7   3       10.53        7.73      1.55 o 
  -4  -6   3        3.35        3.04      1.36 o 
  -3  -6   3       80.32       75.96      2.55 o 
  -2  -6   3        0.21       -0.05      1.34 o 
  -1  -6   3       17.86       19.34      1.27 o 
   0  -6   3       57.16       68.58      1.45 o 
   1  -6   3        2.24        0.79      0.84 o 
   2  -6   3        0.26        0.59      0.79 o 
   3  -6   3        9.03        8.63      1.37 o 
   4  -6   3        0.55        1.95      1.19 o 
  -4  -5   3        3.95        4.97      1.36 o 
  -3  -5   3       19.31       20.07      1.57 o 
  -2  -5   3        0.04        0.19      0.68 o 
  -1  -5   3        0.07       -0.20      0.62 o 
   0  -5   3      547.49      589.48      9.14 o 
   1  -5   3        8.06       10.35      0.95 o 
   2  -5   3       11.16       11.66      1.12 o 
   3  -5   3       80.51       83.62      2.54 o 
   4  -5   3       12.79       13.12      1.53 o 
  -4  -4   3       44.97       49.34      2.30 o 
  -3  -4   3        1.88        1.47      1.63 o 
  -2  -4   3        6.70        8.78      1.21 o 
  -1  -4   3      367.59      409.53      4.76 o 
   0  -4   3       45.24       46.55      1.00 o 
   1  -4   3       47.04       46.34      1.04 o 
   2  -4   3       19.47       20.50      1.27 o 
   3  -4   3       41.15       46.88      1.87 o 
   4  -4   3        2.05        0.76      0.94 o 
  -4  -3   3       15.32       19.04      1.72 o 
  -3  -3   3        0.67        1.77      0.83 o 
  -2  -3   3       59.79       61.44      1.73 o 
  -1  -3   3      725.20      771.36      7.22 o 
   0  -3   3       70.28       61.11      1.30 o 
   1  -3   3        6.52        7.04      0.48 o 
   2  -3   3      262.38      265.93      4.35 o 
   3  -3   3       53.64       52.15      1.85 o 
   4  -3   3        0.03       -0.65      0.87 o 
   5  -3   3        0.07       -0.35      1.27 o 
  -5  -2   3        5.75        8.09      2.42 o 
  -4  -2   3        4.07        3.20      1.27 o 
  -3  -2   3       11.30       15.10      1.40 o 
  -2  -2   3      332.81      350.42      4.31 o 
  -1  -2   3      501.04      471.97      4.80 o 
   0  -2   3       85.96       90.30      1.12 o 
   1  -2   3      411.32      399.83      3.17 o 
   2  -2   3      500.82      482.29      5.15 o 
   3  -2   3        2.30        0.19      0.74 o 
   4  -2   3        0.88        1.07      0.96 o 
   5  -2   3        0.76       -0.16      1.21 o 
  -5  -1   3        0.40       -0.68      1.89 o 
  -4  -1   3       20.15       22.95      1.72 o 
  -3  -1   3        7.93       10.23      1.46 o 
  -2  -1   3       85.74       92.75      1.92 o 
   0  -1   3      126.50      122.45      1.24 o 
   1  -1   3      402.04      357.13      2.82 o 
   2  -1   3       38.54       31.81      1.23 o 
   3  -1   3        1.84        2.36      0.85 o 
   4  -1   3        1.84        2.98      0.98 o 
   5  -1   3        0.03        0.18      1.19 o 
  -5   0   3        0.66        2.41      1.98 o 
  -4   0   3       10.07       10.29      1.96 o 
  -3   0   3       55.47       57.69      1.39 o 
  -2   0   3       46.21       40.04      0.92 o 
   0   0   3      892.51      907.82      5.85 o 
   1   0   3       94.99       85.59      1.09 o 
   2   0   3      136.35      122.09      1.56 o 
   3   0   3       28.89       27.90      1.39 o 
   4   0   3        6.51        4.79      1.59 o 
   5   0   3        0.05       -0.67      1.16 o 
  -5   1   3       23.59       21.35      2.97 o 
  -4   1   3        2.33        1.77      1.59 o 
  -3   1   3        0.37       -0.08      0.52 o 
  -2   1   3        1.19        1.10      0.35 o 
  -1   1   3       24.04       22.84      0.75 o 
   0   1   3     2742.27     2658.97     16.13 o 
   1   1   3      121.78      122.13      1.36 o 
   2   1   3       10.19       12.37      0.66 o 
   3   1   3       53.21       52.30      1.34 o 
   4   1   3        1.07        0.06      0.87 o 
   5   1   3        0.00        1.36      1.20 o 
  -4   2   3        0.74       -0.87      1.16 o 
  -3   2   3        8.65       10.12      0.79 o 
  -2   2   3      149.02      144.20      2.28 o 
  -1   2   3      951.24      901.00     10.44 o 
   0   2   3      219.08      257.36      2.77 o 
   1   2   3     1661.65     1654.74     36.08 o 
   3   2   3        5.77        6.16      1.14 o 
   4   2   3        2.42        3.81      3.98 o 
   5   2   3        6.83       12.30      2.24 o 
  -4   3   3        0.77        0.31      0.92 o 
  -3   3   3        0.19       -0.21      0.71 o 
  -2   3   3       36.09       37.93      1.01 o 
  -1   3   3      291.12      237.97      4.07 o 
   0   3   3      157.85      145.64      3.00 o 
   1   3   3      992.65      991.92      6.66 o 
   2   3   3        9.82       11.24      0.67 o 
   3   3   3        2.41        0.96      0.64 o 
   4   3   3        0.41        0.16      1.03 o 
   5   3   3        3.46        6.76      1.80 o 
  -4   4   3        0.87        1.80      0.98 o 
  -3   4   3       85.16       82.04      2.18 o 
  -2   4   3       44.91       46.81      1.11 o 
  -1   4   3       19.75       20.55      0.68 o 
   0   4   3      417.79      415.34      4.39 o 
   2   4   3        3.68        4.33      0.59 o 
   3   4   3       33.42       39.86      1.32 o 
   4   4   3       16.22       20.47      1.66 o 
  -4   5   3        2.78        2.18      1.06 o 
  -3   5   3        5.82        6.12      1.04 o 
  -2   5   3        0.06       -0.27      0.49 o 
  -1   5   3        0.13        0.03      0.36 o 
   0   5   3      658.19      699.86     12.49 o 
   2   5   3      107.41      112.33      1.79 o 
   3   5   3       25.48       24.87      1.37 o 
   4   5   3       15.94       19.62      1.70 o 
  -4   6   3       19.23       20.25      1.77 o 
  -3   6   3        2.89        2.74      0.89 o 
  -2   6   3        4.85        6.70      0.92 o 
  -1   6   3      336.88      328.92      4.34 o 
   1   6   3       58.91       59.53      1.22 o 
   2   6   3        2.47        2.45      0.62 o 
   3   6   3        5.12        3.95      0.89 o 
   4   6   3        2.98        2.97      1.74 o 
  -4   7   3        3.40        4.74      1.34 o 
  -3   7   3        0.15        0.82      0.97 o 
  -2   7   3        1.84        2.63      1.81 o 
  -1   7   3       33.38       30.22      1.06 o 
   0   7   3        3.08        2.87      0.61 o 
   1   7   3       38.88       37.97      1.12 o 
   2   7   3      119.01      114.12      2.78 o 
   3   7   3      113.86      117.69      4.56 o 
   4   7   3        0.29        0.88      1.69 o 
  -4   8   3        0.09       -0.28      1.24 o 
  -3   8   3        0.00       -0.38      0.98 o 
  -2   8   3       65.63       62.15      2.31 o 
  -1   8   3       28.91       26.61      1.08 o 
   0   8   3        0.56        0.92      0.89 o 
   1   8   3       36.79       38.57      1.81 o 
   2   8   3       26.03       27.51      2.36 o 
   3   8   3        6.74        8.89      2.07 o 
   4   8   3        1.58        1.96      1.86 o 
  -3   9   3        0.65        0.06      1.07 o 
  -2   9   3        4.65        6.36      1.58 o 
  -1   9   3        0.36        0.06      1.35 o 
   0   9   3        1.17       -1.26      1.47 o 
   1   9   3       35.56       36.92      4.19 o 
   2   9   3       69.58       74.74      3.85 o 
   3   9   3        0.18       -0.70      1.53 o 
  -3  10   3        5.85        4.06      1.83 o 
  -2  10   3        4.98        2.75      1.64 o 
  -1  10   3        0.78        2.45      1.34 o 
   0  10   3        1.92       -0.01      1.74 o 
   1  10   3        1.95       -0.19      1.09 o 
   2  10   3        5.04        1.56      1.68 o 
   3  10   3       15.16       18.48      2.68 o 
  -2  11   3        0.16        0.79      1.59 o 
  -1  11   3        0.53        0.09      1.34 o 
   0  11   3       18.80       17.41      2.97 o 
   1  11   3        1.36       -0.73      1.32 o 
   2  11   3        3.08        5.72      1.96 o 
  -1  12   3        0.19        1.59      1.87 o 
   0  12   3       18.64       21.85      1.86 o 
   1  12   3        3.94        0.65      1.72 o 
   2  12   3        0.33        0.86      2.04 o 
  -1 -11   4        0.34        0.95      1.30 o 
   0 -11   4        0.90        2.11      1.77 o 
   1 -11   4        0.60        1.16      1.89 o 
  -2 -10   4        0.01        1.30      2.22 o 
  -1 -10   4        0.46        0.07      1.17 o 
   0 -10   4        0.04       -0.58      1.46 o 
   1 -10   4        0.00        2.04      1.55 o 
   2 -10   4        0.50        1.83      1.22 o 
  -3  -9   4        0.15        0.74      1.27 o 
  -2  -9   4        0.83       -0.46      2.42 o 
  -1  -9   4        7.01        9.08      1.39 o 
   0  -9   4        7.70        4.79      2.68 o 
   1  -9   4        2.16        1.16      0.89 o 
   2  -9   4        5.30        1.96      1.14 o 
   3  -9   4        0.24       -1.04      1.16 o 
  -3  -8   4        0.28       -0.57      1.16 o 
  -2  -8   4        0.15        0.98      1.04 o 
  -1  -8   4        0.04        1.69      1.64 o 
   0  -8   4        2.40        2.87      1.08 o 
   1  -8   4        1.82        1.10      0.85 o 
   2  -8   4        1.53       -0.60      1.09 o 
   3  -8   4        0.01       -0.84      1.12 o 
  -3  -7   4        0.09        0.87      1.53 o 
  -2  -7   4       16.60       20.22      1.60 o 
  -1  -7   4        0.55        0.60      1.16 o 
   0  -7   4       16.44       15.23      0.97 o 
   1  -7   4       84.24       75.84      2.32 o 
   2  -7   4        1.16        0.69      0.90 o 
   3  -7   4        0.21       -0.57      1.00 o 
   4  -7   4        7.03       10.49      1.66 o 
  -4  -6   4        1.37       -1.83      1.22 o 
  -3  -6   4        4.11        3.71      1.18 o 
  -2  -6   4        6.14        3.07      0.95 o 
  -1  -6   4        1.02        1.92      0.85 o 
   0  -6   4        2.92        2.37      1.01 o 
   1  -6   4        4.36        2.25      0.76 o 
   2  -6   4        0.49       -0.79      0.80 o 
   3  -6   4        0.99        0.80      1.04 o 
   4  -6   4       27.58       23.40      1.96 o 
  -4  -5   4        0.89        1.51      1.24 o 
  -3  -5   4       12.27       14.78      2.42 o 
  -2  -5   4        9.39        6.36      1.01 o 
  -1  -5   4       42.85       41.66      1.58 o 
   0  -5   4       71.49       74.02      1.40 o 
   1  -5   4        0.66        0.68      0.51 o 
   2  -5   4       16.91       13.80      1.21 o 
   3  -5   4       63.99       75.11      3.42 o 
   4  -5   4        2.38        1.24      1.12 o 
  -4  -4   4        0.00       -1.46      1.40 o 
  -3  -4   4        0.18        0.23      0.80 o 
  -2  -4   4        9.23        7.75      0.98 o 
  -1  -4   4       40.17       34.44      1.37 o 
   0  -4   4       12.73       11.19      0.63 o 
   2  -4   4        6.19        9.09      1.90 o 
   3  -4   4      179.30      172.97      4.91 o 
   4  -4   4        1.69        2.04      1.05 o 
  -4  -3   4       12.75       16.96      1.72 o 
  -3  -3   4        6.79        7.03      2.53 o 
  -2  -3   4      152.24      149.63      3.89 o 
  -1  -3   4        2.24       -0.33      0.91 o 
   0  -3   4      279.65      273.26      2.54 o 
   1  -3   4       18.03       16.10      1.23 o 
   2  -3   4      201.70      204.79      3.23 o 
   3  -3   4        1.45        1.35      0.86 o 
   4  -3   4        5.47        4.17      1.78 o 
  -4  -2   4        1.39        1.99      1.09 o 
  -3  -2   4        6.59        6.86      1.05 o 
  -2  -2   4       12.34       12.13      1.05 o 
  -1  -2   4       31.33       32.62      1.17 o 
   0  -2   4       15.71       18.72      0.60 o 
   1  -2   4       10.34       10.80      0.54 o 
   2  -2   4      606.70      575.12      5.91 o 
   4  -2   4        4.02        3.58      1.07 o 
  -5  -1   4        0.19       -2.59      1.72 o 
  -4  -1   4        0.26       -2.29      1.98 o 
  -3  -1   4       20.54       20.17      1.29 o 
  -1  -1   4       67.68       72.09      1.50 o 
   0  -1   4      126.98      140.05      2.00 o 
   1  -1   4      266.29      229.65      2.15 o 
   2  -1   4       60.04       67.56      1.68 o 
   3  -1   4       49.44       48.03      1.75 o 
   4  -1   4        8.15        6.93      1.16 o 
   5  -1   4        2.24        0.52      2.10 o 
  -5   0   4        0.04        1.00      1.87 o 
  -4   0   4        0.73        0.15      1.46 o 
  -3   0   4        1.77        1.81      0.72 o 
  -2   0   4        0.53        0.47      0.33 o 
  -1   0   4       58.07       60.09      1.83 o 
   0   0   4       60.43       52.81      0.84 o 
   1   0   4       15.07       12.32      0.85 o 
   2   0   4       10.33       10.78      1.14 o 
   3   0   4       15.76       18.80      1.25 o 
   4   0   4        9.33        7.90      1.18 o 
   5   0   4        0.02        0.21      1.18 o 
  -5   1   4        0.59        1.74      2.05 o 
  -4   1   4        4.36        0.71      1.64 o 
  -3   1   4        4.27        4.11      0.63 o 
  -2   1   4       57.02       58.89      1.95 o 
  -1   1   4      142.34      141.30      1.57 o 
   0   1   4      749.21      726.75      4.90 o 
   1   1   4      167.33      153.01      1.62 o 
   2   1   4      242.22      231.30      2.40 o 
   3   1   4        4.61        3.24      0.88 o 
   4   1   4       14.74       18.00      1.49 o 
   5   1   4        4.66        4.31      1.39 o 
  -5   2   4        0.16        5.08      2.19 o 
  -4   2   4        0.06       -1.87      1.47 o 
  -3   2   4        1.36       -0.09      0.50 o 
  -2   2   4      132.23      142.97      1.89 o 
  -1   2   4        6.14        5.39      0.54 o 
   0   2   4      364.53      354.20      3.65 o 
   1   2   4      238.97      246.15      2.21 o 
   2   2   4       71.83       74.31      1.32 o 
   3   2   4        3.00        3.57      0.70 o 
   4   2   4        0.54        0.62      2.69 o 
   5   2   4       24.43       27.62      3.33 o 
  -4   3   4        0.24       -0.15      1.38 o 
  -3   3   4        0.30        0.93      0.54 o 
  -2   3   4       82.24       75.77      1.40 o 
  -1   3   4        7.99       10.58      0.54 o 
   0   3   4        2.44        2.30      0.47 o 
   1   3   4     2040.35     1997.73     12.54 o 
   2   3   4       38.21       32.53      0.97 o 
   3   3   4       31.89       29.58      1.14 o 
   4   3   4       25.81       29.08      2.11 o 
   5   3   4        0.69        3.57      1.83 o 
  -4   4   4        0.64        2.30      1.10 o 
  -3   4   4       30.64       34.37      2.20 o 
  -2   4   4       37.91       36.08      1.29 o 
  -1   4   4        1.10        0.43      0.31 o 
   0   4   4        4.96        6.11      0.66 o 
   1   4   4      165.91      172.52      2.65 o 
   2   4   4      139.33      147.06      1.99 o 
   3   4   4       29.18       32.88      1.26 o 
   4   4   4      108.54      111.21      3.25 o 
  -4   5   4        0.14        1.80      1.07 o 
  -3   5   4       15.04       14.27      1.28 o 
  -2   5   4       10.71       11.01      0.76 o 
  -1   5   4       12.38       13.76      0.95 o 
   0   5   4      663.04      706.16     10.08 o 
   1   5   4       25.21       23.22      0.68 o 
   2   5   4        9.34        7.98      0.69 o 
   3   5   4      173.94      169.14      2.57 o 
   4   5   4        8.21        7.84      1.92 o 
  -4   6   4        3.40        4.37      1.25 o 
  -3   6   4        3.18        2.71      1.36 o 
  -2   6   4        0.28       -0.27      0.52 o 
  -1   6   4       38.66       37.24      1.10 o 
   0   6   4        0.44        1.33      0.43 o 
   2   6   4        2.91        2.87      0.88 o 
   3   6   4      251.45      259.74      4.25 o 
   4   6   4        2.24        1.01      1.65 o 
  -4   7   4        7.95        7.36      2.07 o 
  -3   7   4        0.08        0.79      0.92 o 
  -2   7   4       24.86       26.93      1.33 o 
  -1   7   4       49.52       45.05      1.22 o 
   0   7   4       43.92       48.94      1.73 o 
   1   7   4        6.85        6.23      1.03 o 
   2   7   4      417.43      409.23      5.50 o 
   3   7   4       66.33       70.64      2.37 o 
   4   7   4        4.43        4.07      1.83 o 
  -4   8   4        2.03        1.27      1.37 o 
  -3   8   4        1.10        0.70      1.46 o 
  -2   8   4        5.69        5.58      1.02 o 
  -1   8   4        1.55        1.71      0.82 o 
   0   8   4        4.70        2.21      0.91 o 
   1   8   4       25.99       22.39      1.53 o 
   2   8   4      379.80      404.20      5.70 o 
   3   8   4        1.74        1.38      1.62 o 
   4   8   4        0.40        3.06      1.84 o 
  -3   9   4        3.31        2.35      1.65 o 
  -2   9   4        7.23        5.77      1.58 o 
  -1   9   4        7.76        4.50      1.01 o 
   0   9   4       25.82       22.14      1.46 o 
   1   9   4      136.59      145.32      3.33 o 
   2   9   4        5.14        5.32      2.21 o 
   3   9   4       12.81       10.69      2.30 o 
  -3  10   4        0.93       -0.67      1.59 o 
  -2  10   4        2.42        0.49      1.34 o 
  -1  10   4        0.02        0.71      0.83 o 
   0  10   4        0.83       -0.33      0.95 o 
   1  10   4       82.73       82.63      2.70 o 
   2  10   4        1.96        1.01      1.56 o 
   3  10   4        1.28        0.52      1.72 o 
  -2  11   4        0.46        1.29      1.65 o 
  -1  11   4        0.15        0.55      1.47 o 
   0  11   4       34.99       32.04      1.88 o 
   1  11   4       14.45       14.03      1.65 o 
   2  11   4        3.53        6.59      2.14 o 
   0  12   4        9.23        6.46      1.38 o 
   1  12   4        5.96        7.56      1.86 o 
   2  12   4        3.87        5.81      2.29 o 
   0 -11   5       17.07       20.52      2.84 o 
  -2 -10   5        0.49        1.83      1.33 o 
  -1 -10   5        0.30        0.61      2.04 o 
   0 -10   5        3.69        8.67      2.05 o 
   1 -10   5        1.13        4.62      1.99 o 
   2 -10   5        0.02       -1.12      1.22 o 
  -2  -9   5        1.91        1.71      1.20 o 
  -1  -9   5       64.59       58.34      2.39 o 
   0  -9   5        9.22        9.04      1.89 o 
   1  -9   5        2.22        3.43      1.65 o 
   2  -9   5       14.24       13.61      4.42 o 
  -3  -8   5        0.31        0.69      1.24 o 
  -2  -8   5        3.90        2.06      1.19 o 
  -1  -8   5       18.77       21.96      1.60 o 
   0  -8   5        2.21        1.09      1.46 o 
   1  -8   5        1.15        0.60      0.80 o 
   2  -8   5       33.84       36.46      1.90 o 
   3  -8   5        2.37        2.15      1.51 o 
  -3  -7   5        5.70        3.83      1.30 o 
  -2  -7   5      136.91      123.45      3.18 o 
  -1  -7   5        1.76        0.15      0.99 o 
   0  -7   5        5.65        6.92      1.23 o 
   1  -7   5       30.97       31.82      1.53 o 
   2  -7   5        0.29        0.17      2.03 o 
   3  -7   5        0.00        0.94      1.11 o 
  -4  -6   5        0.59       -0.56      1.32 o 
  -3  -6   5       12.48       10.43      2.42 o 
  -2  -6   5       19.22       20.00      1.44 o 
  -1  -6   5       11.86       13.22      1.27 o 
   0  -6   5        3.65        3.56      0.63 o 
   1  -6   5       54.51       56.61      1.82 o 
   2  -6   5        3.71        0.61      1.20 o 
   3  -6   5        5.64        4.89      1.20 o 
   4  -6   5       17.58       20.04      7.28 o 
  -4  -5   5        0.11        0.34      1.27 o 
  -3  -5   5       88.24       87.50      2.74 o 
  -2  -5   5        2.40        0.61      0.93 o 
  -1  -5   5        1.79        2.42      0.78 o 
   0  -5   5      191.32      189.16      2.34 o 
   1  -5   5        4.40        5.90      0.71 o 
   2  -5   5        7.08        7.47      1.06 o 
   3  -5   5        4.42        4.04      1.70 o 
   4  -5   5       11.90       11.24      1.56 o 
  -4  -4   5        1.39        0.71      1.72 o 
  -3  -4   5       16.81       20.16      1.59 o 
  -2  -4   5       77.99       78.26      2.20 o 
  -1  -4   5       81.05       75.32      2.08 o 
   1  -4   5        9.98       12.31      0.78 o 
   2  -4   5        2.56        2.47      0.87 o 
   3  -4   5       39.89       45.02      1.95 o 
   4  -4   5        1.22       -0.13      1.03 o 
  -4  -3   5        8.21        6.63      2.18 o 
  -3  -3   5        0.13       -0.30      0.97 o 
  -2  -3   5       64.47       63.45      2.37 o 
  -1  -3   5      229.73      245.59      4.06 o 
   0  -3   5       39.74       35.75      0.91 o 
   2  -3   5       81.16       79.92      2.08 o 
   3  -3   5       56.38       51.37      1.92 o 
   4  -3   5        0.76        1.83      1.03 o 
  -4  -2   5        1.68        0.54      1.13 o 
  -3  -2   5      248.45      254.49      4.19 o 
  -2  -2   5       19.90       20.04      1.16 o 
  -1  -2   5      152.12      146.27      2.50 o 
   0  -2   5        7.48        9.62      0.85 o 
   2  -2   5       36.74       36.23      1.47 o 
   3  -2   5        2.75        3.32      0.91 o 
   4  -2   5        1.17        0.31      1.94 o 
   5  -2   5        0.13       -1.93      1.73 o 
  -4  -1   5        0.03       -2.32      1.72 o 
  -3  -1   5       35.63       32.10      2.72 o 
  -2  -1   5       53.69       55.02      3.32 o 
  -1  -1   5       54.02       55.30      1.42 o 
   0  -1   5      312.61      302.73      2.63 o 
   1  -1   5      187.66      180.72      2.02 o 
   2  -1   5        0.09        0.09      0.35 o 
   3  -1   5       87.34       89.41      2.31 o 
   4  -1   5        0.12       -0.79      0.89 o 
   5  -1   5        0.88       -0.80      2.02 o 
  -4   0   5      197.33      228.80      4.29 o 
  -3   0   5       10.77        9.99      1.07 o 
  -2   0   5      105.55       95.37      2.01 o 
  -1   0   5        0.03        0.06      0.26 o 
   0   0   5        0.06       -0.12      0.34 o 
   1   0   5      146.30      120.24      1.51 o 
   2   0   5        7.64        8.13      0.66 o 
   3   0   5       17.34       15.79      1.27 o 
   4   0   5        0.72        0.39      1.10 o 
   5   0   5        1.27        0.53      1.19 o 
  -4   1   5       48.18       46.52      3.08 o 
  -3   1   5        0.14        0.25      0.66 o 
  -2   1   5        6.82        7.64      0.58 o 
  -1   1   5     1093.62     1204.10     16.43 o 
   0   1   5      460.00      475.22      3.60 o 
   1   1   5      114.46      113.38      1.45 o 
   2   1   5      795.72      763.75      5.73 o 
   3   1   5       46.18       53.13      1.77 o 
   4   1   5        0.10        0.88      0.91 o 
   5   1   5        3.77        2.91      1.34 o 
  -4   2   5        0.07       -0.74      1.41 o 
  -3   2   5        0.52       -0.05      0.51 o 
  -2   2   5        5.28        4.70      0.64 o 
  -1   2   5       90.45       82.47      1.55 o 
   0   2   5       83.09       99.17      1.22 o 
   1   2   5        4.56        3.75      0.39 o 
   2   2   5      465.75      427.10      3.73 o 
   3   2   5        0.96        0.54      0.62 o 
   4   2   5        0.64       -0.17      0.93 o 
   5   2   5        6.05        5.04      2.11 o 
  -4   3   5        2.44        1.98      1.50 o 
  -3   3   5       25.33       25.53      1.09 o 
  -2   3   5      577.71      576.72      5.14 o 
  -1   3   5       25.38       28.66      0.80 o 
   0   3   5        8.04        8.84      0.90 o 
   1   3   5      737.87      740.73      6.95 o 
   2   3   5      189.62      209.08      2.39 o 
   3   3   5        9.99       13.12      0.95 o 
   4   3   5       15.61       19.09      3.49 o 
   5   3   5        3.00        5.03      1.49 o 
  -3   4   5       10.89       12.38      1.20 o 
  -2   4   5       11.73       12.85      0.81 o 
  -1   4   5       87.06       83.79      1.33 o 
   0   4   5       22.66       24.71      1.08 o 
   1   4   5      449.10      457.62      5.05 o 
   2   4   5       13.00       17.24      1.18 o 
   3   4   5       28.35       27.81      1.92 o 
   4   4   5       60.07       61.83      3.14 o 
  -4   5   5        2.05        1.10      1.82 o 
  -3   5   5      114.75      123.68      4.78 o 
  -2   5   5        9.22       10.76      0.77 o 
  -1   5   5        0.00        0.10      0.36 o 
   0   5   5     1005.20     1010.44      9.29 o 
   2   5   5        5.65        5.79      0.66 o 
   3   5   5        0.62       -1.20      0.88 o 
   4   5   5        0.73        1.25      1.11 o 
  -4   6   5        1.97        1.77      1.19 o 
  -3   6   5       14.07       18.61      1.45 o 
  -2   6   5        0.47       -0.08      0.52 o 
  -1   6   5       26.45       24.08      1.21 o 
   0   6   5       10.74       13.89      1.07 o 
   1   6   5       78.06       76.09      2.02 o 
   2   6   5       13.28       13.76      2.10 o 
   3   6   5      184.24      193.36      3.73 o 
   4   6   5       57.67       62.10      3.52 o 
  -4   7   5        5.92        6.41      1.43 o 
  -3   7   5        0.85        0.27      2.08 o 
  -2   7   5        2.19        2.90      0.75 o 
  -1   7   5      232.76      222.42      3.60 o 
   0   7   5       97.37      109.25      2.51 o 
   1   7   5        1.20       -0.63      0.71 o 
   2   7   5       26.11       27.83      4.01 o 
   3   7   5        5.98        5.75      1.24 o 
   4   7   5        0.08        3.72      1.78 o 
  -4   8   5        0.69        2.48      2.31 o 
  -3   8   5       13.67       11.30      1.95 o 
  -2   8   5        6.32        6.97      1.49 o 
  -1   8   5        0.67        0.74      0.79 o 
   0   8   5       17.36       15.19      3.28 o 
   1   8   5        0.71       -0.45      0.91 o 
   2   8   5       91.05       95.34      2.76 o 
   3   8   5       20.73       24.22      1.79 o 
   4   8   5        0.03        0.28      1.68 o 
  -3   9   5        0.00       -1.16      1.41 o 
  -2   9   5       16.61       15.54      2.08 o 
  -1   9   5        4.05        5.06      0.96 o 
   0   9   5        0.01       -1.12      0.75 o 
   1   9   5        4.42        4.24      1.86 o 
   2   9   5        9.28        8.95      1.36 o 
   3   9   5        1.52        5.72      2.07 o 
  -3  10   5        2.65        4.00      1.81 o 
  -2  10   5        0.11        0.62      1.34 o 
  -1  10   5        0.43        1.96      1.19 o 
   0  10   5        5.96        3.45      1.08 o 
   1  10   5       42.72       40.69      2.01 o 
   2  10   5        3.20        3.21      1.52 o 
   3  10   5        1.24       -0.74      1.78 o 
  -2  11   5        0.62       -0.15      1.61 o 
  -1  11   5        6.70        7.40      1.98 o 
   0  11   5        5.42        4.94      1.25 o 
   1  11   5       23.36       29.50      1.98 o 
   2  11   5       28.98       35.68      3.18 o 
  -1  12   5        3.02        4.42      1.90 o 
   0  12   5        2.45        2.63      1.87 o 
   1  12   5        0.42        0.82      2.41 o 
   2  12   5        3.50        6.66      2.24 o 
  -1 -10   6        1.78        3.03      2.74 o 
   0 -10   6        0.05        0.01      1.93 o 
   1 -10   6        0.00        0.19      1.95 o 
  -2  -9   6        1.50       -0.29      1.25 o 
  -1  -9   6        0.25        0.38      1.17 o 
   0  -9   6        0.76       -0.21      1.59 o 
   1  -9   6        0.13       -0.62      1.74 o 
   2  -9   6        0.58        1.81      1.18 o 
  -3  -8   6        0.35        0.01      1.33 o 
  -2  -8   6        6.02        8.16      1.88 o 
  -1  -8   6        0.02        0.84      1.40 o 
   0  -8   6        7.29        9.00      2.85 o 
   1  -8   6        0.68        1.00      1.46 o 
   2  -8   6        6.16        4.50      1.17 o 
   3  -8   6        0.31        0.05      1.19 o 
  -3  -7   6        2.12        1.41      1.16 o 
  -2  -7   6        0.78        2.20      1.09 o 
  -1  -7   6        1.69        0.98      1.81 o 
   0  -7   6        0.36       -0.07      1.74 o 
   1  -7   6        0.13       -0.20      0.78 o 
   2  -7   6        0.04        1.68      0.95 o 
   3  -7   6        0.31        0.94      1.15 o 
  -3  -6   6        0.85        1.62      1.39 o 
  -2  -6   6        0.08        1.37      1.30 o 
  -1  -6   6       29.30       27.74      1.61 o 
   0  -6   6        2.25        1.43      0.97 o 
   1  -6   6        1.12       -0.38      0.76 o 
   2  -6   6        4.06        7.14      1.73 o 
   3  -6   6        0.00        0.21      1.05 o 
   4  -6   6        7.94        9.42      3.72 o 
  -4  -5   6        1.25       -1.03      1.28 o 
  -3  -5   6        2.05        0.74      1.04 o 
  -2  -5   6        0.02       -0.17      1.32 o 
  -1  -5   6        3.65        3.68      0.90 o 
   0  -5   6       18.36       18.71      1.31 o 
   1  -5   6        1.12        1.13      0.71 o 
   2  -5   6        0.10        0.50      0.82 o 
   3  -5   6        1.36        2.75      1.11 o 
   4  -5   6        6.24        3.00      2.13 o 
  -4  -4   6        1.04        0.99      1.40 o 
  -3  -4   6        5.66        8.02      1.25 o 
  -2  -4   6       43.97       38.73      2.28 o 
  -1  -4   6       20.49       20.72      1.35 o 
   0  -4   6       10.02        7.45      0.96 o 
   1  -4   6       44.94       44.79      1.20 o 
   2  -4   6       17.91       20.28      1.39 o 
   3  -4   6       25.03       26.81      1.65 o 
   4  -4   6        0.05        0.21      1.08 o 
  -4  -3   6       12.22       10.14      1.71 o 
  -3  -3   6        6.72        5.51      1.08 o 
  -2  -3   6        7.13        6.04      0.94 o 
  -1  -3   6       10.93       12.83      1.08 o 
   0  -3   6        0.60        1.29      0.64 o 
   1  -3   6        2.94        1.47      0.69 o 
   2  -3   6       10.02       13.50      1.22 o 
   3  -3   6       11.26       10.53      1.27 o 
   4  -3   6        0.00       -0.32      1.00 o 
  -4  -2   6        0.35        0.86      1.21 o 
  -2  -2   6        1.66        2.87      1.05 o 
   0  -2   6        1.68        3.01      0.42 o 
   1  -2   6      104.16      104.12      1.58 o 
   2  -2   6       24.72       21.93      1.29 o 
   3  -2   6        5.24        4.90      1.04 o 
   4  -2   6        4.52        3.82      1.10 o 
  -4  -1   6        1.78        0.60      1.94 o 
  -3  -1   6       63.76       71.28      3.84 o 
  -2  -1   6       11.13        9.91      0.95 o 
  -1  -1   6        3.26        1.44      0.66 o 
   0  -1   6       20.70       17.06      0.70 o 
   1  -1   6       61.65       58.28      1.15 o 
   2  -1   6       23.32       19.00      0.89 o 
   3  -1   6        5.39        4.25      0.98 o 
   4  -1   6        4.77        3.40      1.12 o 
   5  -1   6        1.44       -0.16      1.25 o 
  -4   0   6        2.78        0.15      1.10 o 
  -3   0   6        0.00       -0.71      1.23 o 
  -2   0   6        7.35        9.09      0.85 o 
  -1   0   6        1.00        2.02      0.35 o 
   0   0   6      224.75      239.60      2.33 o 
   1   0   6       66.64       65.96      1.18 o 
   2   0   6        8.52       11.23      0.80 o 
   3   0   6       13.44       14.59      1.27 o 
   4   0   6        0.02        1.02      2.62 o 
   5   0   6        1.42       -0.14      1.28 o 
  -4   1   6        5.14        5.99      1.80 o 
  -3   1   6        0.94        1.01      0.69 o 
  -2   1   6       24.94       24.30      0.87 o 
  -1   1   6       50.27       59.99      1.18 o 
   1   1   6        7.57        7.10      0.56 o 
   2   1   6       57.65       53.15      1.23 o 
   3   1   6        1.74        1.94      0.90 o 
   4   1   6        0.14       -0.45      0.92 o 
   5   1   6        1.45        0.24      1.28 o 
  -4   2   6        2.54        3.64      1.75 o 
  -3   2   6       17.88       19.95      1.26 o 
  -2   2   6       23.06       23.37      0.92 o 
  -1   2   6      116.04      118.94      1.61 o 
   0   2   6       10.51       13.19      0.57 o 
   1   2   6       23.02       20.14      0.70 o 
   2   2   6      132.07      126.24      1.84 o 
   3   2   6        0.54        0.09      0.63 o 
   5   2   6        6.98        5.30      1.53 o 
  -4   3   6        0.00       -1.04      1.47 o 
  -3   3   6        0.17       -0.18      0.54 o 
  -2   3   6       17.53       18.33      1.30 o 
  -1   3   6       17.70       16.15      0.76 o 
   0   3   6       48.35       54.54      1.42 o 
   1   3   6       16.78       15.78      0.63 o 
   2   3   6        3.23        0.97      0.55 o 
   3   3   6       10.69       11.98      0.93 o 
   4   3   6       16.51       13.22      1.66 o 
   5   3   6       11.06       10.62      2.41 o 
  -4   4   6        0.38        1.19      1.49 o 
  -3   4   6        0.92        0.38      0.79 o 
  -2   4   6        8.31        7.20      0.73 o 
  -1   4   6        0.04       -0.23      0.36 o 
   0   4   6       38.81       36.66      1.78 o 
   2   4   6       17.70       16.27      0.93 o 
   3   4   6        0.03       -0.18      0.83 o 
   4   4   6       43.20       41.69      2.75 o 
  -4   5   6        1.48        4.80      1.90 o 
  -3   5   6        1.99        2.80      1.19 o 
  -2   5   6        0.86        0.19      0.71 o 
  -1   5   6        3.12        2.58      1.03 o 
   0   5   6      140.07      135.79      2.56 o 
   1   5   6       27.37       22.84      1.20 o 
   2   5   6       14.98       15.29      1.23 o 
   3   5   6       11.52       12.44      1.94 o 
   4   5   6       23.63       18.73      2.22 o 
  -4   6   6        1.46        2.98      1.19 o 
  -3   6   6       20.65       21.81      1.41 o 
  -2   6   6        1.73        1.23      0.62 o 
  -1   6   6       46.94       43.23      2.26 o 
   0   6   6       24.37       21.94      1.26 o 
   1   6   6      118.40      125.44      2.66 o 
   2   6   6       17.06       18.11      2.48 o 
   3   6   6      102.77      101.91      2.75 o 
   4   6   6        1.72        0.64      1.16 o 
  -4   7   6        0.61        1.37      1.86 o 
  -3   7   6        1.09        1.36      0.95 o 
  -2   7   6        3.23        3.72      0.95 o 
  -1   7   6       27.78       28.43      2.07 o 
   0   7   6       26.90       30.58      1.53 o 
   1   7   6        6.13        7.75      1.39 o 
   2   7   6        0.05       -1.45      1.89 o 
   3   7   6       49.65       46.26      2.09 o 
   4   7   6        0.03        3.18      1.84 o 
  -3   8   6        0.07        1.69      1.43 o 
  -2   8   6        0.05        2.23      1.23 o 
  -1   8   6        1.85        2.17      1.35 o 
   0   8   6        5.22        3.69      0.89 o 
   1   8   6       31.21       31.59      4.19 o 
   2   8   6       26.22       26.27      1.65 o 
   3   8   6        5.69        4.39      1.23 o 
   4   8   6        8.14       10.65      2.27 o 
  -3   9   6        7.60        9.54      2.02 o 
  -2   9   6        8.00        6.42      1.62 o 
  -1   9   6        7.86       10.08      2.39 o 
   0   9   6        7.37        5.62      1.05 o 
   1   9   6        9.22        9.40      1.40 o 
   2   9   6        6.18        3.67      1.63 o 
   3   9   6        0.00        0.71      1.96 o 
  -3  10   6        0.19        1.71      1.67 o 
  -2  10   6        0.05       -0.98      1.28 o 
  -1  10   6        0.15       -0.32      0.83 o 
   0  10   6        0.25        1.61      0.98 o 
   1  10   6       10.09        8.74      1.33 o 
   2  10   6       25.61       25.31      1.78 o 
   3  10   6        4.05        5.68      2.22 o 
  -2  11   6        0.20       -0.25      1.62 o 
  -1  11   6        2.94        5.07      1.86 o 
   0  11   6        3.57        1.90      1.11 o 
   1  11   6        1.02       -0.13      1.07 o 
   2  11   6        9.88        6.88      1.47 o 
  -1  12   6        0.10        0.42      1.78 o 
   0  12   6        0.61        0.89      1.14 o 
   1  12   6        0.29       -0.52      1.10 o 
   0 -10   7       19.74       20.68      2.81 o 
  -1  -9   7        0.22       -0.57      1.21 o 
   0  -9   7        5.28        6.69      2.08 o 
   1  -9   7        4.22        7.29      2.11 o 
   2  -9   7        1.16        1.13      1.80 o 
  -2  -8   7        0.57        0.67      1.93 o 
  -1  -8   7       49.14       48.62      2.25 o 
   0  -8   7        2.84        0.51      1.38 o 
   1  -8   7        1.20        5.10      1.90 o 
   2  -8   7        3.77        5.12      1.28 o 
  -3  -7   7        0.51        1.14      1.26 o 
  -2  -7   7        7.20        7.72      1.40 o 
  -1  -7   7        7.94        9.09      1.35 o 
   0  -7   7       40.70       39.48      2.79 o 
   1  -7   7        6.80        6.68      1.84 o 
   2  -7   7        2.27        2.08      1.04 o 
   3  -7   7        1.14        0.87      1.24 o 
  -3  -6   7        3.88        7.16      1.39 o 
  -2  -6   7       27.86       32.67      1.85 o 
  -1  -6   7        7.36        3.07      1.92 o 
   0  -6   7       24.02       23.01      1.62 o 
   1  -6   7       19.65       23.15      1.41 o 
   2  -6   7        0.04        0.95      0.91 o 
   3  -6   7        5.29        6.19      1.32 o 
  -3  -5   7        0.99        0.70      1.84 o 
  -2  -5   7        3.17        4.29      1.72 o 
  -1  -5   7      247.92      241.67      4.09 o 
   0  -5   7       46.02       43.67      1.75 o 
   1  -5   7        8.45       12.83      2.50 o 
   2  -5   7        0.01        0.52      0.91 o 
   3  -5   7        2.71        4.43      1.20 o 
   4  -5   7        3.18        2.33      1.32 o 
  -4  -4   7        1.67        1.02      1.49 o 
  -3  -4   7        0.03       -0.99      0.88 o 
  -2  -4   7        0.18       -0.43      1.89 o 
  -1  -4   7       76.96       78.82      2.21 o 
   0  -4   7       34.39       31.47      1.50 o 
   1  -4   7        0.00       -0.38      0.61 o 
   2  -4   7       35.77       40.39      1.73 o 
   3  -4   7       10.83        8.64      1.33 o 
   4  -4   7        3.84        1.85      1.25 o 
  -4  -3   7        0.67        0.20      1.07 o 
  -3  -3   7       21.36       19.30      1.56 o 
  -2  -3   7      691.42      680.87      7.75 o 
  -1  -3   7       27.85       32.88      1.52 o 
   0  -3   7      116.80      115.05      1.74 o 
   1  -3   7        2.50        4.25      0.64 o 
   2  -3   7        1.83        1.49      0.84 o 
   3  -3   7        0.12        0.12      0.91 o 
   4  -3   7        5.94        9.13      1.39 o 
  -4  -2   7        0.26       -0.38      1.59 o 
  -3  -2   7        1.00        0.20      1.86 o 
  -2  -2   7       39.81       40.33      1.64 o 
  -1  -2   7       25.79       29.75      1.34 o 
   0  -2   7       48.36       46.09      1.14 o 
   1  -2   7      416.99      406.61      3.77 o 
   2  -2   7       31.46       34.33      1.53 o 
   3  -2   7        1.29       -0.26      2.08 o 
   4  -2   7       20.71       18.32      1.65 o 
  -4  -1   7       19.51       21.28      4.18 o 
  -3  -1   7      542.21      553.10      6.93 o 
  -2  -1   7       29.33       27.12      1.34 o 
  -1  -1   7       57.97       54.51      2.01 o 
   0  -1   7        4.86        4.36      0.50 o 
   1  -1   7        0.31        0.30      0.41 o 
   2  -1   7        0.42       -0.17      0.73 o 
   3  -1   7       17.27       21.56      1.43 o 
   4  -1   7        6.92        4.51      1.16 o 
  -4   0   7        1.93        1.80      1.72 o 
  -3   0   7       89.45       87.04      2.48 o 
  -2   0   7        0.01       -0.36      0.53 o 
  -1   0   7       16.77       20.22      0.73 o 
   0   0   7     1444.34     1597.37     10.50 o 
   1   0   7      134.57      149.13      1.94 o 
   2   0   7       18.83       18.10      0.99 o 
   3   0   7      140.19      137.41      2.94 o 
   4   0   7        8.15       10.42      1.38 o 
  -4   1   7       78.96       80.32      2.64 o 
  -3   1   7        0.05        0.85      0.70 o 
  -2   1   7        6.02        4.83      0.75 o 
  -1   1   7       51.83       47.68      1.07 o 
   0   1   7       20.96       18.91      0.72 o 
   1   1   7       10.83       12.77      0.69 o 
   2   1   7       10.42       11.39      0.78 o 
   3   1   7       59.96       55.02      1.87 o 
   4   1   7        1.27       -0.94      0.98 o 
  -4   2   7       31.48       31.70      2.71 o 
  -3   2   7        0.39       -0.42      1.32 o 
  -2   2   7       48.47       56.11      1.89 o 
  -1   2   7     1247.95     1309.66      9.51 o 
   0   2   7       47.92       57.23      1.09 o 
   1   2   7        2.81        3.07      0.46 o 
   2   2   7      242.52      242.05      3.37 o 
   3   2   7       23.33       25.20      1.39 o 
   4   2   7        3.46        2.11      1.03 o 
  -4   3   7        5.35        4.58      1.83 o 
  -3   3   7        2.70        3.33      1.39 o 
  -1   3   7        2.13        2.01      0.71 o 
   0   3   7       35.04       33.87      0.79 o 
   1   3   7        4.94        6.15      0.52 o 
   2   3   7       19.65       20.10      0.92 o 
   3   3   7        0.25       -0.16      0.66 o 
   4   3   7        5.39        3.82      1.69 o 
  -4   4   7        7.26        5.83      1.90 o 
  -3   4   7        1.10        0.36      0.79 o 
  -2   4   7      300.02      286.14      3.22 o 
  -1   4   7       23.85       23.60      0.85 o 
   0   4   7        0.35        0.96      0.55 o 
   1   4   7      508.16      513.80      5.75 o 
   2   4   7        7.73       10.77      1.17 o 
   3   4   7        0.62       -0.05      0.82 o 
   4   4   7        0.93        0.76      1.46 o 
  -3   5   7        0.09        0.69      0.77 o 
  -2   5   7       11.87       14.02      0.95 o 
  -1   5   7      210.32      216.65      3.47 o 
   0   5   7       64.59       67.79      1.90 o 
   1   5   7       34.75       29.22      2.59 o 
   2   5   7       46.88       42.30      1.77 o 
   3   5   7        5.34        4.59      1.03 o 
   4   5   7       44.84       50.39      3.00 o 
  -4   6   7        0.37        0.09      1.84 o 
  -3   6   7        7.61        7.68      1.10 o 
  -2   6   7        8.95       12.68      0.93 o 
  -1   6   7        0.70        0.30      0.72 o 
   0   6   7      136.71      153.37      2.96 o 
   1   6   7        0.41       -0.31      0.67 o 
   2   6   7        1.23        0.83      0.80 o 
   3   6   7        6.75        7.66      2.38 o 
   4   6   7        3.12        2.14      1.72 o 
  -4   7   7        0.61        1.61      1.72 o 
  -3   7   7        0.06        0.21      1.32 o 
  -2   7   7      165.35      177.59      3.43 o 
  -1   7   7        8.08        9.35      1.11 o 
   0   7   7       19.93       21.54      2.89 o 
   1   7   7        4.45        4.02      1.22 o 
   2   7   7        1.74        0.61      0.86 o 
   3   7   7       15.32       14.31      2.12 o 
   4   7   7        0.33        1.41      1.63 o 
  -3   8   7       23.00       27.80      2.48 o 
  -2   8   7        3.77        3.80      0.96 o 
  -1   8   7        4.31        2.74      0.99 o 
   0   8   7       19.19       19.00      1.39 o 
   1   8   7       12.71        8.99      1.16 o 
   2   8   7        5.66        4.34      1.15 o 
   3   8   7        0.79        1.41      1.11 o 
   4   8   7        6.74       12.07      2.39 o 
  -3   9   7       78.24       96.67      4.28 o 
  -2   9   7        4.30        2.57      1.64 o 
  -1   9   7        2.36        3.06      1.11 o 
   0   9   7        0.88        0.33      1.46 o 
   1   9   7       17.47       13.18      1.39 o 
   2   9   7        3.86        2.54      1.08 o 
   3   9   7       18.32       25.72      2.95 o 
  -2  10   7        0.10       -1.16      1.43 o 
  -1  10   7        0.10        0.35      0.87 o 
   0  10   7       33.61       32.82      1.84 o 
   1  10   7       19.19       20.86      1.70 o 
   2  10   7        2.97        3.64      1.67 o 
   3  10   7       39.98       45.67      2.94 o 
  -1  11   7       10.12       10.89      1.45 o 
   0  11   7        6.43        3.97      1.19 o 
   1  11   7        0.96        2.83      1.17 o 
   2  11   7        4.25        6.46      1.41 o 
  -1  12   7       13.27       15.82      2.69 o 
   0  12   7        7.12        5.41      1.33 o 
   1  12   7        0.96       -0.07      1.16 o 
  -1  -9   8        2.59        0.36      1.30 o 
   0  -9   8        2.16        2.11      1.84 o 
   1  -9   8        7.55        5.77      2.23 o 
  -2  -8   8        0.79        0.25      3.55 o 
  -1  -8   8        0.45        0.22      1.24 o 
   0  -8   8        0.06       -0.67      1.44 o 
   1  -8   8        2.56        4.00      1.93 o 
   2  -8   8        1.38        1.07      1.56 o 
  -2  -7   8        0.04       -0.44      1.98 o 
  -1  -7   8        1.13        0.35      1.07 o 
   0  -7   8       40.25       37.56      2.01 o 
   1  -7   8        6.33        8.12      2.10 o 
   2  -7   8        0.06        1.50      1.00 o 
   3  -7   8        0.74        0.43      1.21 o 
  -3  -6   8        1.23        2.65      1.26 o 
  -2  -6   8        1.93        2.83      1.13 o 
  -1  -6   8        2.53        2.42      1.40 o 
   0  -6   8       24.21       25.51      1.58 o 
   1  -6   8        7.98       12.89      2.04 o 
   2  -6   8        0.05       -1.05      0.89 o 
   3  -6   8        1.10        0.46      1.14 o 
  -3  -5   8        0.73        1.00      1.08 o 
  -2  -5   8        0.79        0.04      0.89 o 
  -1  -5   8      110.90      118.49      3.09 o 
   0  -5   8       20.45       20.27      1.44 o 
   1  -5   8        0.37        0.44      0.79 o 
   2  -5   8        2.02        0.02      0.98 o 
   3  -5   8        2.84        1.94      1.18 o 
  -3  -4   8       13.61       13.38      1.51 o 
  -2  -4   8       45.18       45.62      1.96 o 
  -1  -4   8      169.71      168.33      3.37 o 
   0  -4   8        5.97        6.77      1.01 o 
   1  -4   8        0.26        1.02      0.76 o 
   2  -4   8        8.07        8.53      1.23 o 
   3  -4   8        8.72        8.60      1.38 o 
   4  -4   8        0.99        1.90      1.32 o 
  -4  -3   8        1.40        0.81      1.99 o 
  -3  -3   8        2.42        2.83      1.01 o 
  -2  -3   8       88.70       84.37      2.52 o 
  -1  -3   8       85.27       79.25      2.22 o 
   0  -3   8        0.93        0.74      0.70 o 
   1  -3   8        8.06        9.38      0.81 o 
   2  -3   8        8.12        7.54      1.12 o 
   3  -3   8        1.36       -0.49      0.97 o 
   4  -3   8        0.21        0.21      1.14 o 
  -4  -2   8        0.43       -1.15      1.52 o 
  -3  -2   8       25.18       26.55      2.50 o 
  -2  -2   8      302.79      295.12      4.60 o 
  -1  -2   8        6.27        6.78      0.94 o 
   0  -2   8        1.00       -0.02      0.45 o 
   1  -2   8       12.85       15.30      0.96 o 
   2  -2   8       24.15       21.34      1.39 o 
   3  -2   8        0.26        1.38      0.95 o 
   4  -2   8        0.20       -0.64      1.24 o 
  -4  -1   8        0.13       -0.22      1.04 o 
  -3  -1   8       48.56       47.05      1.97 o 
  -2  -1   8       24.15       23.44      1.31 o 
  -1  -1   8       53.91       53.24      1.69 o 
   0  -1   8       53.16       55.24      1.21 o 
   1  -1   8        5.58        6.55      0.96 o 
   2  -1   8        1.30        2.18      1.62 o 
   3  -1   8        0.60       -0.65      0.82 o 
   4  -1   8        0.23       -0.03      1.06 o 
  -4   0   8        2.47        3.67      2.17 o 
  -3   0   8       37.72       37.80      2.85 o 
  -2   0   8        1.90        2.22      0.69 o 
   0   0   8       45.29       46.15      1.13 o 
   1   0   8        4.57        5.80      0.80 o 
   2   0   8       13.65       14.22      0.89 o 
   3   0   8        4.33        5.73      2.77 o 
   4   0   8        0.01       -0.58      0.95 o 
  -4   1   8       42.95       49.21      2.20 o 
  -3   1   8       19.67       19.09      3.12 o 
  -2   1   8       37.34       34.62      1.44 o 
  -1   1   8      140.36      145.57      1.97 o 
   0   1   8        0.39        0.97      0.40 o 
   1   1   8        9.09        9.24      1.03 o 
   2   1   8        1.13        1.32      0.55 o 
   3   1   8        1.85        0.81      0.92 o 
   4   1   8        3.05        4.13      1.14 o 
  -4   2   8        3.95        1.77      1.61 o 
  -3   2   8        6.81        7.09      1.40 o 
  -2   2   8        2.95        2.20      0.91 o 
   0   2   8       14.16       17.16      1.23 o 
   1   2   8       44.60       41.90      1.07 o 
   2   2   8        4.53        5.25      0.68 o 
   3   2   8        0.64        1.29      1.23 o 
   4   2   8        0.01       -1.98      1.52 o 
  -4   3   8        9.76        6.87      1.84 o 
  -3   3   8       12.83       11.57      1.48 o 
   0   3   8        0.45        0.48      0.39 o 
   1   3   8        0.11        0.06      0.40 o 
   2   3   8        8.39       10.01      1.04 o 
   3   3   8        7.44        6.53      2.04 o 
   4   3   8        1.85        1.87      1.65 o 
  -4   4   8        0.01        0.09      1.50 o 
  -3   4   8        4.54        2.74      1.29 o 
  -2   4   8        1.57        3.27      0.65 o 
  -1   4   8        5.57        5.37      0.62 o 
   0   4   8        0.01        0.71      0.59 o 
   1   4   8       69.55       64.35      1.88 o 
   2   4   8       20.59       19.83      1.62 o 
   3   4   8       11.12       11.35      1.25 o 
   4   4   8        7.17        6.56      1.92 o 
  -3   5   8        3.16        4.55      0.79 o 
  -2   5   8       39.50       45.34      1.66 o 
  -1   5   8       12.29       14.05      2.56 o 
   0   5   8        0.15       -0.41      0.60 o 
   1   5   8       18.89       20.21      1.26 o 
   2   5   8       13.04       12.29      1.19 o 
   3   5   8       12.30       13.80      1.35 o 
   4   5   8       10.46       14.39      2.17 o 
  -4   6   8        1.83        4.62      1.90 o 
  -3   6   8        6.88        7.05      1.62 o 
  -2   6   8        1.69       -0.13      1.01 o 
  -1   6   8       29.74       30.56      1.53 o 
   0   6   8       29.00       29.96      1.50 o 
   1   6   8       14.17       16.06      1.22 o 
   2   6   8        5.96        6.97      1.06 o 
   3   6   8        6.22        4.05      1.12 o 
   4   6   8        2.64        1.93      1.81 o 
  -3   7   8        5.00        5.66      1.69 o 
  -2   7   8       34.83       41.23      2.50 o 
  -1   7   8       70.18       71.38      2.23 o 
   0   7   8        0.64        2.47      0.80 o 
   1   7   8        6.94        7.59      1.08 o 
   2   7   8       19.27       19.00      1.54 o 
   3   7   8        2.02        2.32      1.11 o 
   4   7   8        2.53        3.99      1.34 o 
  -3   8   8        3.03        3.12      1.69 o 
  -2   8   8       44.59       52.66      2.90 o 
  -1   8   8       20.85       20.06      1.43 o 
   0   8   8        0.07        0.75      0.80 o 
   1   8   8        4.14        2.63      0.94 o 
   2   8   8       19.45       18.98      2.88 o 
   3   8   8        0.36       -0.53      1.02 o 
  -3   9   8        7.56        8.01      2.20 o 
  -1   9   8        0.01       -0.16      0.85 o 
   0   9   8        0.82        0.80      0.85 o 
   1   9   8        1.25        1.22      0.93 o 
   2   9   8        4.23        3.71      1.20 o 
   3   9   8        5.45        3.77      1.37 o 
  -2  10   8        6.87        7.37      2.17 o 
  -1  10   8       13.71       12.33      1.79 o 
   0  10   8        0.72        1.23      1.00 o 
   1  10   8        8.06        6.11      1.24 o 
   2  10   8        0.80        0.28      1.12 o 
   3  10   8        4.69        3.43      2.47 o 
  -2  11   8        0.36        4.18      2.22 o 
  -1  11   8        1.25        1.03      1.02 o 
   0  11   8        1.08        2.40      1.72 o 
   1  11   8        1.38        0.06      1.01 o 
   2  11   8        0.56        0.47      1.19 o 
  -1  12   8        0.05       -1.22      1.83 o 
   0  12   8        4.09        4.73      1.32 o 
   1  12   8        1.31        0.82      1.20 o 
  -1  -8   9        0.96       -0.13      1.24 o 
   0  -8   9        1.22        0.79      1.72 o 
   1  -8   9       16.45       24.67      3.00 o 
   2  -8   9        0.87        1.17      1.71 o 
  -2  -7   9        4.01        4.93      1.44 o 
  -1  -7   9        0.25       -0.98      1.06 o 
   0  -7   9        0.05        0.85      1.53 o 
   1  -7   9       14.62       12.76      2.23 o 
   2  -7   9        0.52       -1.00      1.53 o 
  -2  -6   9        0.03        1.99      1.63 o 
  -1  -6   9        0.00       -1.10      0.96 o 
   0  -6   9       99.84      103.19      2.84 o 
   1  -6   9        4.89        5.65      1.78 o 
   2  -6   9        0.82        3.60      1.15 o 
   3  -6   9        0.48        1.32      1.27 o 
  -3  -5   9        0.68       -0.28      1.09 o 
  -2  -5   9       16.99       14.26      1.51 o 
  -1  -5   9        8.29       10.62      1.42 o 
   0  -5   9       31.78       26.83      1.74 o 
   1  -5   9        2.56        1.78      1.25 o 
   2  -5   9        0.45       -0.93      0.90 o 
   3  -5   9        8.33        8.62      3.17 o 
  -3  -4   9        1.71        1.14      2.06 o 
  -2  -4   9       21.69       20.94      1.63 o 
  -1  -4   9      326.26      336.93      5.16 o 
   0  -4   9        6.48        5.95      1.02 o 
   1  -4   9        3.44        4.11      0.94 o 
   2  -4   9        4.63        7.09      1.19 o 
   3  -4   9        0.05       -0.26      1.55 o 
  -3  -3   9        1.84        0.57      0.97 o 
  -2  -3   9        2.55        1.63      1.20 o 
  -1  -3   9       29.14       28.33      1.54 o 
   0  -3   9        9.27        8.31      1.02 o 
   1  -3   9        0.37        0.30      0.58 o 
   2  -3   9       70.61       70.35      2.44 o 
   3  -3   9        3.75        3.68      2.82 o 
   4  -3   9        0.07       -0.54      1.17 o 
  -4  -2   9        0.72        1.07      1.29 o 
  -3  -2   9       10.77       11.17      1.35 o 
  -2  -2   9      292.77      293.83      4.79 o 
  -1  -2   9       22.48       22.80      1.31 o 
   0  -2   9        6.57        6.76      0.69 o 
   1  -2   9       14.81       19.18      1.00 o 
   2  -2   9        0.01       -0.50      0.86 o 
   3  -2   9        1.28        0.14      2.12 o 
   4  -2   9        1.48        1.33      1.19 o 
  -4  -1   9        0.80       -1.21      1.08 o 
  -3  -1   9        0.07        0.34      1.72 o 
  -2  -1   9       98.55       87.95      2.40 o 
  -1  -1   9        4.60        3.63      1.03 o 
   0  -1   9       17.11       15.77      0.93 o 
   1  -1   9      289.38      301.08      3.30 o 
   2  -1   9       15.53       17.01      2.20 o 
   3  -1   9        1.44        2.53      1.07 o 
   4  -1   9       16.48       12.16      2.97 o 
  -4   0   9        0.37        2.98      1.19 o 
  -3   0   9       18.71       16.18      1.46 o 
  -2   0   9        0.23       -0.63      0.58 o 
  -1   0   9       40.82       43.27      1.56 o 
   0   0   9       32.29       31.80      1.06 o 
   1   0   9        0.15       -0.56      0.50 o 
   2   0   9       22.39       22.02      2.44 o 
   3   0   9        0.00       -0.61      0.83 o 
   4   0   9        4.41        3.30      1.20 o 
  -4   1   9        0.39       -0.26      1.45 o 
  -3   1   9       32.09       30.85      1.61 o 
  -2   1   9        9.33        7.69      1.01 o 
  -1   1   9        0.52        0.02      0.44 o 
   0   1   9      463.79      491.27      4.62 o 
   1   1   9       10.21       10.86      0.79 o 
   2   1   9        0.03       -0.26      0.54 o 
   3   1   9       26.93       24.98      1.74 o 
   4   1   9        0.10       -0.02      1.05 o 
  -4   2   9        1.15       -0.27      1.03 o 
  -3   2   9        8.06        5.32      1.00 o 
  -2   2   9       10.84        9.18      1.01 o 
  -1   2   9        0.55       -0.41      0.42 o 
   0   2   9       11.90       10.66      0.71 o 
   1   2   9      296.30      275.14      2.98 o 
   2   2   9        4.83        5.46      0.77 o 
   3   2   9        0.00        0.36      1.28 o 
   4   2   9        0.22       -0.34      1.62 o 
  -4   3   9        2.16        0.58      1.59 o 
  -3   3   9       45.36       45.40      1.88 o 
  -2   3   9       11.18       12.66      0.88 o 
  -1   3   9      186.71      171.97      2.32 o 
   0   3   9        1.46        1.47      0.85 o 
   1   3   9        1.39        1.31      0.68 o 
   2   3   9       52.67       50.26      1.78 o 
   3   3   9        4.21        5.53      1.55 o 
   4   3   9        1.12       -0.94      1.55 o 
  -4   4   9        0.25       -1.67      1.55 o 
  -3   4   9        0.87        1.41      1.29 o 
  -2   4   9       15.17       16.37      0.99 o 
  -1   4   9        4.71        4.52      0.87 o 
   0   4   9      661.53      632.11      6.95 o 
   1   4   9       44.85       41.40      1.62 o 
   2   4   9       24.33       23.18      1.40 o 
   3   4   9        1.42        0.85      0.89 o 
   4   4   9        3.85        3.26      1.78 o 
  -4   5   9        7.32        7.84      2.17 o 
  -3   5   9        4.60        3.08      1.26 o 
  -2   5   9        0.04        0.42      0.75 o 
  -1   5   9       75.21       75.10      3.18 o 
   0   5   9        5.76        5.51      0.92 o 
   1   5   9        9.67       14.61      1.24 o 
   2   5   9       18.21       17.60      1.54 o 
   3   5   9        6.60        6.54      1.15 o 
   4   5   9        2.17        2.80      1.81 o 
  -3   6   9        0.02       -1.84      1.28 o 
  -2   6   9        4.40        4.81      1.06 o 
  -1   6   9      463.43      476.99     10.82 o 
   0   6   9        0.20       -0.01      0.75 o 
   1   6   9       20.38       22.91      1.40 o 
   2   6   9        4.90        3.09      0.95 o 
   3   6   9        6.08        5.41      2.59 o 
   4   6   9        0.14       -0.91      1.62 o 
  -3   7   9        0.00       -0.09      1.50 o 
  -2   7   9       89.55       94.37      2.74 o 
  -1   7   9       25.64       24.34      2.71 o 
   0   7   9        0.00       -0.56      0.69 o 
   1   7   9       21.67       20.85      1.43 o 
   2   7   9       27.56       26.19      1.92 o 
   3   7   9        6.08        6.68      1.30 o 
   4   7   9        0.33        2.93      2.10 o 
  -3   8   9        5.33        6.30      2.07 o 
  -2   8   9      209.58      245.95      4.57 o 
  -1   8   9        0.52        0.51      0.94 o 
   0   8   9        3.02        1.68      0.91 o 
   1   8   9       15.28       10.73      1.28 o 
   2   8   9       18.83       15.05      2.01 o 
   3   8   9        0.13       -0.71      1.13 o 
  -2   9   9        6.53        9.05      2.24 o 
  -1   9   9        0.06        1.90      1.20 o 
   0   9   9        1.68        1.93      0.93 o 
   1   9   9       49.76       45.72      2.07 o 
   2   9   9       19.22       17.08      1.63 o 
   3   9   9        0.02       -0.52      1.22 o 
  -2  10   9        0.07        0.42      1.98 o 
  -1  10   9        1.63        2.42      1.02 o 
   0  10   9       24.85       22.89      1.71 o 
   1  10   9        9.05        5.00      2.58 o 
   2  10   9        0.31        0.74      1.90 o 
  -1  11   9        0.00        2.23      1.10 o 
   0  11   9       26.37       24.23      1.84 o 
   1  11   9        5.66        4.24      1.28 o 
   2  11   9        0.76        0.13      1.38 o 
   0  12   9        2.23        1.02      1.24 o 
   1  12   9        0.80        1.71      1.31 o 
   0  -8  10        0.17        1.23      1.86 o 
   1  -8  10       25.88       31.52      3.42 o 
  -1  -7  10        0.13       -0.17      1.20 o 
   0  -7  10        0.72       -0.43      1.41 o 
   1  -7  10       29.70       38.67      3.24 o 
   2  -7  10        3.55        1.04      1.80 o 
  -2  -6  10        0.23       -0.97      1.46 o 
  -1  -6  10        3.03        2.11      1.14 o 
   0  -6  10       85.09       91.37      2.82 o 
   1  -6  10       21.41       28.35      2.63 o 
   2  -6  10        0.29       -0.86      1.49 o 
  -2  -5  10        3.94        5.36      1.27 o 
  -1  -5  10       28.98       29.37      1.93 o 
   0  -5  10      148.18      153.39      3.78 o 
   1  -5  10        5.21        5.22      1.69 o 
   2  -5  10        0.01       -0.01      1.03 o 
   3  -5  10        5.18        6.07      1.52 o 
  -3  -4  10        0.17        0.71      1.54 o 
  -2  -4  10        0.18        1.06      1.09 o 
  -1  -4  10       97.51       98.31      2.83 o 
   0  -4  10       55.02       57.35      2.06 o 
   1  -4  10        0.23        0.48      1.29 o 
   2  -4  10        0.90        1.52      1.01 o 
   3  -4  10        0.03        1.92      1.61 o 
  -3  -3  10        0.09       -1.45      0.97 o 
  -2  -3  10       22.64       20.20      1.60 o 
  -1  -3  10      225.85      232.35      4.20 o 
   0  -3  10        2.49        1.81      0.75 o 
   1  -3  10        3.16        5.34      1.00 o 
   2  -3  10       20.11       23.32      1.75 o 
   3  -3  10        3.72        2.94      1.34 o 
  -3  -2  10        0.10        0.03      0.99 o 
  -2  -2  10       66.78       66.19      2.30 o 
  -1  -2  10       24.38       25.96      1.47 o 
   0  -2  10        0.67        0.41      0.69 o 
   1  -2  10       17.36       17.32      1.03 o 
   2  -2  10        1.94        1.00      0.97 o 
   3  -2  10        1.00        0.67      1.72 o 
   4  -2  10        2.71        3.29      1.36 o 
  -3  -1  10        3.88        4.51      1.08 o 
  -2  -1  10       20.90       16.64      1.38 o 
  -1  -1  10       17.37       14.35      1.21 o 
   0  -1  10       16.09       15.99      1.09 o 
   1  -1  10       43.34       44.55      1.35 o 
   2  -1  10        2.03        1.76      1.51 o 
   3  -1  10        3.14        4.79      1.60 o 
   4  -1  10        0.71        1.09      2.29 o 
  -4   0  10        0.20        2.19      1.21 o 
  -3   0  10       56.14       58.17      2.21 o 
  -2   0  10       31.51       26.97      1.47 o 
  -1   0  10        7.47        6.79      1.31 o 
   0   0  10       64.96       65.24      1.46 o 
   1   0  10       14.18       17.69      1.02 o 
   2   0  10       22.10       21.98      1.57 o 
   3   0  10        9.92       10.49      1.32 o 
   4   0  10        0.02        1.31      1.19 o 
  -4   1  10        2.34        1.08      1.15 o 
  -3   1  10        0.91        0.45      0.81 o 
  -2   1  10       50.99       43.51      1.73 o 
  -1   1  10       11.52       14.05      1.12 o 
   0   1  10       12.06       14.55      0.87 o 
   1   1  10        5.97        7.73      0.80 o 
   2   1  10        1.78        1.72      0.75 o 
   3   1  10        3.04        0.56      1.40 o 
   4   1  10        0.00       -0.15      1.81 o 
  -4   2  10        3.69        2.16      1.18 o 
  -3   2  10       17.32       17.27      2.04 o 
  -2   2  10      131.97      119.06      2.71 o 
  -1   2  10        2.87        4.65      0.61 o 
   0   2  10        8.42        9.34      0.76 o 
   1   2  10       91.06       94.56      2.32 o 
   2   2  10       47.98       46.02      1.79 o 
   3   2  10        0.65       -0.25      1.32 o 
   4   2  10        0.45        2.19      1.80 o 
  -4   3  10        0.09        0.59      1.55 o 
  -3   3  10       10.30       10.36      1.24 o 
  -2   3  10        2.55        2.08      0.82 o 
  -1   3  10        0.56       -0.27      0.88 o 
   0   3  10        0.00        0.00      1.46 o 
   1   3  10       14.71       15.20      2.01 o 
   2   3  10       20.05       19.49      1.95 o 
   3   3  10        0.41       -0.64      1.23 o 
   4   3  10        0.24       -0.65      1.67 o 
  -3   4  10       38.27       35.41      2.45 o 
  -2   4  10        2.42        0.93      0.84 o 
  -1   4  10       57.65       53.39      1.86 o 
   0   4  10      344.54      330.43      4.68 o 
   1   4  10      145.27      136.05      2.90 o 
   2   4  10        0.13       -0.75      1.25 o 
   3   4  10        0.01       -0.54      0.83 o 
   4   4  10        7.12        4.33      1.90 o 
  -3   5  10        0.08        0.33      1.16 o 
  -2   5  10       12.20       12.11      1.51 o 
  -1   5  10       14.79       16.96      1.39 o 
   0   5  10       66.35       64.54      2.10 o 
   1   5  10       10.78       12.93      1.24 o 
   2   5  10        1.01        0.61      0.84 o 
   3   5  10        0.53       -0.40      1.17 o 
   4   5  10        6.39        6.26      1.98 o 
  -3   6  10        0.64       -0.85      1.29 o 
  -2   6  10       10.07       11.81      1.94 o 
  -1   6  10      344.88      364.07      5.40 o 
   0   6  10      304.85      285.37      5.34 o 
   1   6  10        1.01        0.34      0.80 o 
   2   6  10        5.67        5.55      1.09 o 
   3   6  10       11.53        9.38      1.36 o 
   4   6  10        0.71       -0.33      1.86 o 
  -3   7  10        0.08        0.73      1.62 o 
  -2   7  10        9.57        9.22      1.37 o 
  -1   7  10       83.62       89.28      5.04 o 
   0   7  10       15.82       14.59      2.45 o 
   1   7  10       18.55       15.89      1.78 o 
   2   7  10        3.90        2.11      1.02 o 
   3   7  10       15.10       15.14      1.57 o 
  -3   8  10        1.22        0.82      1.98 o 
  -2   8  10       73.48       86.47      2.82 o 
  -1   8  10       54.69       50.43      2.11 o 
   0   8  10        0.15        1.20      0.87 o 
   1   8  10        0.03       -0.86      0.81 o 
   2   8  10        3.72        1.76      1.09 o 
   3   8  10        3.34        3.31      1.27 o 
  -2   9  10        1.26        1.03      1.58 o 
  -1   9  10        4.33        4.02      1.10 o 
   0   9  10       45.10       39.29      2.28 o 
   1   9  10        6.15        3.75      1.11 o 
   2   9  10        9.96        6.32      1.29 o 
   3   9  10        0.95        2.94      2.76 o 
  -1  10  10        0.24        0.34      1.01 o 
   0  10  10        0.16        0.47      0.94 o 
   1  10  10        1.67        0.26      1.35 o 
   2  10  10        2.03        1.13      1.12 o 
  -1  11  10        0.53        2.22      1.19 o 
   0  11  10        1.00        1.54      1.14 o 
   1  11  10        5.99        4.95      1.82 o 
  -1  -7  11        0.01        0.03      1.76 o 
   0  -7  11        0.01        3.05      1.93 o 
   1  -7  11        7.86        9.98      2.50 o 
  -1  -6  11        9.61        9.63      1.51 o 
   0  -6  11       13.01       13.53      2.30 o 
   1  -6  11        5.36        6.17      1.99 o 
   2  -6  11        0.17        0.01      1.72 o 
  -2  -5  11        0.58       -0.07      1.07 o 
   0  -5  11       29.44       28.82      2.36 o 
   1  -5  11        0.07       -0.31      1.43 o 
   2  -5  11        0.27        0.06      1.43 o 
  -2  -4  11        0.67        0.17      1.00 o 
  -1  -4  11        9.87       10.54      1.44 o 
   0  -4  11        9.32        7.27      1.23 o 
   1  -4  11        1.24       -0.71      1.34 o 
   2  -4  11        4.52        5.89      1.90 o 
   3  -4  11        2.71        4.21      1.37 o 
  -3  -3  11        1.82       -0.07      1.41 o 
  -2  -3  11        0.20        0.76      0.93 o 
  -1  -3  11       17.37       19.60      1.61 o 
   0  -3  11        0.59       -0.02      0.77 o 
   1  -3  11        9.94       12.31      1.92 o 
   2  -3  11        4.96        3.12      1.16 o 
   3  -3  11        0.15       -1.02      1.34 o 
  -3  -2  11        0.47       -0.13      0.90 o 
  -2  -2  11        2.05        2.48      0.95 o 
  -1  -2  11       48.75       44.15      1.89 o 
   0  -2  11        0.34       -0.20      0.65 o 
   1  -2  11       16.58       20.50      1.15 o 
   2  -2  11       13.61       17.33      1.52 o 
   3  -2  11        0.32       -0.12      1.19 o 
  -3  -1  11        4.56        5.46      1.16 o 
  -2  -1  11       10.17       12.06      1.24 o 
  -1  -1  11        6.10        4.29      1.14 o 
   0  -1  11       11.29       13.46      1.59 o 
   1  -1  11        4.92        5.44      0.78 o 
   2  -1  11        0.53        1.48      0.99 o 
   4  -1  11        0.26        1.03      2.22 o 
  -3   0  11        4.17        4.97      1.14 o 
  -2   0  11       14.08        9.37      2.10 o 
  -1   0  11        3.00        1.02      1.54 o 
   0   0  11        3.73        3.62      0.66 o 
   1   0  11       32.14       35.80      1.60 o 
   2   0  11        0.04       -0.65      1.61 o 
   3   0  11        1.87        1.13      1.07 o 
   4   0  11        0.90        1.53      1.90 o 
  -3   1  11        2.73        2.34      0.96 o 
  -2   1  11       10.11        7.64      1.05 o 
  -1   1  11       22.88       20.36      1.31 o 
   0   1  11       10.59        9.42      0.82 o 
   1   1  11        0.81        0.65      0.63 o 
   2   1  11      108.92      106.11      3.87 o 
   3   1  11        1.97        3.24      1.65 o 
   4   1  11        0.10        2.96      2.07 o 
  -3   2  11        0.07        0.25      0.81 o 
  -2   2  11       32.20       29.50      1.52 o 
  -1   2  11        8.98       10.26      1.09 o 
   0   2  11        8.67        7.00      0.96 o 
   1   2  11        9.90       10.69      1.21 o 
   2   2  11        2.23        0.38      0.88 o 
   3   2  11        1.06       -0.68      1.41 o 
   4   2  11        0.42        2.39      1.98 o 
  -3   3  11        0.05        1.02      1.23 o 
  -2   3  11        1.66        1.30      0.75 o 
  -1   3  11       27.60       27.80      1.42 o 
   0   3  11       30.18       27.61      1.45 o 
   1   3  11      225.29      220.69      3.79 o 
   2   3  11        2.81        2.14      0.88 o 
   3   3  11        5.30        4.98      1.75 o 
   4   3  11        0.08       -1.07      1.84 o 
  -3   4  11        0.83        4.04      1.58 o 
  -2   4  11        0.41        0.79      1.16 o 
  -1   4  11       21.07       19.15      1.32 o 
   0   4  11      129.06      127.18      2.94 o 
   1   4  11        0.09       -0.17      0.82 o 
   2   4  11        0.10        0.45      0.85 o 
   3   4  11        0.28        0.62      1.43 o 
   4   4  11        2.47        3.52      1.98 o 
  -3   5  11        2.00        2.10      1.49 o 
  -2   5  11        0.00       -0.59      0.81 o 
  -1   5  11        0.25       -0.35      0.84 o 
   0   5  11      203.66      201.21      6.51 o 
   1   5  11        5.53        7.58      1.11 o 
   2   5  11        6.39        7.04      1.49 o 
   3   5  11        3.82        5.64      1.93 o 
   4   5  11        1.07        2.82      1.95 o 
  -3   6  11        5.50        4.91      1.69 o 
  -2   6  11        0.13        0.27      1.72 o 
  -1   6  11      111.76      114.95      3.00 o 
   0   6  11        3.26        1.36      0.94 o 
   1   6  11        2.26        1.35      0.90 o 
   2   6  11        1.41        0.57      1.91 o 
   3   6  11        9.36       10.18      1.44 o 
  -2   7  11        0.74        2.07      1.04 o 
  -1   7  11      140.94      145.67      3.47 o 
   0   7  11        0.30        1.42      0.88 o 
   1   7  11        1.40       -0.70      1.01 o 
   2   7  11        8.35        6.43      1.21 o 
   3   7  11        4.22        4.91      1.30 o 
  -2   8  11        7.80        9.35      1.44 o 
  -1   8  11       31.99       34.45      1.96 o 
   0   8  11        4.19        4.56      1.13 o 
   1   8  11       21.35       17.95      1.62 o 
   2   8  11       21.10       21.00      1.81 o 
   3   8  11        2.62        3.30      2.04 o 
  -2   9  11       15.64       13.43      1.62 o 
  -1   9  11        0.13        0.98      1.09 o 
   0   9  11        0.42       -0.24      0.89 o 
   1   9  11       13.01        9.06      2.39 o 
   2   9  11        3.87        1.58      1.52 o 
  -1  10  11        0.00        0.00      1.14 o 
   0  10  11        0.06        0.62      1.00 o 
   1  10  11       23.22       20.37      3.33 o 
   2  10  11        0.02       -0.17      1.39 o 
  -1  11  11        5.41        3.75      1.37 o 
   0  11  11        3.09        3.59      1.23 o 
   1  11  11        1.90        0.79      1.21 o 
  -1  -6  12        2.02        2.17      1.34 o 
   0  -6  12        3.48        0.49      1.64 o 
   1  -6  12       27.85       26.79      3.08 o 
  -1  -5  12        0.27       -0.49      1.11 o 
   0  -5  12       23.07       20.77      2.56 o 
   1  -5  12        2.90        2.10      1.74 o 
   2  -5  12        1.82       -1.28      1.55 o 
  -2  -4  12        0.22       -0.73      1.09 o 
  -1  -4  12        1.69       -0.52      1.00 o 
   0  -4  12       29.83       24.72      1.76 o 
   1  -4  12        0.12        1.95      1.50 o 
   2  -4  12        0.39        0.79      1.74 o 
  -2  -3  12        0.17        0.89      1.01 o 
  -1  -3  12       10.49        9.01      1.35 o 
   0  -3  12        0.02       -0.12      0.81 o 
   1  -3  12        6.39        6.11      1.71 o 
   2  -3  12        0.10       -0.07      1.02 o 
   3  -3  12        1.72        2.47      1.43 o 
  -3  -2  12        5.16        7.12      1.38 o 
  -2  -2  12        0.01        0.94      0.91 o 
  -1  -2  12        1.29        2.97      0.94 o 
   0  -2  12       32.82       35.16      2.05 o 
   1  -2  12        0.04        1.06      1.19 o 
   2  -2  12        2.32        1.09      1.06 o 
   3  -2  12        0.84        0.10      1.99 o 
  -3  -1  12        0.19        0.26      0.97 o 
  -2  -1  12        8.42        7.91      1.12 o 
  -1  -1  12        3.39        2.07      0.86 o 
   0  -1  12       46.32       37.29      3.81 o 
   1  -1  12        2.86        3.35      0.78 o 
   2  -1  12        5.64        5.07      1.20 o 
   3  -1  12       19.02       20.90      1.89 o 
  -3   0  12        1.08        1.49      1.00 o 
  -2   0  12        4.54        4.63      1.00 o 
  -1   0  12       92.76       80.74      2.36 o 
   0   0  12       36.14       36.26      1.60 o 
   1   0  12        2.15        2.07      0.70 o 
   3   0  12        0.20        0.98      1.83 o 
  -3   1  12        1.43        2.08      1.04 o 
  -2   1  12        5.09        5.58      1.02 o 
  -1   1  12      169.62      147.66      3.13 o 
   0   1  12        0.70        1.40      0.65 o 
   1   1  12        0.10       -1.15      0.77 o 
   2   1  12      116.40      124.66      4.28 o 
   3   1  12       44.38       48.65      3.24 o 
  -3   2  12        1.70        1.21      0.95 o 
  -2   2  12       42.24       39.19      2.32 o 
  -1   2  12       21.15       20.70      2.33 o 
   0   2  12        6.82        4.88      1.01 o 
   1   2  12        8.31        8.01      2.17 o 
   2   2  12        9.28        8.16      1.27 o 
   3   2  12        4.20        5.23      1.81 o 
  -3   3  12        0.11        0.89      1.49 o 
  -2   3  12       41.17       35.50      2.60 o 
  -1   3  12        0.24       -0.52      1.13 o 
   0   3  12       46.93       48.67      1.88 o 
   1   3  12      414.99      437.36      5.93 o 
   2   3  12      129.29      129.41      3.08 o 
   3   3  12        0.02       -2.19      1.46 o 
  -3   4  12       30.39       38.89      3.05 o 
  -2   4  12        4.19        1.96      1.44 o 
  -1   4  12        2.83        1.69      0.88 o 
   0   4  12        1.99        1.17      0.92 o 
   1   4  12       34.77       41.22      1.92 o 
   2   4  12        1.30        2.22      0.98 o 
   3   4  12        0.66       -1.74      1.49 o 
  -3   5  12        4.11        2.68      1.59 o 
  -2   5  12        7.00        8.43      1.81 o 
  -1   5  12        7.77        7.20      1.15 o 
   0   5  12      434.72      446.70      6.25 o 
   1   5  12      197.06      190.80      4.87 o 
   2   5  12        0.33        1.53      0.93 o 
   3   5  12        0.14       -1.35      1.56 o 
  -3   6  12        1.90        4.50      1.71 o 
  -2   6  12        0.51        0.21      0.96 o 
  -1   6  12        3.62        6.18      1.21 o 
   0   6  12       46.08       47.76      2.10 o 
   1   6  12        0.90        0.87      0.91 o 
   2   6  12        7.09        7.79      1.27 o 
   3   6  12        7.13        7.14      1.94 o 
  -2   7  12        1.19       -0.08      0.99 o 
  -1   7  12       92.69       97.23      2.94 o 
   0   7  12       22.06       20.77      1.66 o 
   1   7  12        2.33        3.10      1.04 o 
   2   7  12        2.85        2.73      1.04 o 
   3   7  12        1.73        1.87      1.41 o 
  -2   8  12        0.78        0.27      1.13 o 
  -1   8  12        0.48        0.23      1.96 o 
   0   8  12        3.60        4.03      1.64 o 
   1   8  12       10.23        7.34      3.11 o 
   2   8  12        9.55        8.64      3.17 o 
   3   8  12        3.57        1.42      1.33 o 
  -2   9  12       16.50       15.96      1.81 o 
  -1   9  12        0.01        2.34      1.18 o 
   0   9  12        1.44        1.85      1.09 o 
   1   9  12        0.04       -0.10      0.97 o 
   2   9  12        0.17        1.58      1.18 o 
  -1  10  12       26.50       34.25      2.30 o 
   0  10  12        6.97        8.76      1.47 o 
   1  10  12        0.90        0.68      1.18 o 
   0  -5  13        3.53        6.17      1.87 o 
   1  -5  13        0.58        3.18      1.68 o 
  -1  -4  13        4.94        7.09      1.61 o 
   0  -4  13        0.01        0.43      1.04 o 
   1  -4  13        0.00        1.06      1.56 o 
   2  -4  13        1.53        4.49      1.78 o 
  -2  -3  13        0.02       -0.55      1.61 o 
  -1  -3  13        1.77        2.29      1.05 o 
   0  -3  13        7.12        9.35      1.29 o 
   1  -3  13        0.92        1.59      1.52 o 
   2  -3  13        0.16        3.51      1.81 o 
  -2  -2  13        7.33        6.41      1.23 o 
  -1  -2  13        8.50        9.03      1.32 o 
   0  -2  13        2.12        1.96      0.88 o 
   1  -2  13        0.69        2.57      1.38 o 
   2  -2  13        0.75       -1.46      1.07 o 
   3  -2  13        0.17       -1.35      1.98 o 
  -2  -1  13        5.18        3.95      1.64 o 
  -1  -1  13        0.72        1.26      0.82 o 
   0  -1  13        2.45        3.25      0.89 o 
   1  -1  13        2.97        4.31      1.41 o 
   2  -1  13        2.52        3.17      1.55 o 
   3  -1  13        0.11       -2.27      1.99 o 
  -2   0  13        0.21        0.69      0.81 o 
  -1   0  13        2.52        2.65      1.45 o 
   0   0  13        7.87       11.75      1.80 o 
   1   0  13        2.77        1.30      0.90 o 
   2   0  13        4.45        5.55      1.86 o 
   3   0  13        7.93       10.62      2.47 o 
  -3   1  13        0.12        0.48      1.03 o 
  -2   1  13        0.66        0.94      0.82 o 
  -1   1  13        0.00        0.12      1.37 o 
   0   1  13        4.34        3.14      1.52 o 
   1   1  13        0.32       -0.89      0.84 o 
   2   1  13        3.88        3.45      1.74 o 
   3   1  13        8.47       10.10      2.29 o 
  -3   2  13        0.08       -0.31      1.52 o 
  -2   2  13        1.14        4.73      1.58 o 
  -1   2  13        1.05        1.74      1.43 o 
   0   2  13        3.69        3.36      0.97 o 
   1   2  13       35.03       38.38      1.82 o 
   2   2  13        9.45        7.08      1.95 o 
   3   2  13        1.16        4.15      1.87 o 
  -3   3  13        0.02        2.32      1.71 o 
  -2   3  13       12.90       18.00      2.32 o 
  -1   3  13       11.24        9.63      1.92 o 
   0   3  13        8.12        9.92      1.21 o 
   1   3  13       39.81       44.83      2.04 o 
   2   3  13        9.98       12.54      1.42 o 
   3   3  13        0.00       -0.43      1.67 o 
  -3   4  13        0.02        4.16      1.86 o 
  -2   4  13        9.70       10.20      1.95 o 
  -1   4  13        3.91        3.85      1.43 o 
   0   4  13       12.94       13.22      1.38 o 
   1   4  13        9.44       10.60      1.41 o 
   2   4  13        7.15        8.08      1.60 o 
   3   4  13        1.28        0.33      1.72 o 
  -2   5  13       17.93       18.44      2.42 o 
  -1   5  13        1.87        1.26      0.96 o 
   0   5  13       30.45       28.04      3.31 o 
   1   5  13        7.39        8.10      1.33 o 
   2   5  13        2.68        2.49      1.38 o 
   3   5  13        5.77        5.65      2.13 o 
  -2   6  13        0.24        0.24      1.43 o 
  -1   6  13        6.25        6.76      1.24 o 
   0   6  13       19.88       21.17      1.77 o 
   1   6  13        0.23       -0.49      1.31 o 
   2   6  13        0.28        0.79      1.04 o 
   3   6  13        0.69        3.26      2.67 o 
  -2   7  13        1.46       -0.27      1.44 o 
  -1   7  13        0.03        1.33      1.01 o 
   0   7  13       55.35       54.58      2.82 o 
   1   7  13        2.81        3.29      1.17 o 
   2   7  13       10.29       10.14      1.49 o 
  -2   8  13        8.64        9.49      1.55 o 
  -1   8  13        0.37       -0.43      1.08 o 
   0   8  13        0.04       -0.48      0.98 o 
   1   8  13        0.03       -0.26      1.02 o 
   2   8  13        2.31        1.28      1.22 o 
  -1   9  13       22.52       26.94      2.15 o 
   0   9  13        0.48        0.06      1.26 o 
   1   9  13        2.42        1.45      2.53 o 
   2   9  13       10.42        7.92      1.56 o 
   0  10  13        6.83        4.23      2.29 o 
   1  10  13        0.44        0.91      1.26 o 
   0  -4  14        0.00        1.20      1.49 o 
   1  -4  14        2.24        6.10      1.83 o 
  -1  -3  14        0.00        0.21      1.19 o 
   0  -3  14        7.76        8.59      1.31 o 
   1  -3  14       19.96       20.77      2.42 o 
  -1  -2  14        0.01       -0.06      0.89 o 
   0  -2  14        0.53        1.27      0.89 o 
   1  -2  14       15.59       14.84      2.08 o 
   2  -2  14        0.01        3.67      1.84 o 
  -2  -1  14        1.40        0.92      0.92 o 
  -1  -1  14        8.55        7.84      1.22 o 
   0  -1  14       53.09       48.55      2.03 o 
   1  -1  14        7.40        7.18      1.61 o 
   2  -1  14        2.47        0.56      1.77 o 
  -2   0  14        3.67        2.77      1.01 o 
  -1   0  14        0.02        1.38      0.96 o 
   0   0  14       40.88       35.34      2.78 o 
   1   0  14        0.57        1.22      1.25 o 
   2   0  14        0.21        1.22      1.68 o 
  -2   1  14        3.65        2.60      1.53 o 
   0   1  14        1.67        1.69      1.47 o 
   1   1  14        3.40        0.31      2.03 o 
   2   1  14       12.79       11.17      2.22 o 
   3   1  14        2.22        2.36      2.17 o 
  -2   2  14        0.88        3.46      1.68 o 
  -1   2  14        2.27        1.43      1.47 o 
   0   2  14        0.29        0.06      1.38 o 
   1   2  14       13.06       15.17      1.53 o 
   2   2  14      104.81      118.29      4.56 o 
   3   2  14       16.31       13.93      2.56 o 
  -2   3  14       27.69       26.17      2.82 o 
  -1   3  14        0.30       -0.70      1.41 o 
   0   3  14        1.49        3.56      1.08 o 
   1   3  14        1.45        0.96      1.05 o 
   2   3  14        8.74       10.14      1.44 o 
   3   3  14        0.01        0.16      1.92 o 
  -2   4  14        0.43        2.54      1.61 o 
  -1   4  14        7.54        8.55      1.87 o 
   0   4  14        0.69        0.38      2.08 o 
   1   4  14       96.38       97.74      4.13 o 
   2   4  14       16.00       13.92      1.59 o 
   3   4  14        1.59        2.07      1.95 o 
  -2   5  14        0.07       -1.04      1.52 o 
  -1   5  14        0.08       -0.62      1.34 o 
   0   5  14        0.00        0.25      0.97 o 
   1   5  14       11.29       14.80      1.62 o 
   2   5  14        2.48        1.73      1.98 o 
  -2   6  14        0.45       -1.12      1.43 o 
  -1   6  14        0.00        0.13      1.73 o 
   0   6  14        7.21        3.82      1.69 o 
   1   6  14        2.54        2.47      1.20 o 
   2   6  14        3.80        3.84      1.29 o 
  -1   7  14        0.75        0.99      1.14 o 
   0   7  14        2.34        3.94      1.59 o 
   1   7  14       27.73       34.39      2.05 o 
   2   7  14        0.85        1.62      1.30 o 
  -1   8  14        0.40       -0.50      1.14 o 
   0   8  14        9.81        8.28      1.92 o 
   1   8  14        2.50        3.53      1.79 o 
   2   8  14        1.06        1.28      1.75 o 
   0   9  14       66.40       73.37      2.91 o 
   1   9  14       20.54       21.42      4.51 o 
   0  -2  15        0.00        0.24      0.94 o 
   1  -2  15        3.02        4.77      1.72 o 
  -1  -1  15        1.56        2.40      1.04 o 
  -1   0  15        0.06        0.95      1.25 o 
   1   0  15        7.10        6.21      1.92 o 
   2   0  15        1.99        1.38      1.90 o 
  -1   1  15        2.85        3.78      1.64 o 
   0   1  15        4.39        2.53      1.65 o 
   1   1  15        0.02       -2.14      1.43 o 
   2   1  15       12.60       15.83      2.39 o 
  -2   2  15        0.69        2.99      1.71 o 
  -1   2  15       12.66       15.52      2.45 o 
   0   2  15        8.88        8.47      2.07 o 
   1   2  15        0.33        0.22      1.05 o 
   2   2  15        3.71        1.23      1.78 o 
  -1   3  15        9.56        9.69      2.24 o 
   0   3  15        2.78        2.65      1.68 o 
   1   3  15       11.59       12.46      1.51 o 
   2   3  15        0.12       -2.45      1.64 o 
  -2   4  15        3.00        3.69      1.81 o 
  -1   4  15        7.51        6.57      2.01 o 
   0   4  15        8.70       10.34      1.41 o 
   1   4  15        3.09        2.44      1.20 o 
   2   4  15        2.53        2.38      1.42 o 
  -1   5  15        0.92        2.74      1.64 o 
   0   5  15       11.79       11.09      1.71 o 
   1   5  15        1.84        3.34      2.03 o 
   2   5  15        0.47        1.54      1.36 o 
  -1   6  15        2.95        2.99      1.74 o 
   0   6  15        0.02        0.64      1.11 o 
   1   6  15       15.42       18.88      1.89 o 
   2   6  15        0.08       -1.35      1.27 o 
  -1   7  15       13.39       17.13      1.80 o 
   0   7  15        0.02       -1.65      1.10 o 
   1   7  15        0.92        0.82      1.23 o 
   0   8  15        3.84        2.77      1.39 o 
   1   8  15        5.26        3.46      1.48 o 
   0   0  16        6.76        7.05      1.81 o 
  -1   1  16        0.89        2.02      1.62 o 
   0   1  16        1.54        2.20      1.84 o 
   1   1  16        0.40        1.77      1.77 o 
  -1   2  16        6.00        5.19      2.16 o 
   0   2  16        4.59        5.35      2.10 o 
   1   2  16        3.11        6.18      1.98 o 
   0   3  16        1.90        1.90      1.72 o 
   1   3  16        0.16        1.42      1.32 o 
  -1   4  16        1.46       -0.30      1.86 o 
   0   4  16        1.63        1.35      1.67 o 
   1   4  16        0.05       -0.95      1.11 o 
  -1   5  16        1.87        1.99      1.81 o 
   0   5  16        0.37        0.19      1.69 o 
   1   5  16        2.54        2.61      1.31 o 
   0   6  16        0.16       -1.02      1.18 o 
   1   6  16        0.90        2.13      1.39 o 
                                                 
